# Supplementary material for: Associations of Lipids and Lipid-Lowering Drugs with Risk of Vascular Dementia: A Mendelian Randomization Study
Source: MDPI journal article supplement (doi:10.3390/nu15010069), 2022-12-23
Supplement: s1 [file s1]

## **Supplementary Materials**

**Supplementary Figure S1A:** Scatter plot showing the association of the SNP effects on HDL-C level against the SNP effects on vascular dementia;

**Supplementary Figure S1B:** Scatter plot showing the association of the SNP effects on LDL-C level against the SNP effects on vascular dementia;

**Supplementary Figure S1C:** Scatter plot showing the association of the SNP effects on TG levels against the SNP effects on vascular dementia;

**Supplementary Figure S1D:** Scatter plot showing the association of the SNP effects on apoA-I level against the SNP effects on vascular dementia;

**Supplementary Figure S1E:** Scatter plot showing the association of the SNP effects on the apoB level against the SNP effects on vascular dementia;

**Supplementary Figure S2A:** Leave-one-out permutation analysis of the causal association between HDL-C level and vascular dementia;

**Supplementary Figure S2B:** Leave-one-out permutation analysis of the causal association between LDL-C level and vascular dementia;

**Supplementary Figure S2C:** Leave-one-out permutation analysis of the causal association between TG level and vascular dementia;

**Supplementary Figure S2D:** Leave-one-out permutation analysis of the causal association between apoA-I level and vascular dementia;

**Supplementary Figure S2E:** Leave-one-out permutation analysis of the causal

association between apoB level and vascular dementia;

**Supplementary Figure S3A:** Scatter plot showing the association of the SNP effects on vascular dementia against the SNP effects on LDL-C level;

**Supplementary Figure S3B:** Scatter plot showing the association of the SNP effects on vascular dementia against the SNP effects on TG levels;

**Supplementary Figure S3C:** Scatter plot showing the association of the SNP effects on vascular dementia against the SNP effects on the apoA-I level;

**Supplementary Figure S3D:** Scatter plot showing the association of the SNP effects on vascular dementia against the SNP effects on the apoB level;

**Supplementary Figure S4A:** Leave-one-out permutation analysis of the causal association between vascular dementia and LDL-C level;

**Supplementary Figure 4B.** Leave-one-out permutation analysis of the causal association between vascular dementia and TG level;

**Supplementary Figure S4C:** Leave-one-out permutation analysis of the causal association between vascular dementia and apoA-I level;

**Supplementary Figure S4D:** Leave-one-out permutation analysis of the causal association between vascular dementia and apoB level;

**Supplementary Figure S5A:** Scatter plot showing the association of the SNP effect on LDL-C level mediated by the *HMGCR* gene against the SNP effects on vascular dementia;

**Supplementary Figure S5B:** Scatter plot showing the association of the SNP effect on LDL-C level mediated by the *PCSK9* gene against the SNP effects on vascular dementia;

**Supplementary Figure S5C:** Scatter plot showing the association of the SNP effect on LDL-C level mediated by the *NPC1L1* gene against the SNP effects on vascular dementia;

**Supplementary Figure S5D:** Scatter plot showing the association of the SNP effect on LDL-C level mediated by the *APOB* gene against the SNP effects on vascular dementia;

**Supplementary Figure S6A:** Leave-one-out permutation analysis of the causal association between LDL-C level mediated by the *HMGCR* gene and vascular dementia;

**Supplementary Figure S6B:** Leave-one-out permutation analysis of the causal association between LDL-C level mediated by the *PCSK9* gene and vascular dementia;

**Supplementary Figure S6C:** Leave-one-out permutation analysis of the causal association between LDL-C level mediated by the *NPC1L1* gene and vascular dementia;

**Supplementary Figure S6D:** Leave-one-out permutation analysis of the causal Supplementary association between LDL-C level mediated by the *APOB* gene and vascular dementia;

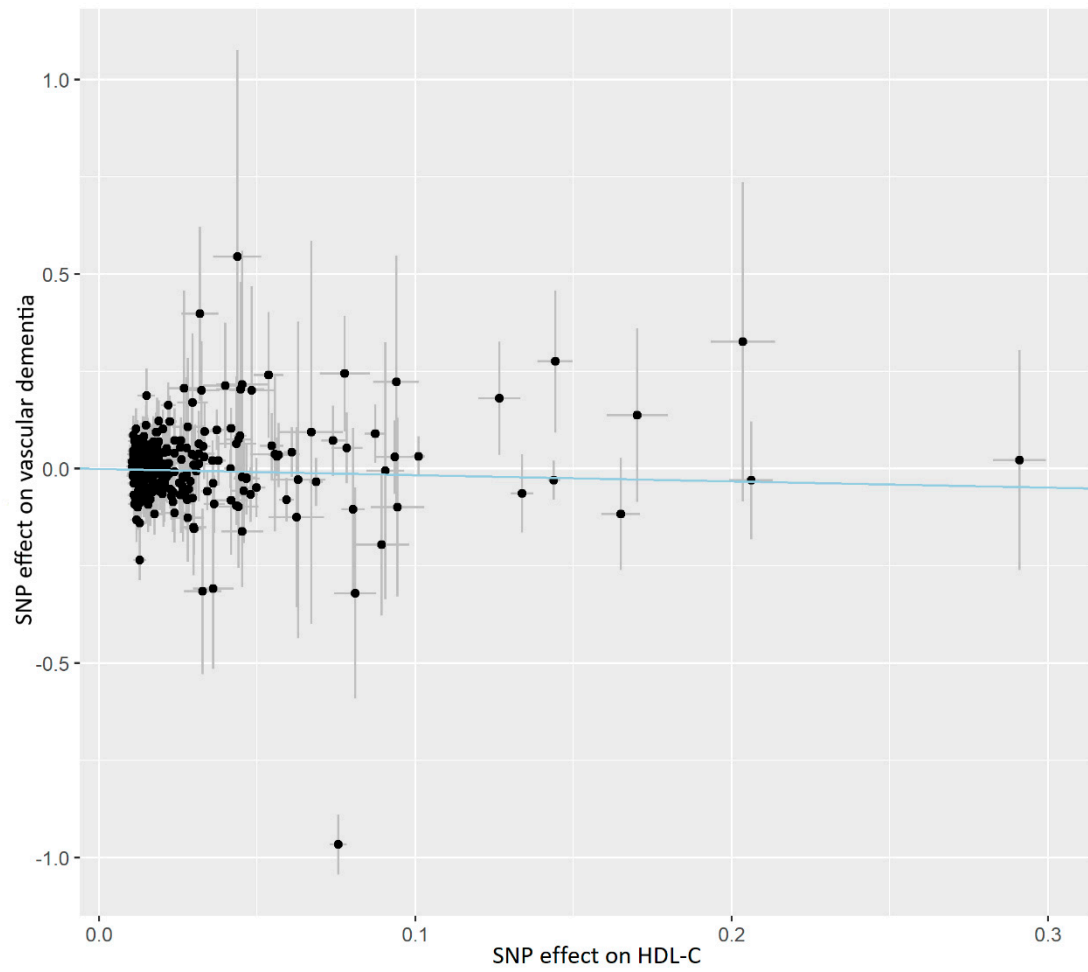

**Supplementary Figure S1A.** Scatter plot showing the association of the SNP effects on HDL-C level against the SNP effects on vascular dementia.

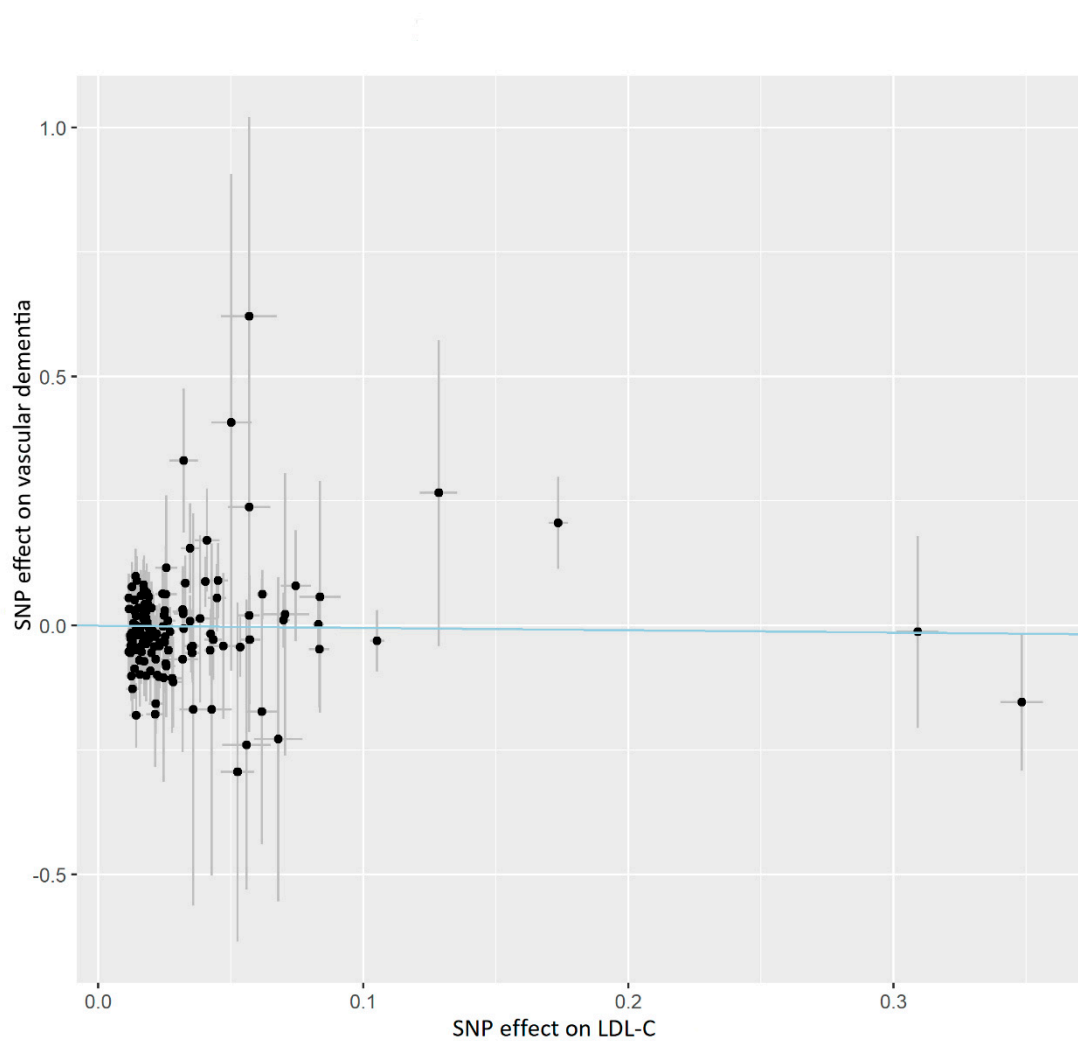

**Supplementary Figure S1B.** Scatter plot showing the association of the SNP effects on LDL-C level against the SNP effects on vascular dementia.

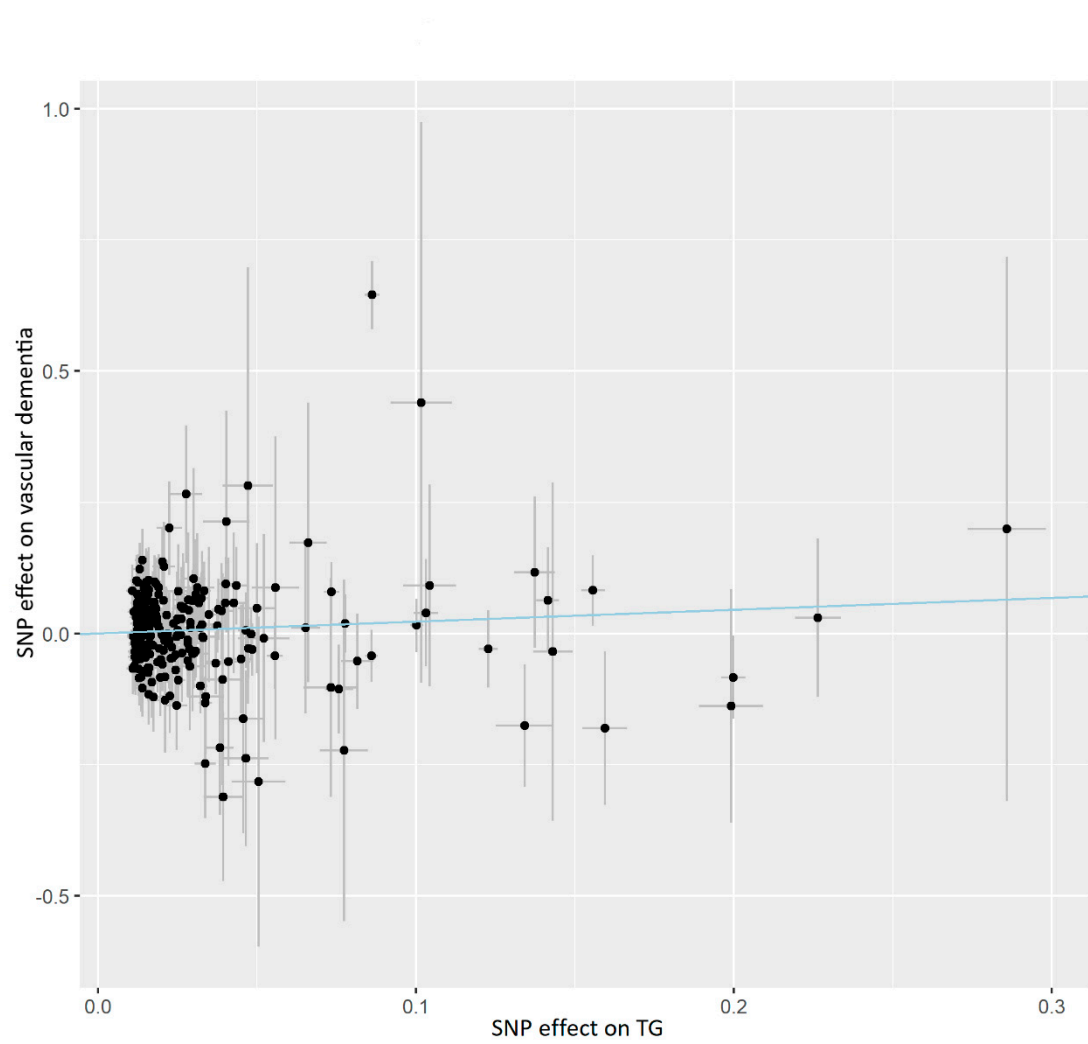

**Supplementary Figure S1C.** Scatter plot showing the association of the SNP effects on TG levels against the SNP effects on vascular dementia.

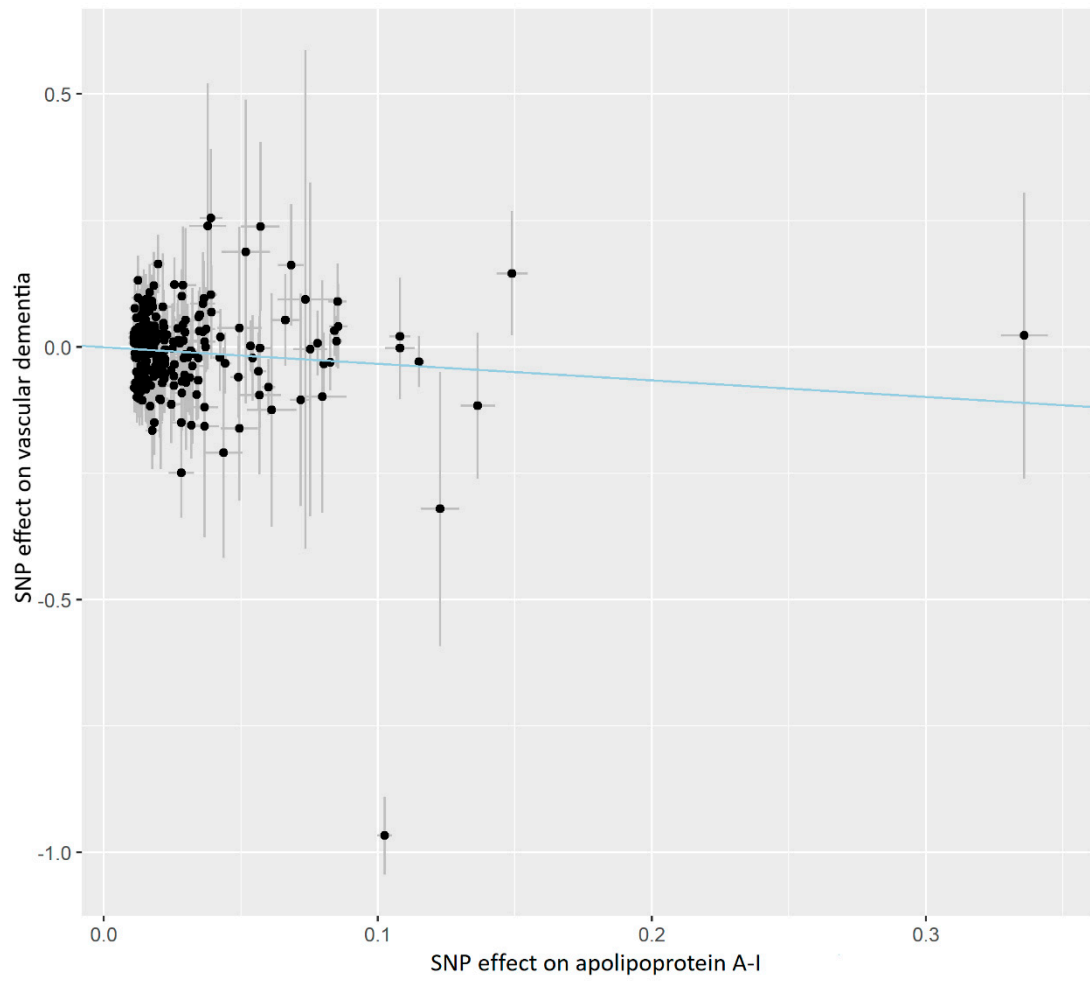

**Supplementary Figure S1D.** Scatter plot showing the association of the SNP effects on apoA-I level against the SNP effects on vascular dementia.

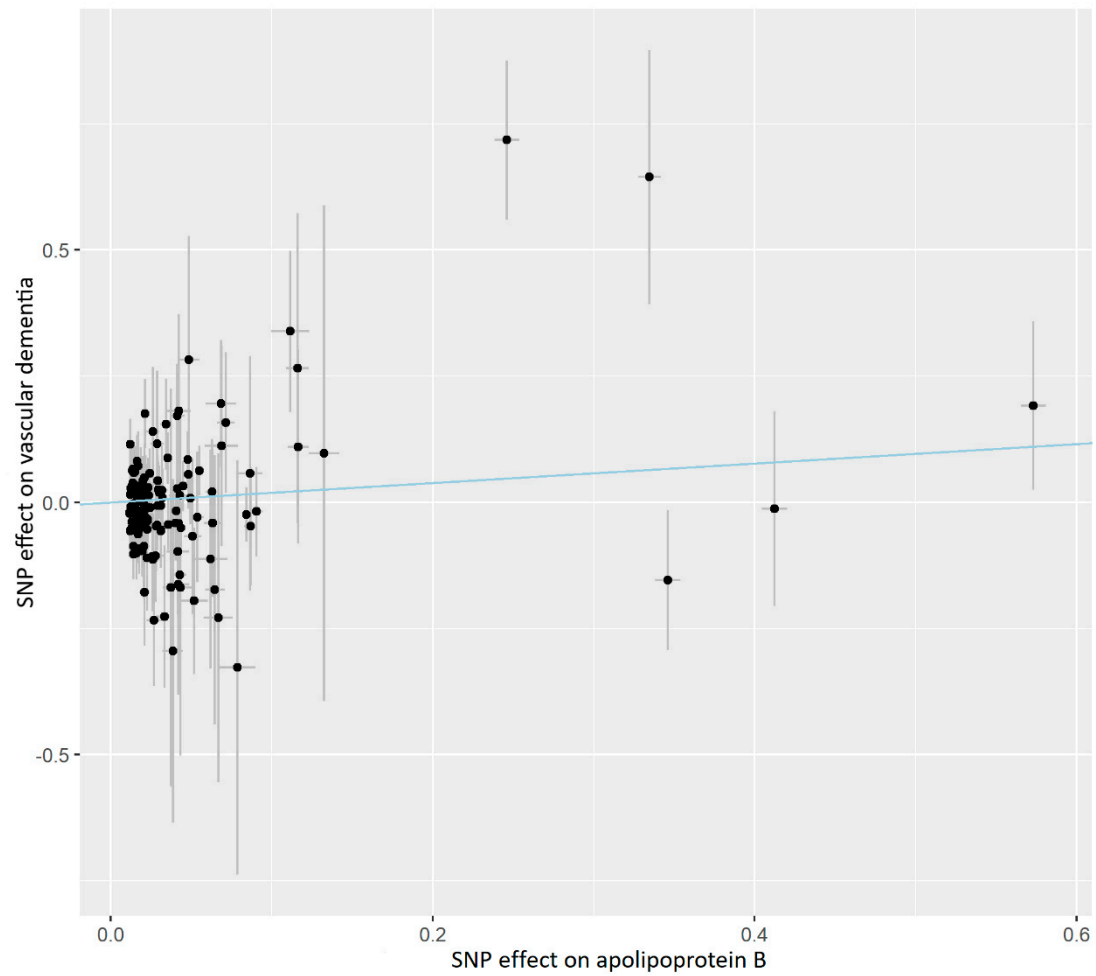

**Supplementary Figure S1E.** Scatter plot showing the association of the SNP effects on the apoB level against the SNP effects on vascular dementia.



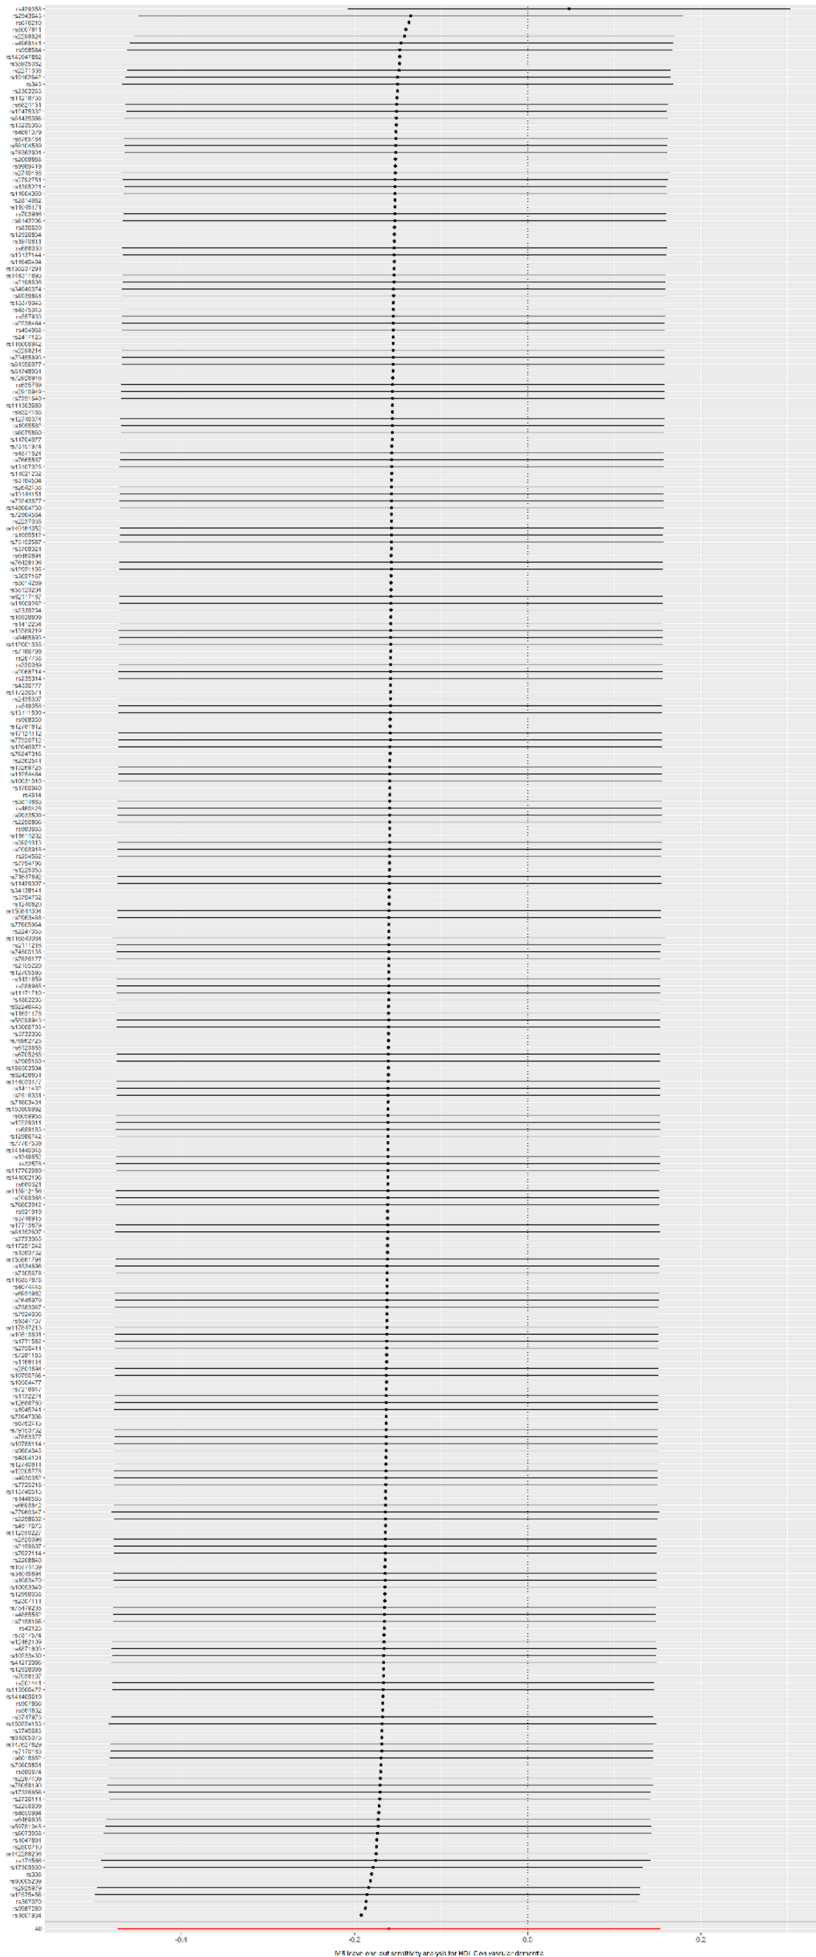

**Supplementary Figure S2A.** Leave-one-out permutation analysis of the causal association between HDL-C level and vascular dementia.

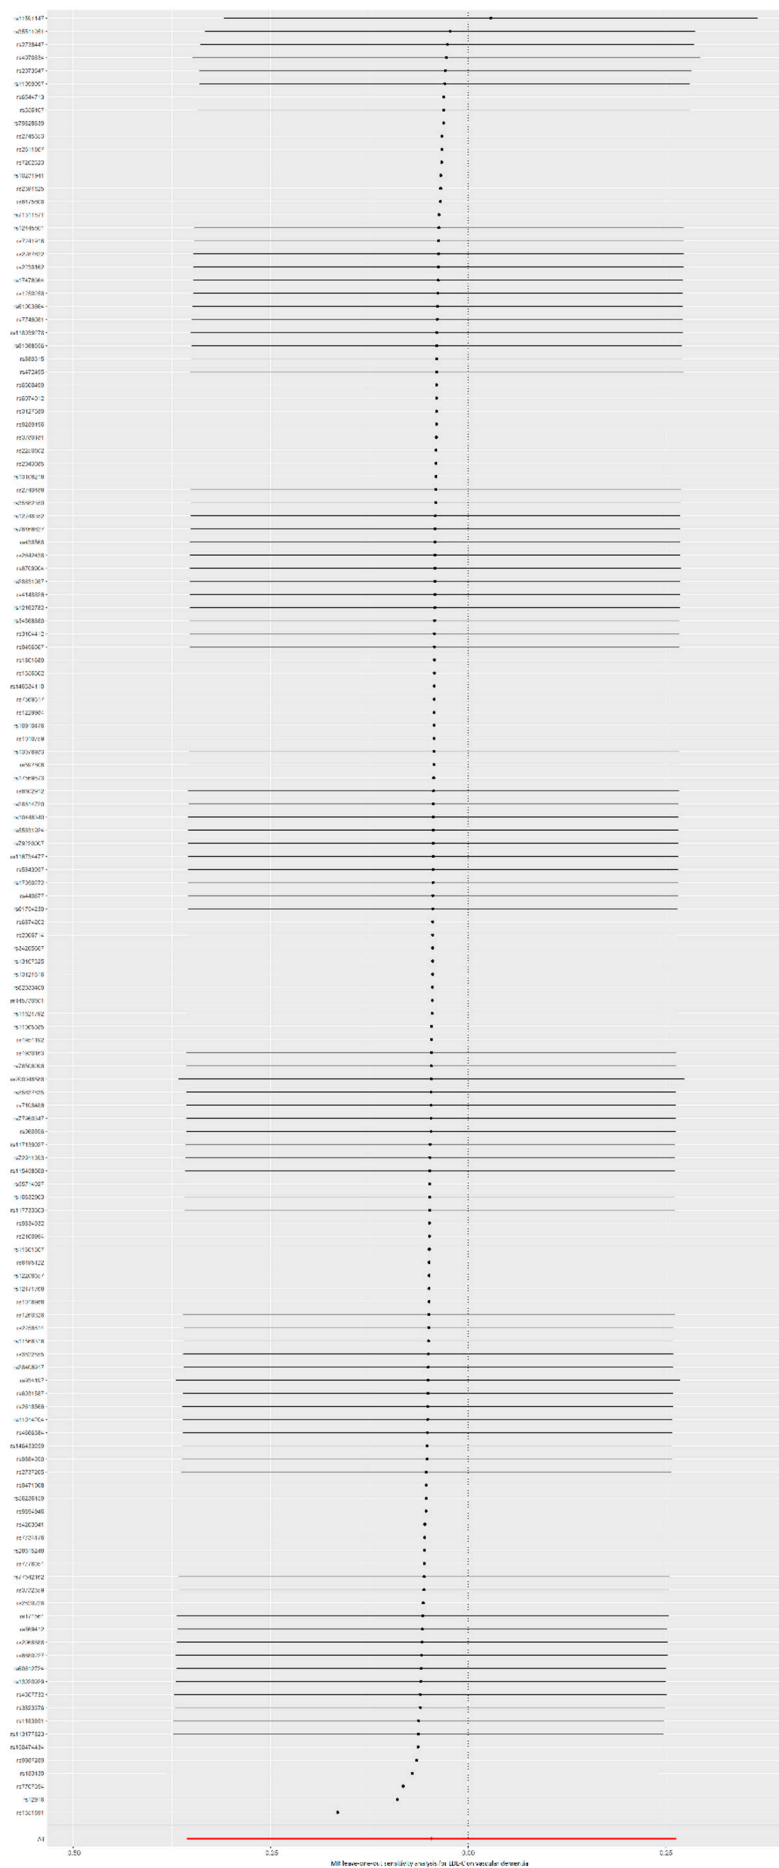

**Supplementary Figure S2B.** Leave-one-out permutation analysis of the causal association between LDL-C level and vascular dementia.

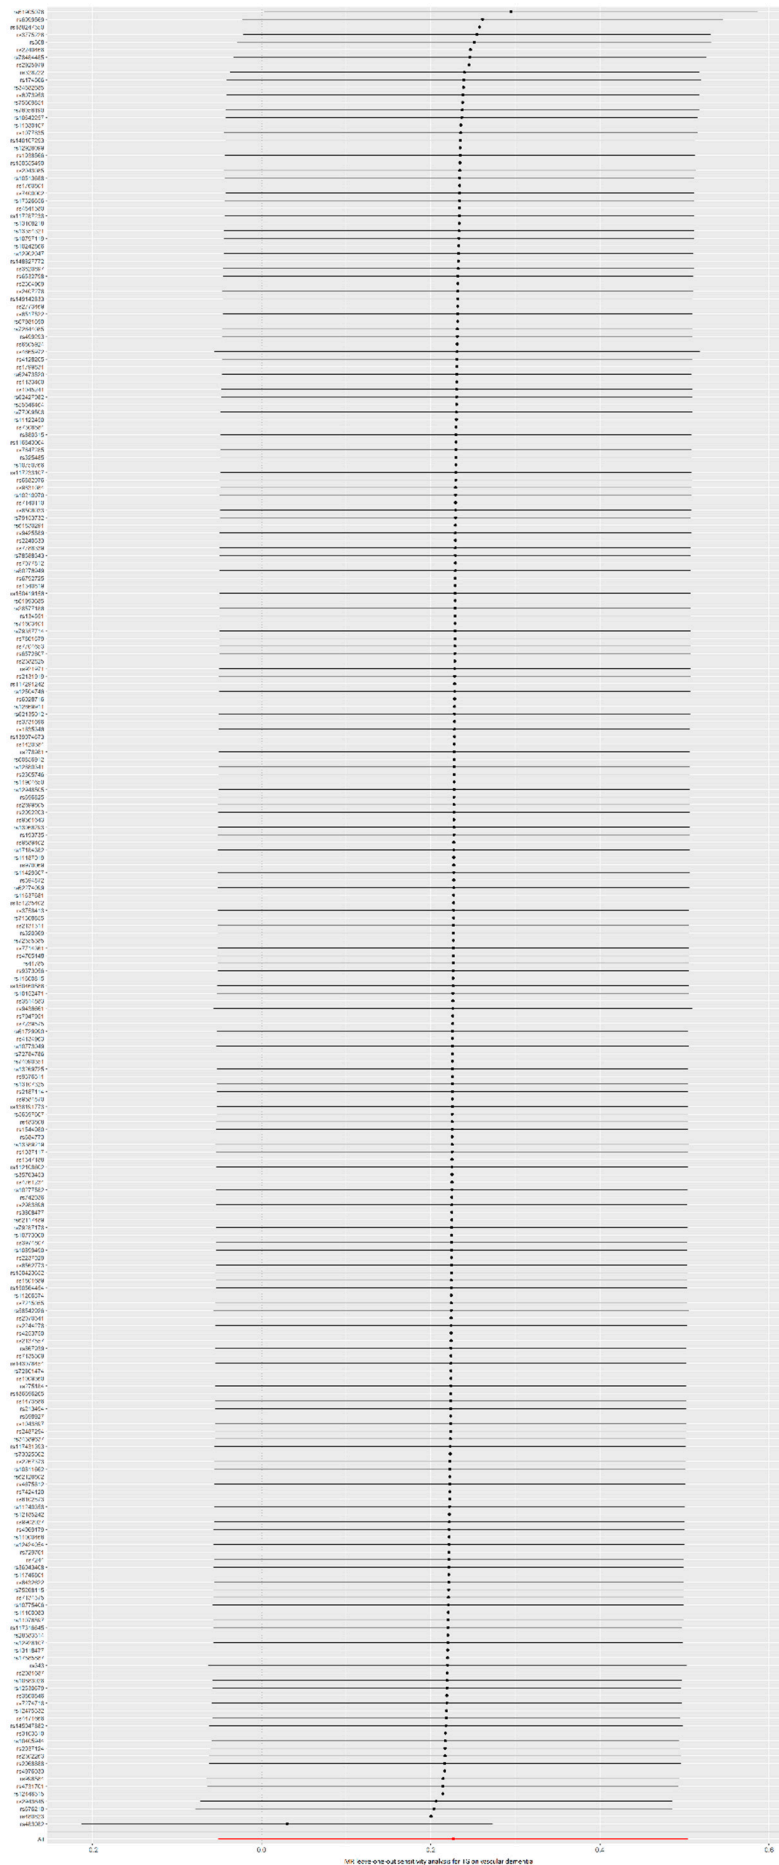

**Supplementary Figure S2C.** Leave-one-out permutation analysis of the causal association between TG level and vascular dementia.

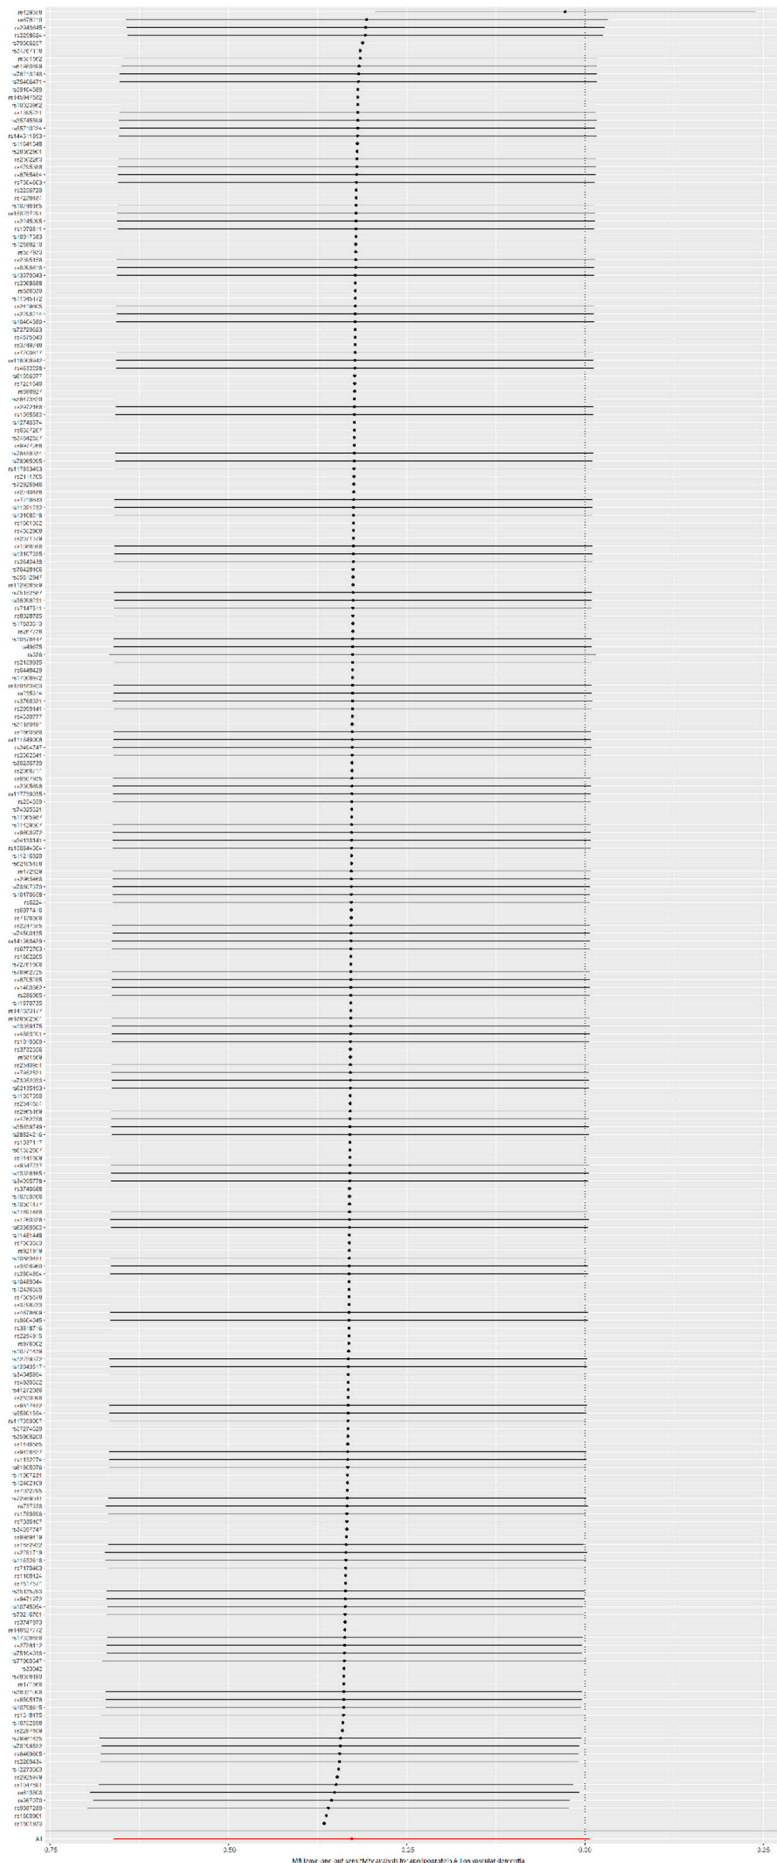

**Supplementary Figure S2D.** Leave-one-out permutation analysis of the causal association between apoA-I level and vascular dementia.



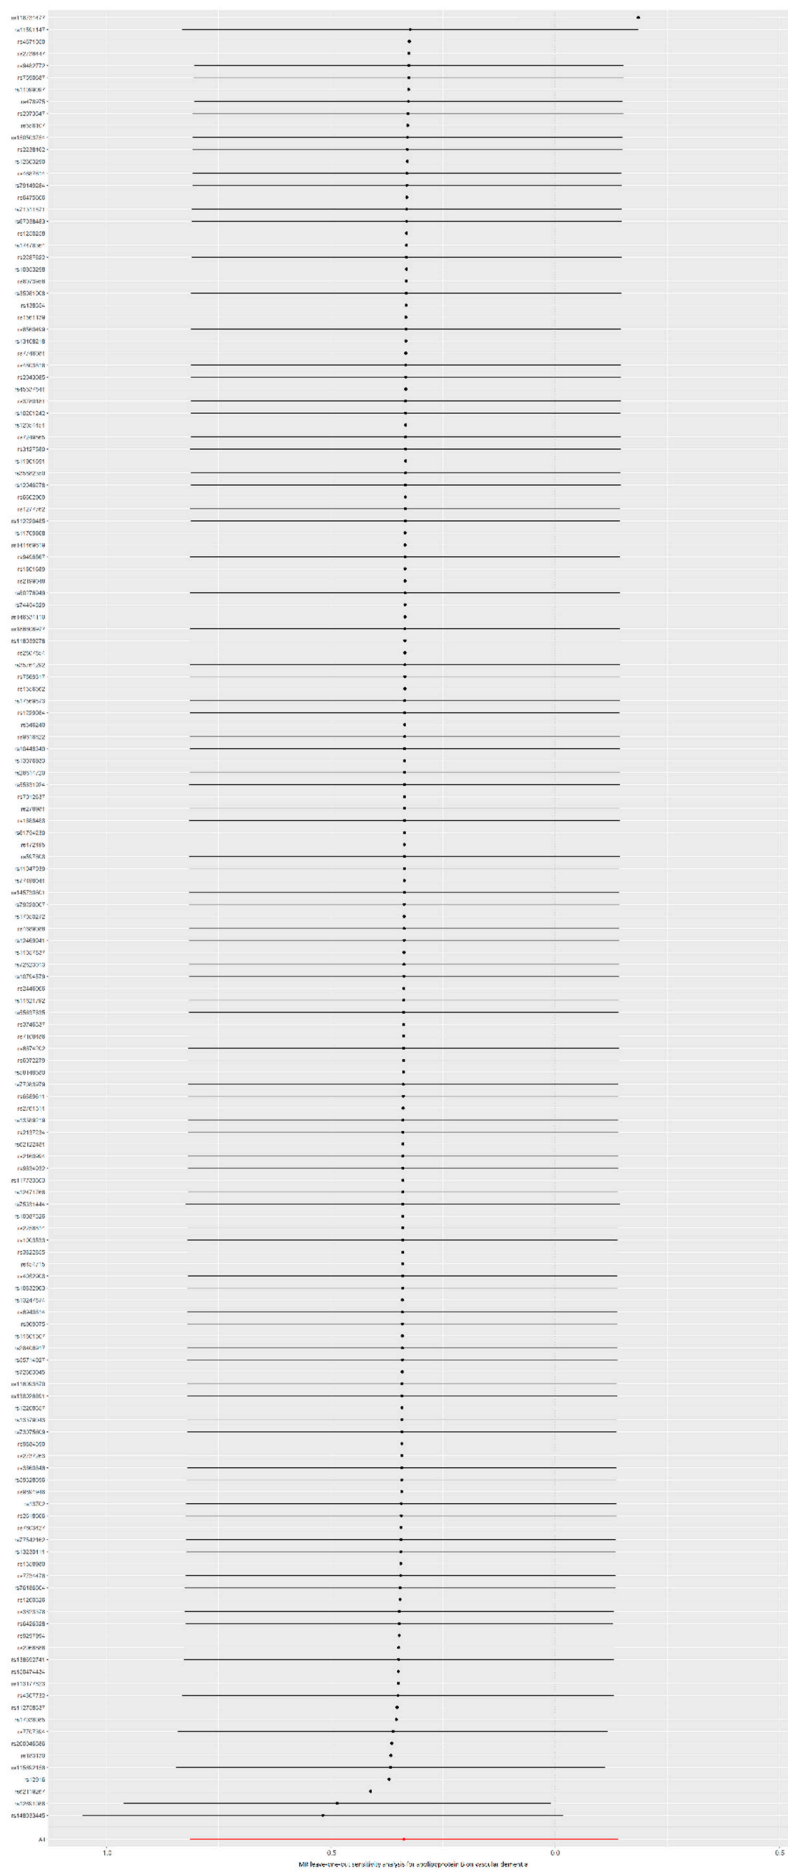

**Supplementary Figure S2E.** Leave-one-out permutation analysis of the causal association between apoB level and vascular dementia.

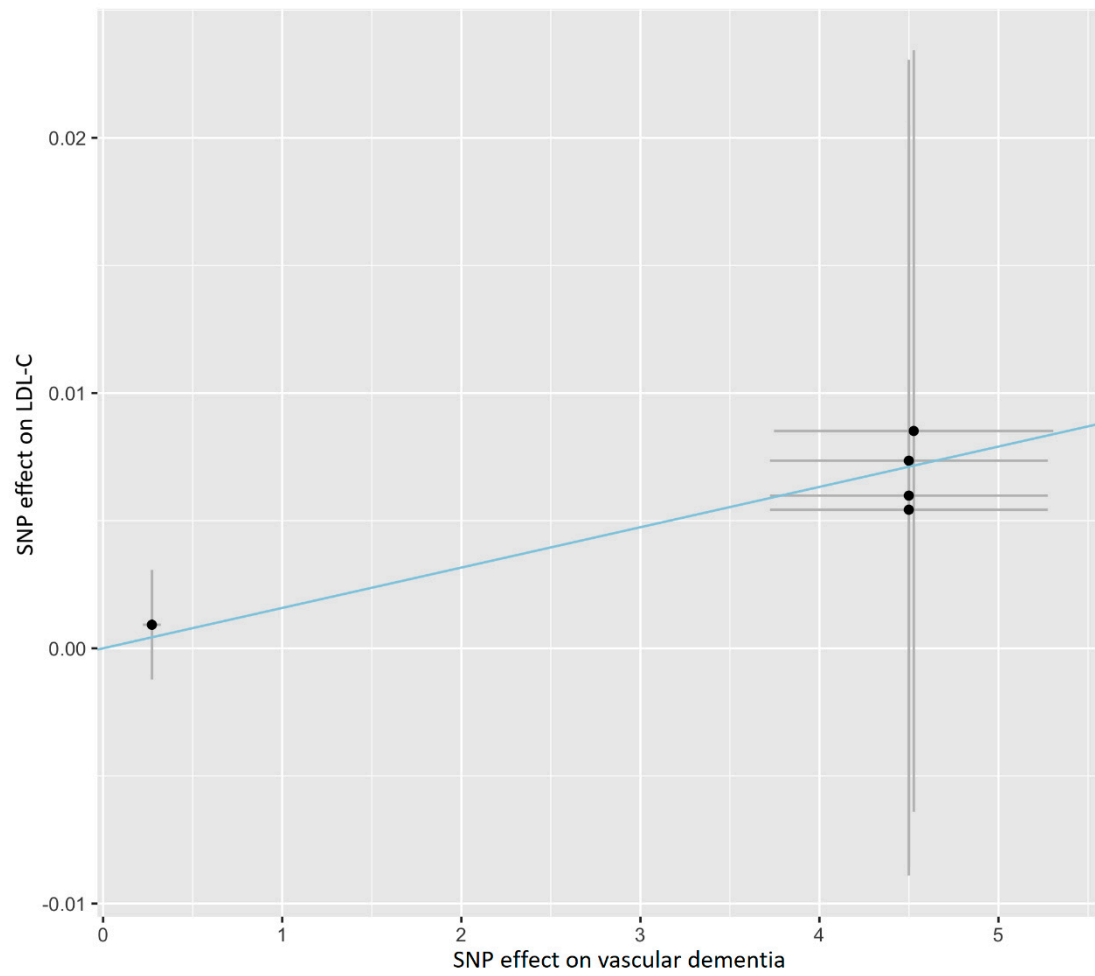

**Supplementary Figure S3A.** Scatter plot showing the association of the SNP effects on vascular dementia against the SNP effects on LDL-C level.

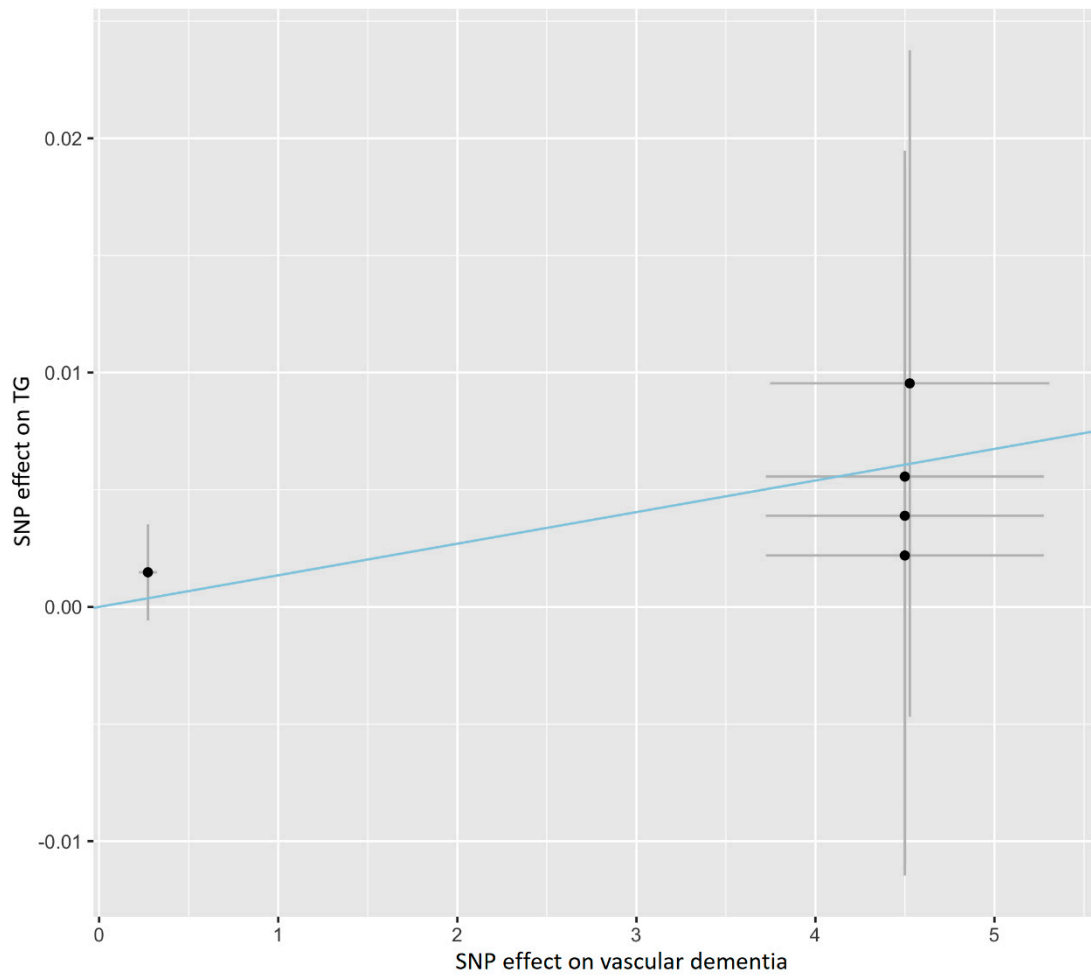

**Supplementary Figure S3B.** Scatter plot showing the association of the SNP effects on vascular dementia against the SNP effects on TG level.

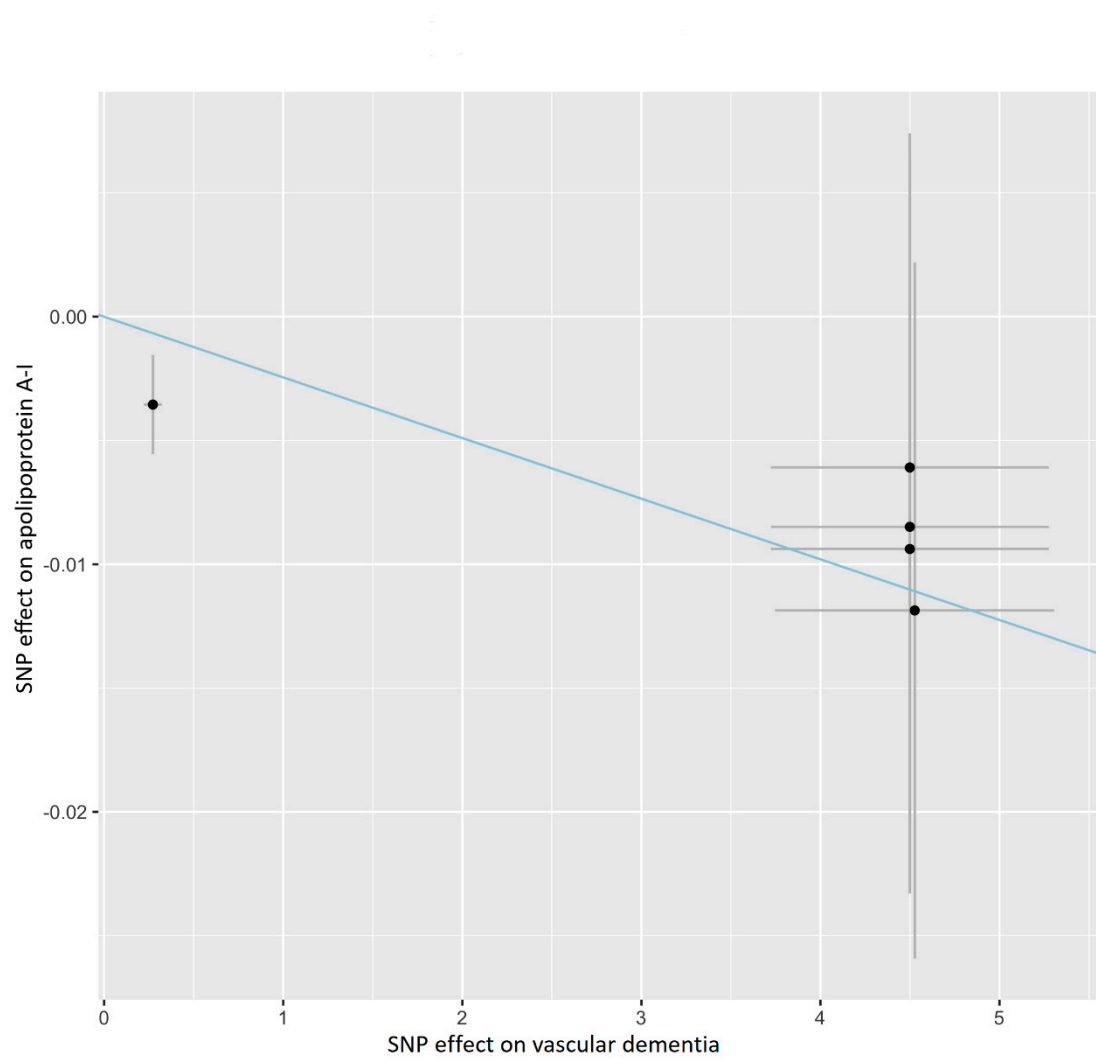

**Supplementary Figure S3C.** Scatter plot showing the association of the SNP effects on vascular dementia against the SNP effects on the apoA-I level.

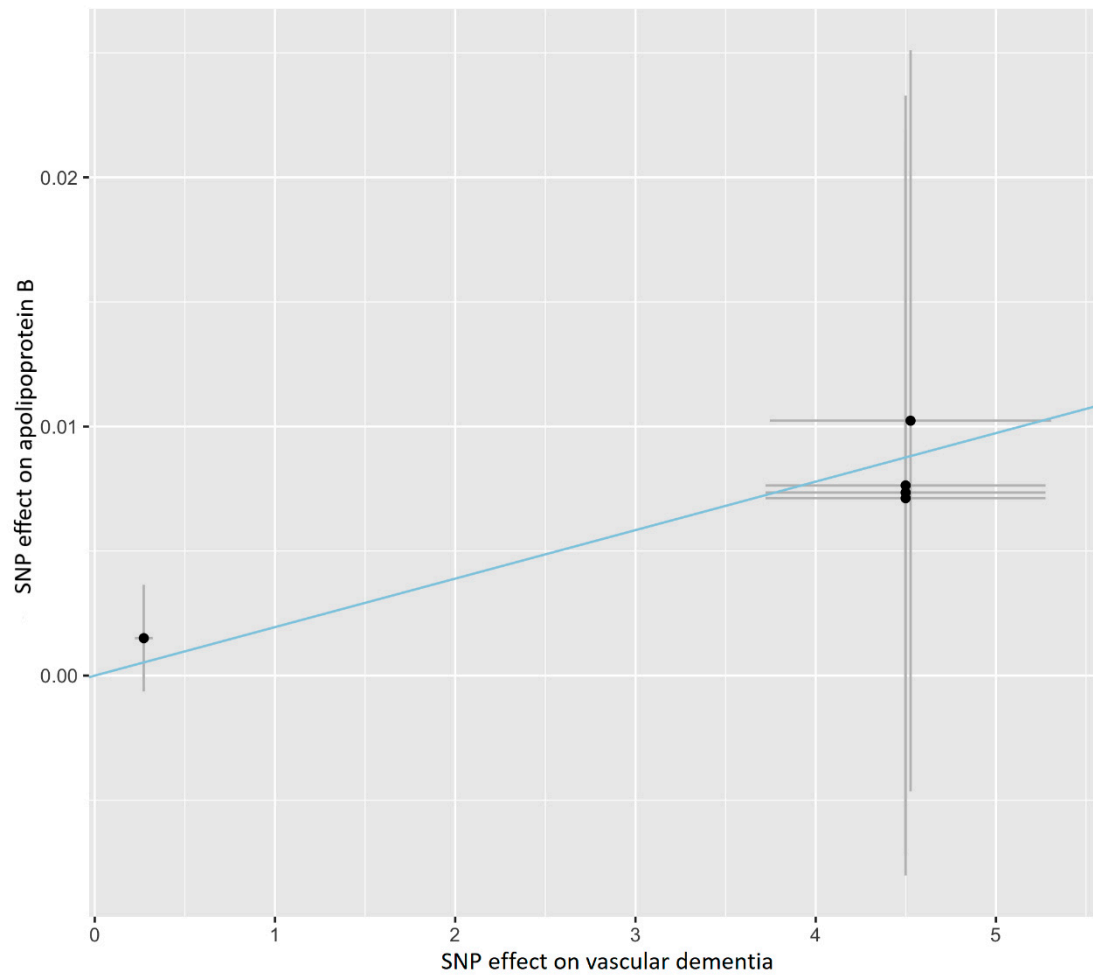

**Supplementary Figure S3D.** Scatter plot showing the association of the SNP effects on vascular dementia against the SNP effects on the apoB level.

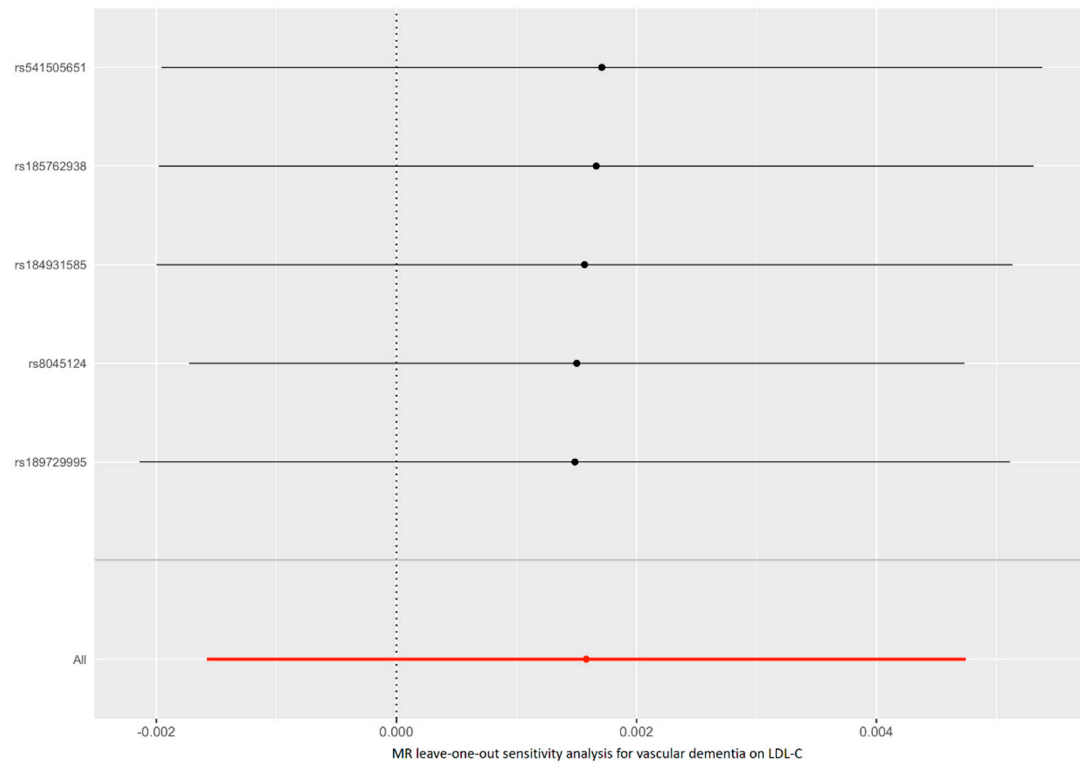

**Supplementary Figure S4A.** Leave-one-out permutation analysis of the causal association between vascular dementia and LDL-C level.

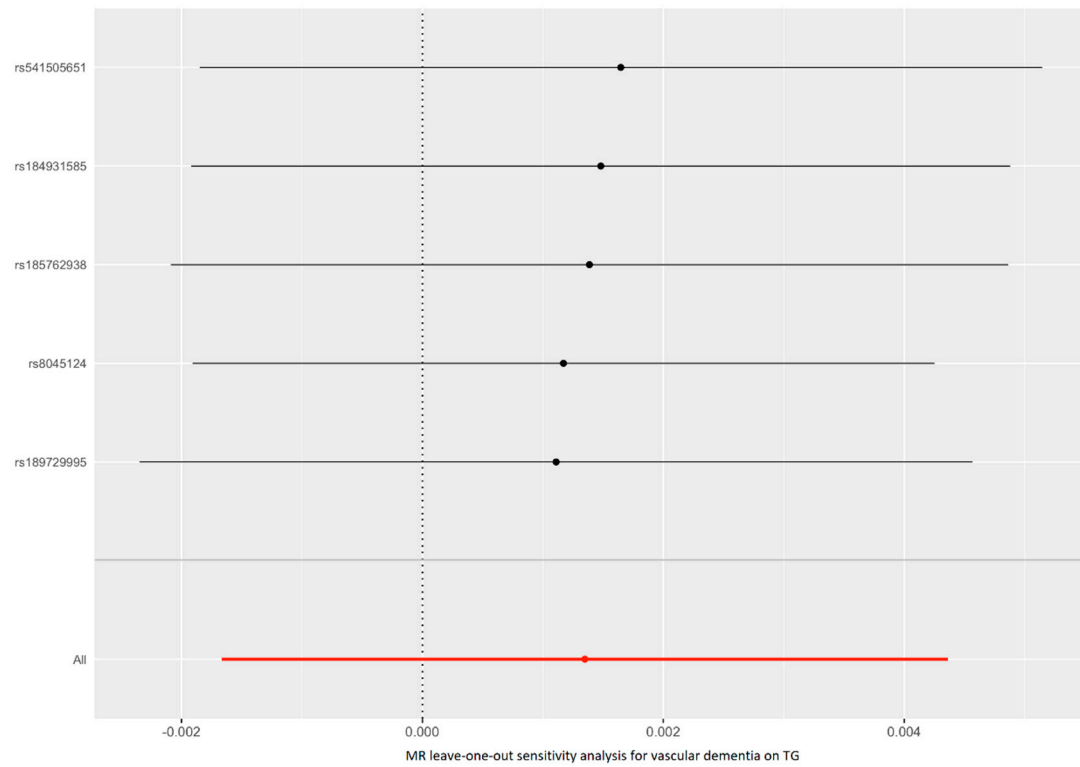

**Supplementary Figure S4B.** Leave-one-out permutation analysis of the causal association between vascular dementia and TG level.



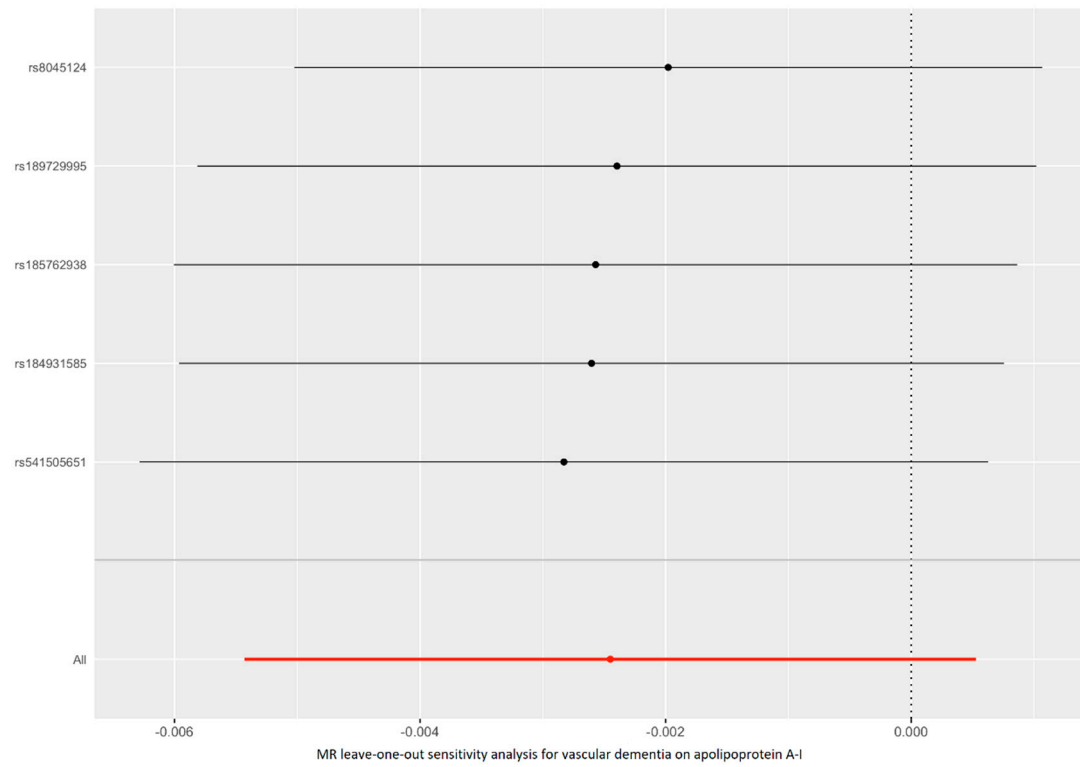

**Supplementary Figure S4C.** Leave-one-out permutation analysis of the causal association between vascular dementia and apoA-I level.

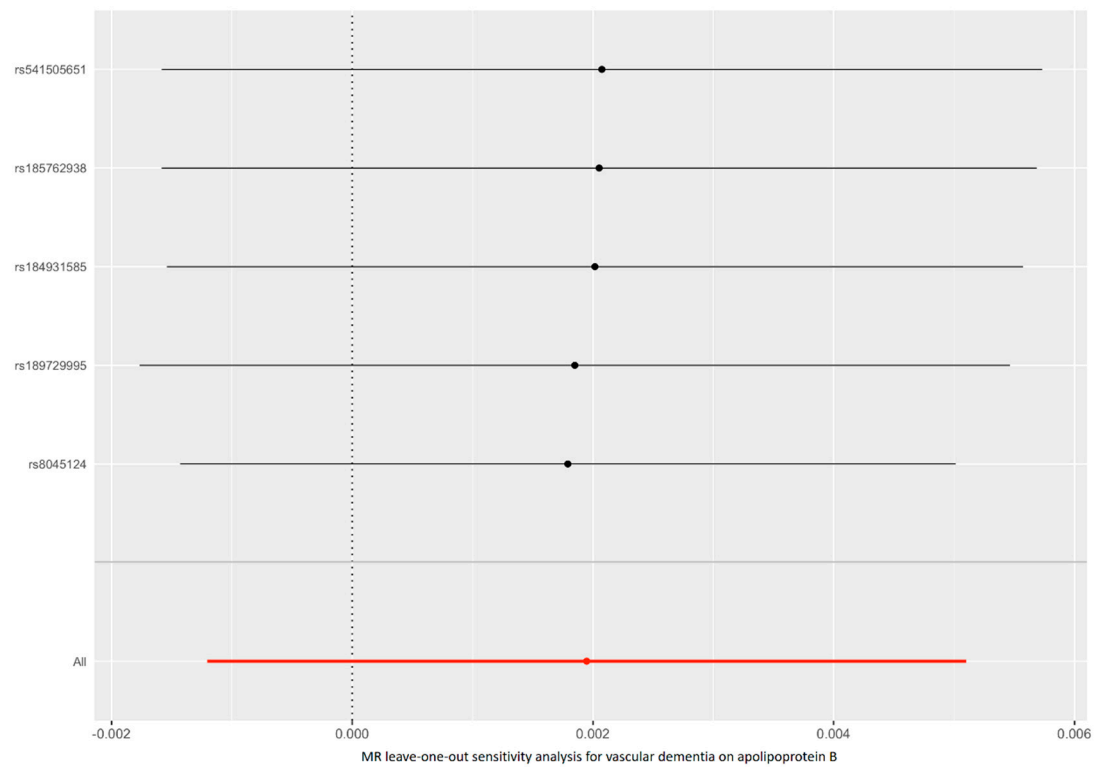

**Supplementary Figure S4D.** Leave-one-out permutation analysis of the causal association between vascular dementia and apoB level.

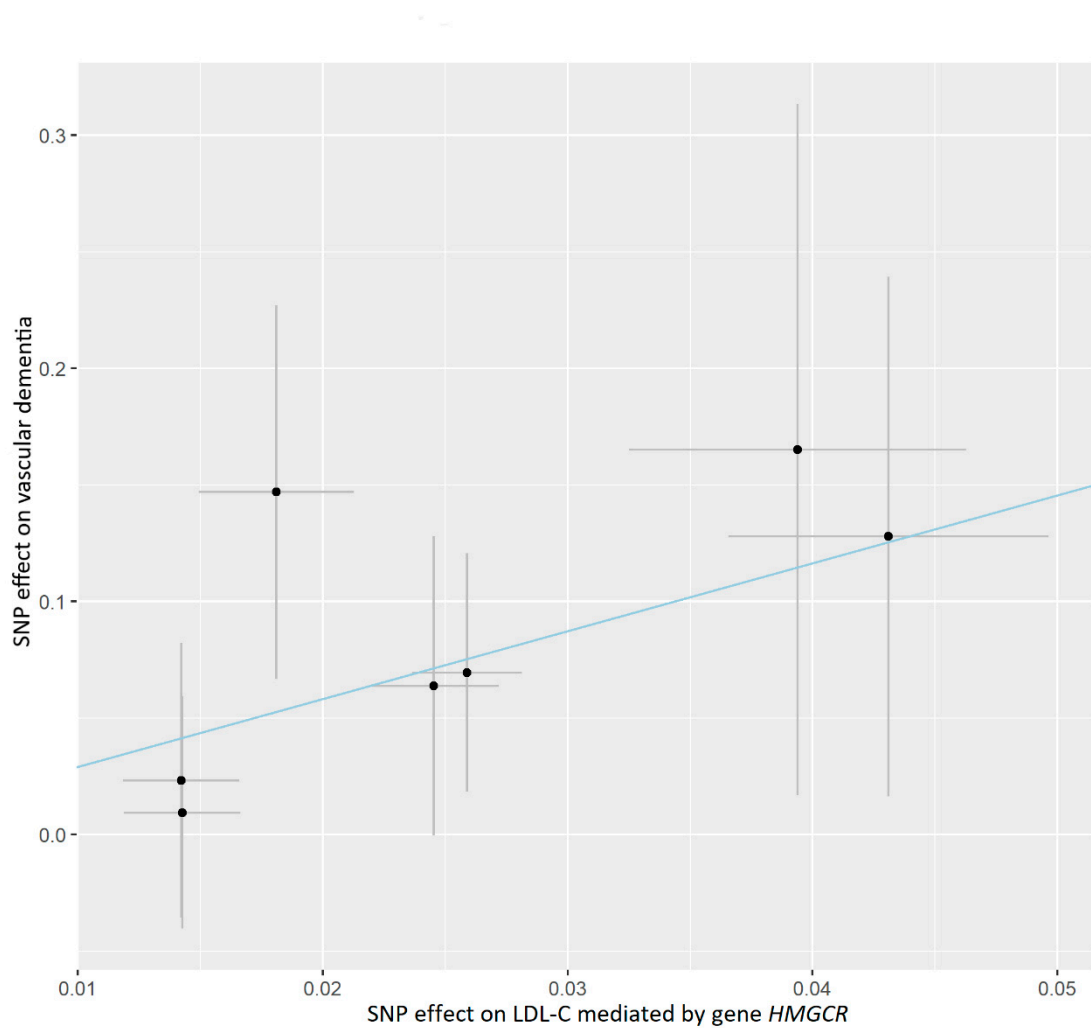

**Supplementary Figure S5A.** Scatter plot showing the association of the SNP effect on LDL-C level mediated by the *HMGCR* gene against the SNP effects on vascular dementia.

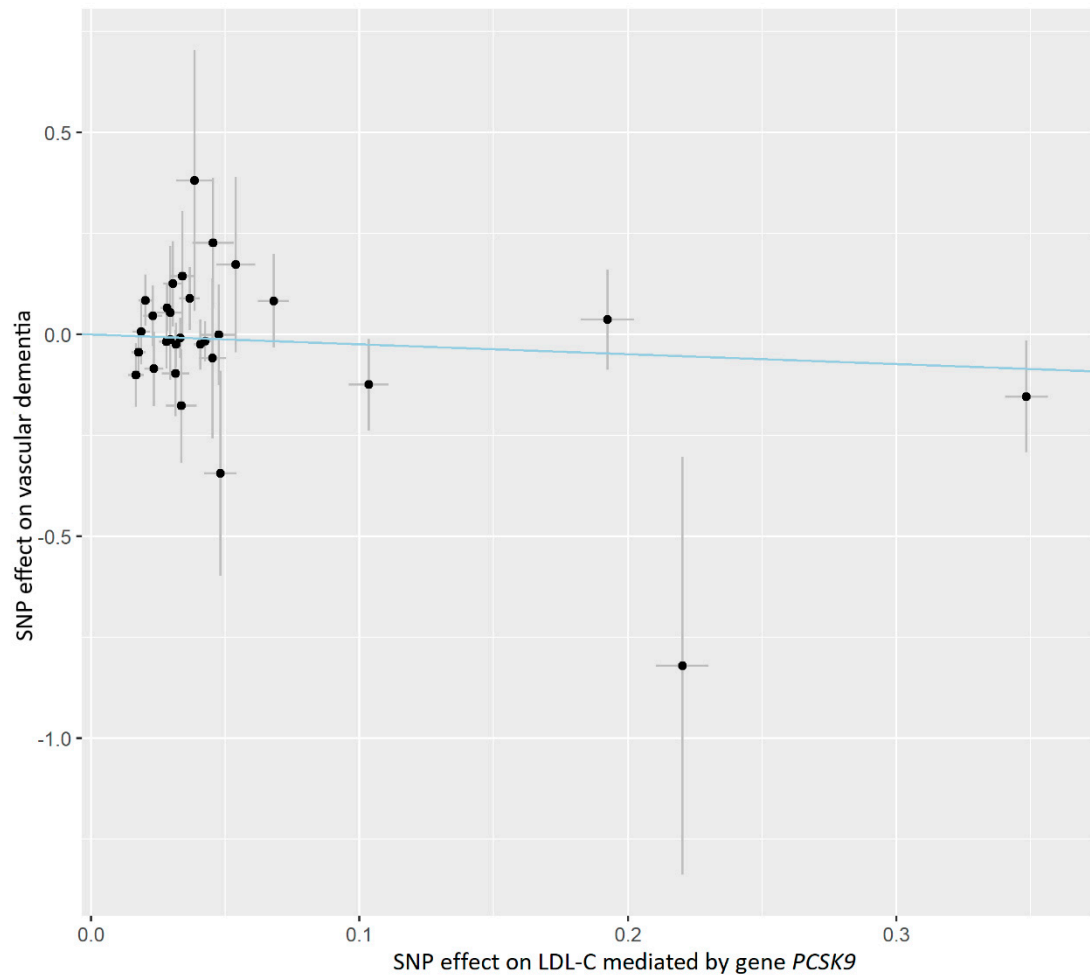

**Supplementary Figure S5B.** Scatter plot showing the association of the SNP effect on LDL-C level mediated by the *PCSK9* gene against the SNP effects on vascular dementia.

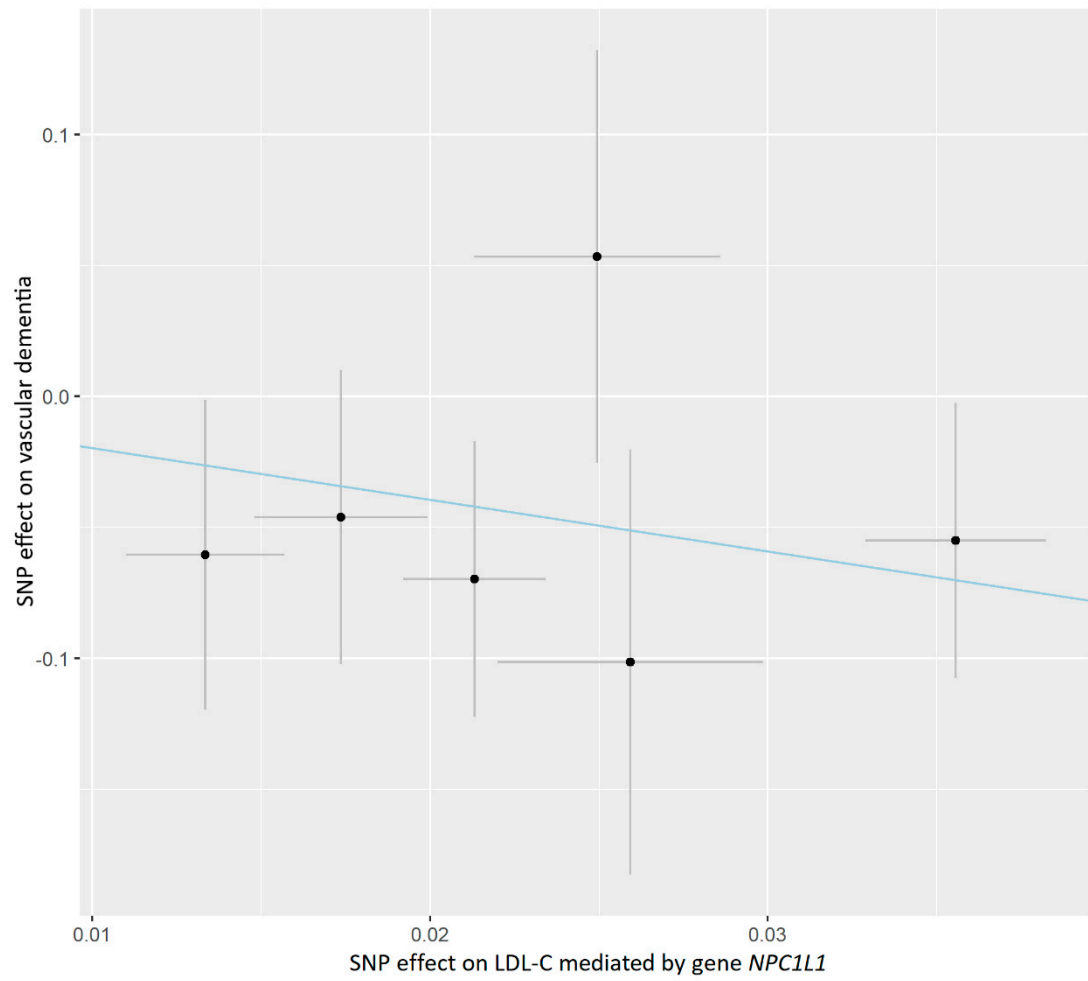

**Supplementary Figure S5C.** Scatter plot showing the association of the SNP effect on LDL-C level mediated by the *NPC1L1* gene against the SNP effects on vascular dementia.

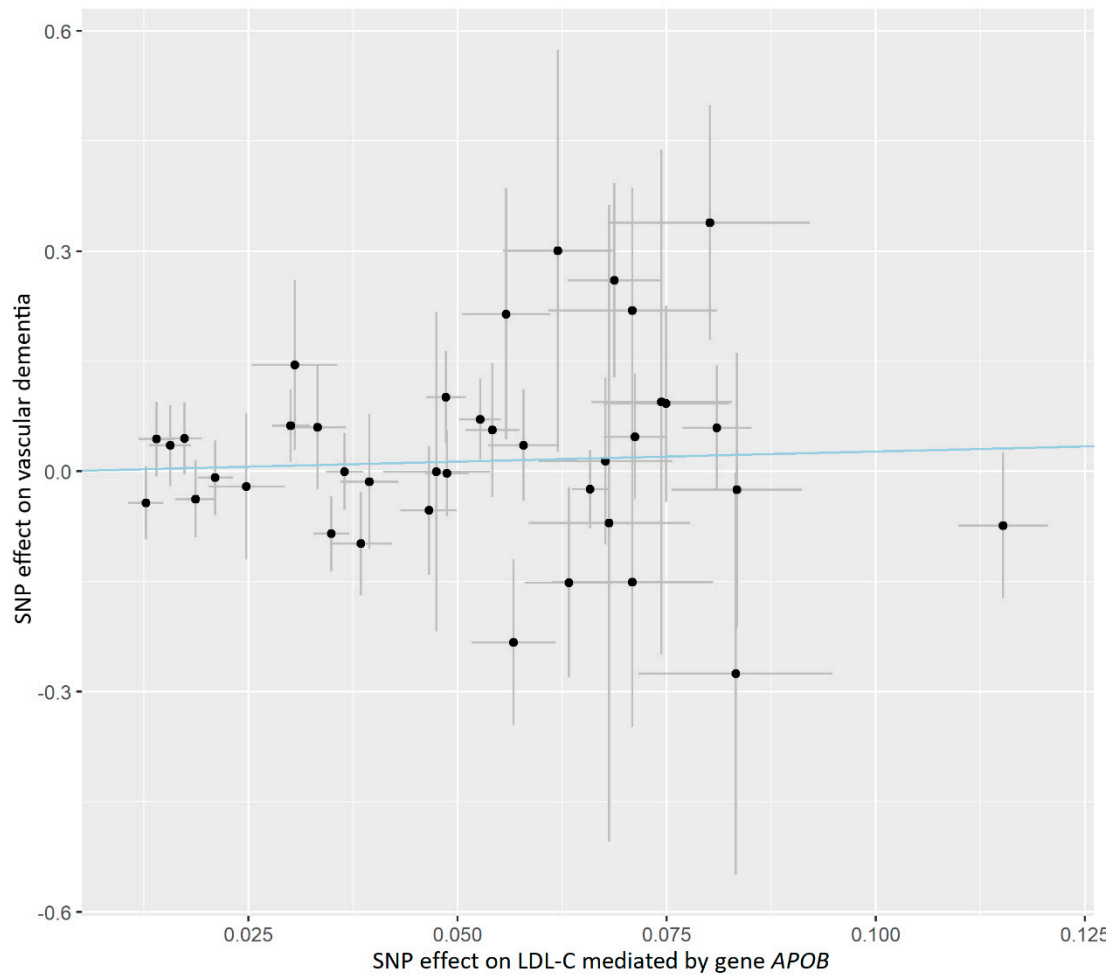

**Supplementary Figure S5D.** Scatter plot showing the association of the SNP effect on LDL-C level mediated by the *APOB* gene against the SNP effects on vascular dementia.

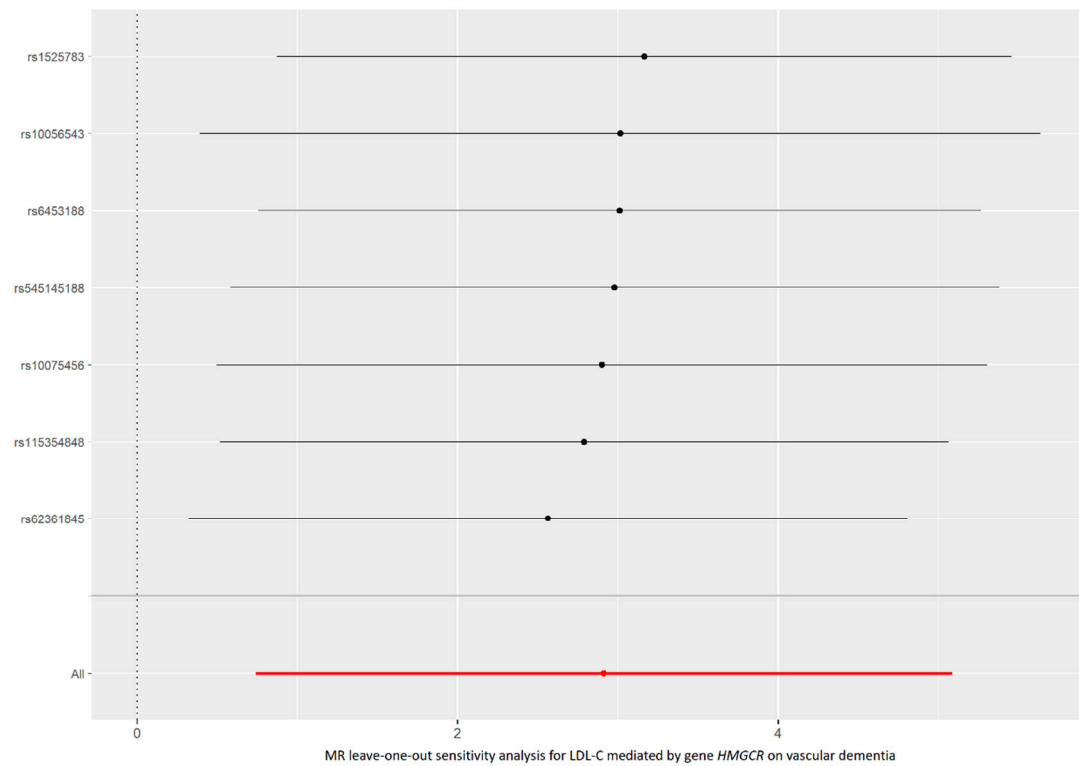

**Supplementary Figure S6A.** Leave-one-out permutation analysis of the causal association between LDL-C level mediated by the *HMGCR* gene and vascular dementia.

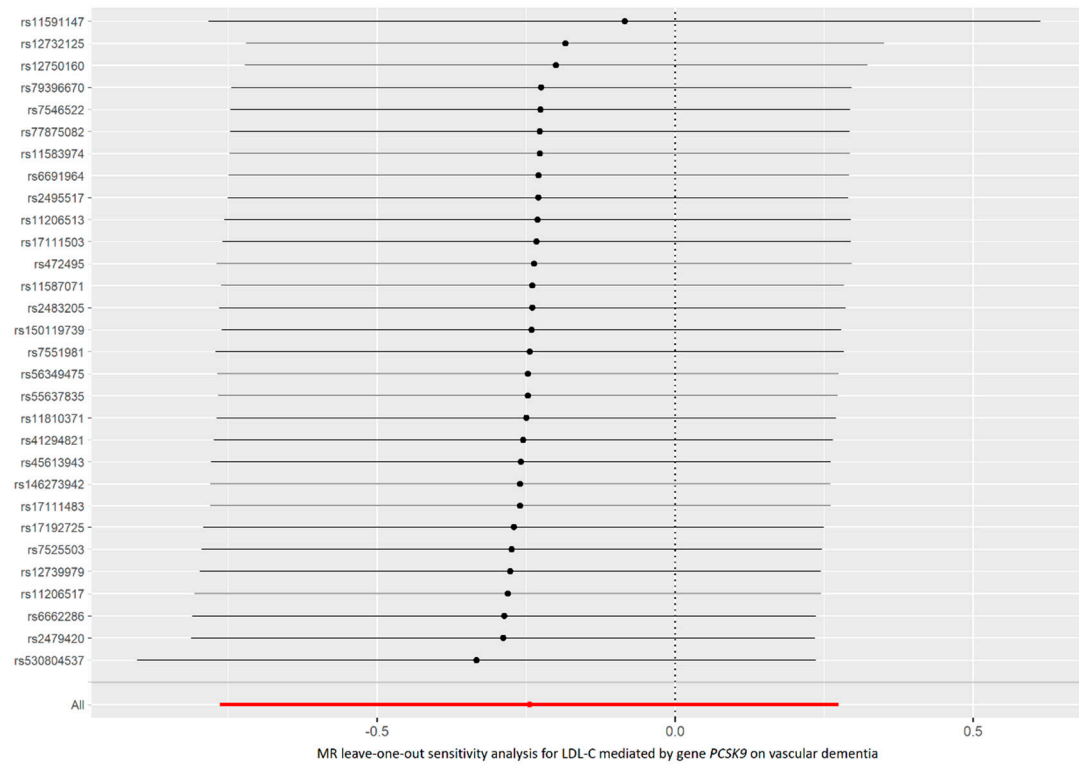

**Supplementary Figure S6B.** Leave-one-out permutation analysis of the causal association between LDL-C level mediated by the *PCSK9* gene and vascular dementia.



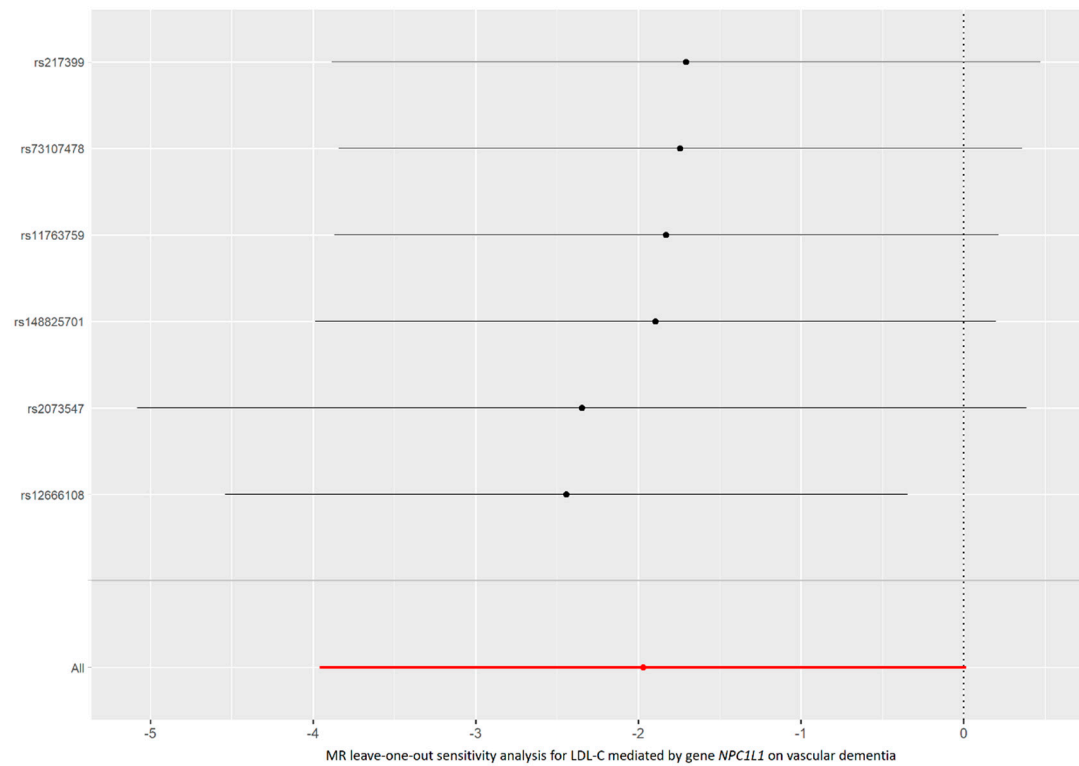

**Supplementary Figure S6C.** Leave-one-out permutation analysis of the causal association between LDL-C level mediated by the *NPC1L1* gene and vascular dementia.

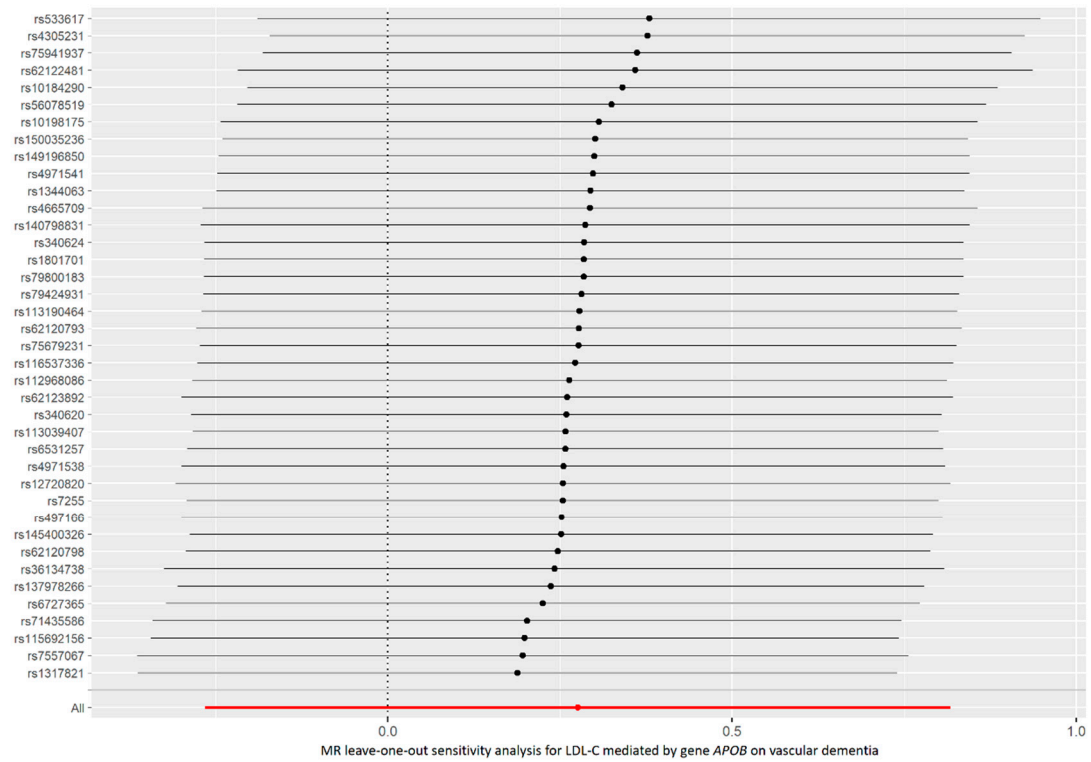

**Supplementary Figure S6D.** Leave-one-out permutation analysis of the causal association between LDL-C level mediated by the *APOB* gene and vascular dementia.
