# Supplementary material for: Associations of Lipids and Lipid-Lowering Drugs with Risk of Vascular Dementia: A Mendelian Randomization Study
Source: Nutrients. 2022 Dec 23;15(1):69. doi: 10.3390/nu15010069 (PMC9824558; doi:10.3390/nu15010069)
Supplement: Supplementary file 1 [file nutrients-15-00069-s001.zip › supplementary table .xlsx]

## Sheet: Sheet1
Supplementary Materials
Supplementary Table S1: Detailed information of eQTL and GWAS summary data
Supplementary Table S2: Summarized data for the genetic variants associated with lipid-related traits via uvMR
Supplementary Table S3: Summarized data for the genetic variants associated with vascular dementia
Supplementary Table S4: Causal effects of vascular dementia on lipid-related traits levels via reverse MR analyses
Supplementary Table S5: Summarized data for the genetic variants associated with lipid-related traits via mvMR
Supplementary Table S6: Causal effects of lipid-related traits levels on vascular dementia via multivariable IVW MR analyses
Supplementary Table S7: SMR association between expression of gene HMGCR, PCSK9, NPC1L1 or APOB and VaD outcomes
Supplementary Table S8: Information of genetic instrumental variants associated with LDL cholesterol located within 200 kb windows from gene HMGCR, PCSK9, NPC1L1 or APOB

## Sheet: Table S1 
Supplementary Table S1. Detailed information of eQTL and GWAS summary data
Characteristic	Resource	Sample size	Population ancestry	Reference	Data download
Lipid-related traits
HDL-C	UK Biobank	403943	European	Sinnott-Armstrong, N.; Tanigawa, Y.; Amar, D.; Mars, N.; Benner, C.; Aguirre, M.; Venkataraman, G.R.; Wainberg, M.; Ollila, H.M.; Kiiskinen, T.; et al. Genetics of 35 blood and urine biomarkers in the UK Biobank. Nat. Genet. 2021, 53, 185–194.	https://gwas.mrcieu.ac.uk/
LDL-C	UK Biobank	440546	European	Sinnott-Armstrong, N.; Tanigawa, Y.; Amar, D.; Mars, N.; Benner, C.; Aguirre, M.; Venkataraman, G.R.; Wainberg, M.; Ollila, H.M.; Kiiskinen, T.; et al. Genetics of 35 blood and urine biomarkers in the UK Biobank. Nat. Genet. 2021, 53, 185–194.	https://gwas.mrcieu.ac.uk/
TG	UK Biobank	441016	European	Sinnott-Armstrong, N.; Tanigawa, Y.; Amar, D.; Mars, N.; Benner, C.; Aguirre, M.; Venkataraman, G.R.; Wainberg, M.; Ollila, H.M.; Kiiskinen, T.; et al. Genetics of 35 blood and urine biomarkers in the UK Biobank. Nat. Genet. 2021, 53, 185–194.	https://gwas.mrcieu.ac.uk/
apolipoprotein A-I (apoA-I)	UK Biobank	393193	European	Sinnott-Armstrong, N.; Tanigawa, Y.; Amar, D.; Mars, N.; Benner, C.; Aguirre, M.; Venkataraman, G.R.; Wainberg, M.; Ollila, H.M.; Kiiskinen, T.; et al. Genetics of 35 blood and urine biomarkers in the UK Biobank. Nat. Genet. 2021, 53, 185–194.	https://gwas.mrcieu.ac.uk/
apolipoprotein B (apoB)	UK Biobank	439214	European	Sinnott-Armstrong, N.; Tanigawa, Y.; Amar, D.; Mars, N.; Benner, C.; Aguirre, M.; Venkataraman, G.R.; Wainberg, M.; Ollila, H.M.; Kiiskinen, T.; et al. Genetics of 35 blood and urine biomarkers in the UK Biobank. Nat. Genet. 2021, 53, 185–194.	https://gwas.mrcieu.ac.uk/
eQTL data
eQTL for HMGCR	eQTLGen Consortium	Whole blood: 31684	Predominantly European	Võsa, U., Claringbould, A.,Franke, L, et al(2018): Unraveling the polygenic architecture of complex traits using blood eQTL meta-analysis. https://www.biorxiv.org/content/10.1101/447367v1	https://www.eqtlgen.org/cis-eqtls.html
eQTL in PCSK9, NPC1L1, and APOB	GTExV8	Whole blood: 755 Adipose Subcutaneous: 663	Predominantly European	GTEx Consortium, et al (2017): Genetic effects on gene expression across human tissues. https://www.ncbi.nlm.nih.gov/pubmed/29022597/	https://www.gtexportal.org/home/datasets
GWAS summary data
Vascular dementia (VaD)	FinnGen biobank	Number of cases:1118 Number of controls: 251154	European		https://www.finngen.fi/en/access_results

## Sheet: Table S2
Supplementary Table S2. Summarized data for the genetic variants associated with lipid-related traits via uvMR
Exposure	IVs	Chromosome	Base pair	Beta	SE	p	Effect allele	Other allele	Eaf	mean F-statistic
HDL-C	rs9989419	16	56985139	0.143765	0.00192633	1e-200	G	A	0.605917	5569.87
	rs9987289	8	9183358	0.0872902	0.00329366	9.1e-155	G	A	0.908737	702.382
	rs998584	6	43757896	-0.0341901	0.00190975	1.1e-71	A	C	0.482733	320.515
	rs9933509	16	53818167	-0.0140121	0.00191313	2.4e-13	C	T	0.413899	53.6435
	rs983663	18	19678537	-0.0143608	0.0022075	7.7e-11	G	A	0.251682	42.321
	rs968050	6	98574560	0.0136601	0.00190807	8.1e-13	T	C	0.48238	51.253
	rs9604045	13	113927208	0.0175151	0.00228914	2e-14	T	G	0.253572	58.5437
	rs9465693	6	20313120	-0.0121004	0.00208231	6.2e-09	A	C	0.304872	33.7683
	rs9347737	6	163740322	-0.0134784	0.00194715	4.4e-12	G	A	0.428295	47.9157
	rs9327468	5	127441861	-0.0148994	0.00221907	1.9e-11	A	C	0.755398	45.0812
	rs921919	12	125265201	-0.041665	0.00206455	1.4e-90	A	G	0.669162	407.279
	rs907866	2	20371380	-0.0183154	0.00191879	1.4e-21	A	G	0.445487	91.1125
	rs880674	4	2250109	0.0149836	0.00273775	4.4e-08	C	T	0.142056	29.9533
	rs830620	3	71679148	0.0149538	0.00193085	9.6e-15	T	C	0.415386	59.9799
	rs8014289	14	75377352	0.0151048	0.00192712	4.6e-15	G	A	0.562282	61.4345
	rs8007841	14	81647878	-0.0128714	0.0020177	1.8e-10	C	T	0.656767	40.6948
	rs80005209	8	19872339	-0.144197	0.00563687	2.5e-144	G	T	0.029614	654.39
	rs7924036	10	65191645	0.0138679	0.00190752	3.6e-13	T	G	0.503377	52.8547
	rs79153732	8	19662937	-0.0939759	0.00728238	4.2e-38	T	C	0.017377	166.528
	rs7853377	9	86552205	0.0152447	0.0023168	4.7e-11	G	A	0.216224	43.2973
	rs7826177	8	34406540	0.0112399	0.00197917	1.4e-08	C	T	0.635428	32.2522
	rs7817574	8	144302570	0.0331985	0.00243942	3.5e-42	C	T	0.185003	185.21
	rs78058190	2	219699999	-0.0783702	0.00490443	1.8e-57	A	G	0.050415	255.344
	rs77960347	18	47109955	0.290966	0.00830188	1e-200	G	A	0.013349	1228.38
	rs7794796	7	150540196	-0.016879	0.00203772	1.2e-16	T	C	0.332335	68.6127
	rs77767539	20	44801556	0.0452639	0.00821382	3.6e-08	A	G	0.014299	30.3678
	rs77605964	7	106962948	0.0170396	0.00227819	7.5e-14	A	G	0.226924	55.9421
	rs77320712	3	153238877	-0.0127407	0.0022658	1.9e-08	T	G	0.235452	31.6187
	rs7725218	5	1282414	-0.0122469	0.00201433	1.2e-09	A	G	0.338422	36.965
	rs76962725	1	224427133	-0.0277897	0.00508558	4.6e-08	A	G	0.037253	29.8598
	rs7665587	4	99796777	0.0139886	0.00193372	4.7e-13	C	T	0.42208	52.3313
	rs76602912	20	57459868	-0.0434476	0.00626364	4e-12	C	T	0.023789	48.1147
	rs76428106	13	28604007	-0.0624148	0.00878921	1.2e-12	C	T	0.01297	50.4284
	rs76247316	3	160082284	-0.0113866	0.0019083	2.4e-09	C	T	0.479856	35.6037
	rs7622114	3	36960660	0.0115687	0.00193999	2.5e-09	A	C	0.581017	35.5607
	rs7583067	2	100796850	0.0145946	0.00223535	6.6e-11	T	C	0.240114	42.6278
	rs75609851	8	19871080	0.170089	0.00964674	1.4e-69	A	G	0.010454	310.879
	rs75479205	6	7255610	0.0138981	0.00243644	1.2e-08	G	A	0.189496	32.5386
	rs75152587	16	56579961	-0.0944291	0.00849948	1.1e-28	T	G	0.012738	123.432
	rs74500135	9	106603816	0.0670758	0.010029	2.3e-11	C	T	0.009847	44.7318
	rs73455693	18	58027496	0.0280646	0.00510538	3.9e-08	A	G	0.037231	30.2177
	rs73243877	4	26047616	-0.0253693	0.00254909	2.5e-23	G	A	0.168086	99.0482
	rs73151974	7	134669523	-0.0161895	0.00273371	3.2e-09	T	C	0.144024	35.0721
	rs7305678	12	7681181	-0.0166218	0.00282868	4.2e-09	G	T	0.86624	34.5294
	rs72964564	3	123054770	-0.0125748	0.00220598	1.2e-08	C	A	0.250244	32.4937
	rs72926946	2	203477868	-0.0206565	0.00208041	3.1e-23	A	C	0.296376	98.5861
	rs7281183	21	16411667	-0.01272	0.00218963	6.3e-09	A	G	0.737142	33.7468
	rs72647336	8	126445055	-0.0440494	0.00442834	2.6e-23	A	G	0.056628	98.946
	rs7251640	19	18614935	0.0141902	0.00242811	5.1e-09	C	T	0.194019	34.1539
	rs7218647	17	76769605	0.0109209	0.00192614	1.4e-08	A	G	0.559041	32.1471
	rs7186799	16	57220016	-0.0220239	0.00190185	5.2e-31	C	A	0.437388	134.102
	rs7170463	15	41888918	0.018911	0.0020591	4.2e-20	G	A	0.311432	84.3479
	rs71647892	16	66997756	-0.0629378	0.00871711	5.2e-13	C	T	0.011842	52.1288
	rs71603401	4	18034463	-0.0154721	0.00279889	3.2e-08	G	A	0.136851	30.5581
	rs7158166	14	103241799	0.0140932	0.00195101	5.1e-13	C	T	0.593856	52.1795
	rs703966	10	80954251	0.0156949	0.00193455	4.9e-16	A	G	0.418881	65.8199
	rs7036107	9	92177897	-0.0122524	0.00194377	2.9e-10	G	A	0.51098	39.7331
	rs6939861	6	41703041	-0.0141972	0.00219368	9.7e-11	A	G	0.261916	41.885
	rs6934962	6	116322349	0.0161905	0.00194099	7.3e-17	T	C	0.40151	69.5783
	rs689183	11	110012143	-0.0158298	0.00220903	7.7e-13	T	G	0.751408	51.3508
	rs686030	9	15304782	0.0498241	0.00273951	6.5e-74	A	C	0.858823	330.775
	rs6824451	4	89723065	-0.0200444	0.00191167	1e-25	A	G	0.464071	109.941
	rs680321	18	29797958	0.0108517	0.00191658	1.5e-08	C	T	0.456556	32.0584
	rs6765484	3	50041313	0.0225207	0.00190864	3.9e-32	T	C	0.472827	139.225
	rs6762415	3	133478557	-0.0108964	0.00191344	1.2e-08	G	T	0.535292	32.4292
	rs676210	2	21231524	0.0592694	0.00235237	4.5e-140	A	G	0.205227	634.819
	rs6705285	2	66709468	0.0115225	0.00191933	1.9e-09	T	G	0.609068	36.0408
	rs6693842	1	66078405	0.013664	0.00199336	7.1e-12	C	T	0.364844	46.9877
	rs6469605	8	116601894	0.0316197	0.00191959	5.8e-61	T	C	0.568501	271.33
	rs6460894	7	12247330	-0.0121653	0.00201452	1.6e-09	C	T	0.339247	36.4672
	rs635769	6	139831981	0.0197069	0.00196961	1.4e-23	C	T	0.628046	100.11
	rs62428831	6	143247161	0.0178151	0.00275536	1e-10	C	T	0.141547	41.8042
	rs62246443	3	47172407	-0.0147841	0.00250895	3.8e-09	C	T	0.174261	34.7221
	rs62117487	19	8424060	0.0457487	0.00411744	1.1e-28	G	A	0.057038	123.453
	rs61805075	1	182136401	-0.0257183	0.00202534	6e-37	A	G	0.328694	161.246
	rs61748951	1	156038058	-0.0361204	0.00640878	1.7e-08	A	C	0.024073	31.7654
	rs61596977	8	95997165	-0.016225	0.00273721	3.1e-09	T	C	0.140363	35.1361
	rs61435086	8	19910292	0.089343	0.00862169	3.7e-25	C	T	0.012312	107.383
	rs6142206	20	33212055	-0.0161106	0.00193468	8.3e-17	A	G	0.42072	69.3434
	rs61352607	12	57839173	0.0306111	0.00222442	4.4e-43	T	G	0.240851	189.376
	rs6123685	20	55836040	0.0159783	0.0021911	3e-13	A	G	0.254745	53.1786
	rs6075860	20	21910266	-0.0128	0.00192763	3.1e-11	A	G	0.56549	44.0933
	rs6073958	20	44551855	-0.0609299	0.00239207	4.1e-143	C	T	0.198804	648.803
	rs6059958	20	30143278	0.0146541	0.00255516	9.7e-09	T	C	0.170742	32.8914
	rs6018652	20	46340974	0.0259271	0.0023605	4.6e-28	A	G	0.792888	120.642
	rs59781045	11	117095283	0.074037	0.0037879	4.5e-85	T	C	0.068117	382.033
	rs59104589	2	242237902	0.0150155	0.0019816	3.5e-14	T	C	0.358286	57.4179
	rs58298943	12	57391292	0.0201986	0.00342748	3.8e-09	T	C	0.084318	34.729
	rs58123204	12	53760162	-0.0184574	0.00264401	2.9e-12	G	A	0.153445	48.7321
	rs564832	11	30418246	-0.011708	0.00205455	1.2e-08	C	T	0.315005	32.4737
	rs55935382	7	50289669	0.01764	0.00203822	4.9e-18	A	C	0.32503	74.9023
	rs557933	1	234853268	0.0152472	0.00190783	1.3e-15	C	A	0.520349	63.8706
	rs549058	13	51201045	0.0171095	0.00293694	5.7e-09	T	G	0.120319	33.9379
	rs4969141	17	76391653	0.0296373	0.00191152	3.2e-54	T	C	0.489676	240.392
	rs4930352	11	66066993	0.0161709	0.00193852	7.3e-17	T	G	0.494128	69.587
	rs4917675	10	115799477	0.014562	0.00219637	3.4e-11	C	T	0.254595	43.9573
	rs4875043	8	144496772	-0.0149745	0.0023285	1.3e-10	C	A	0.216821	41.3573
	rs4871624	8	126629328	-0.020416	0.00211032	3.9e-22	G	T	0.286726	93.5933
	rs4871603	8	126480367	0.0360061	0.00199228	5.2e-73	T	C	0.653471	326.626
	rs4855582	3	108867705	0.0111652	0.00192369	6.5e-09	T	C	0.429621	33.687
	rs4804101	19	7220745	-0.0139042	0.00192656	5.3e-13	T	G	0.438994	52.0867
	rs4691379	4	157706904	0.0118717	0.00204326	6.2e-09	T	C	0.318939	33.7581
	rs4650994	1	178515312	-0.018056	0.00190061	2.1e-21	A	G	0.531842	90.252
	rs4614	11	118952371	-0.0178217	0.00193829	3.8e-20	G	A	0.406222	84.5397
	rs460428	22	29970989	-0.0143462	0.00226779	2.5e-10	C	T	0.230673	40.0192
	rs454968	5	112188456	0.0110337	0.00199469	3.2e-08	C	T	0.644812	30.5979
	rs4330777	16	57235644	-0.0197681	0.00189019	1.3e-25	A	G	0.474907	109.375
	rs429358	19	45411941	-0.0756554	0.00263871	8.71e-181	C	T	0.154325	822.047
	rs42125	7	72823777	-0.0398667	0.0070049	1.3e-08	G	A	0.023208	32.3904
	rs41272086	6	161008646	-0.0567846	0.00310319	8.5e-75	A	G	0.105505	334.845
	rs4074448	15	63888495	0.015131	0.00196355	1.3e-14	A	G	0.589254	59.3815
	rs3924313	12	125328375	-0.0239168	0.00204761	1.6e-31	A	G	0.322221	136.431
	rs3814883	16	29994922	-0.0153035	0.00189151	5.9e-16	T	C	0.482467	65.4582
	rs3794752	17	53382829	0.0128326	0.00213876	2e-09	C	T	0.280634	36.0002
	rs3768321	1	40035928	-0.0452296	0.00239482	1.5e-79	T	G	0.196691	356.697
	rs3747973	1	205677148	0.0141665	0.00193802	2.7e-13	G	A	0.592542	53.4329
	rs3746915	21	43718792	0.0108813	0.00194098	2.1e-08	G	A	0.580939	31.4282
	rs3745683	19	11348521	-0.0546353	0.00362928	3.2e-51	A	G	0.074638	226.624
	rs3732356	3	119529113	-0.0299026	0.00386524	1e-14	T	G	0.933782	59.8501
	rs367070	19	54800500	0.0417949	0.00228709	1.3e-74	G	A	0.225571	333.949
	rs34940374	7	150331377	-0.0170378	0.00247025	5.3e-12	A	G	0.182973	47.5713
	rs343	8	19810787	0.133778	0.00346421	1e-200	A	C	0.08307	1491.29
	rs34138141	17	40781561	-0.0175318	0.00212461	1.6e-16	T	G	0.280655	68.0918
	rs34045894	10	33967489	-0.0172909	0.00262706	4.6e-11	A	G	0.15624	43.3207
	rs330089	8	9149612	0.0204692	0.00318925	1.4e-10	C	T	0.098081	41.1931
	rs32578	5	149211868	0.0133235	0.00206513	1.1e-10	A	G	0.309015	41.6238
	rs3184504	12	111884608	0.0265387	0.00190452	3.9e-44	C	T	0.517322	194.173
	rs308	8	19817476	0.12651	0.00669305	1.1e-79	G	T	0.020639	357.274
	rs3027167	17	8059117	-0.0124258	0.00205083	1.4e-09	T	C	0.682038	36.7104
	rs2965169	19	45251156	0.0120831	0.00195448	6.3e-10	C	A	0.388738	38.2203
	rs2963468	5	158003020	-0.0196653	0.00226256	3.6e-18	G	A	0.235297	75.5442
	rs2943645	2	227099180	-0.0434706	0.00198833	5.9e-106	T	C	0.646663	477.985
	rs2925979	16	81534790	0.037299	0.00205659	1.6e-73	C	T	0.699999	328.927
	rs2910949	5	39522481	0.0133996	0.00199892	2e-11	G	T	0.354888	44.9358
	rs286965	5	153360230	-0.0134141	0.00197553	1.1e-11	C	T	0.632135	46.1058
	rs28362901	15	74712937	-0.0238891	0.00336295	1.2e-12	A	C	0.088332	50.4613
	rs2814982	6	34546560	-0.0275938	0.00314209	1.6e-18	T	C	0.102216	77.1233
	rs2804894	10	33647091	0.0173063	0.0021841	2.3e-15	A	G	0.734831	62.7861
	rs2800710	6	127452581	-0.0202674	0.00190382	1.8e-26	C	T	0.51821	113.33
	rs2792751	10	113940329	-0.0360998	0.0021336	3.2e-64	C	T	0.725031	286.275
	rs2750411	6	139226630	-0.0108405	0.0019091	1.4e-08	G	T	0.4919	32.2434
	rs2740488	9	107661742	-0.0686515	0.00216181	1e-200	C	A	0.265328	1008.47
	rs2726111	7	36179061	-0.0148127	0.00202533	2.6e-13	G	A	0.667447	53.4905
	rs2723065	2	65279414	0.0149623	0.00196239	2.4e-14	G	A	0.376773	58.1334
	rs267738	1	150940625	0.0214529	0.00229757	9.9e-21	G	T	0.219354	87.1835
	rs2645979	12	84017043	0.0114281	0.00198606	8.7e-09	A	G	0.357369	33.1103
	rs2642438	1	220970028	0.0276562	0.00207854	2.1e-40	G	A	0.702698	177.039
	rs254562	5	134441457	-0.0114752	0.00194192	3.4e-09	G	A	0.409277	34.9187
	rs2520096	9	136919416	0.0147205	0.00215114	7.7e-12	G	A	0.270192	46.8282
	rs2516331	1	212416989	0.0126835	0.00196658	1.1e-10	A	C	0.375524	41.5963
	rs2435307	18	21127910	0.0162767	0.00190927	1.5e-17	T	C	0.48634	72.6772
	rs2417125	9	131562232	-0.0131524	0.00211658	5.2e-10	G	A	0.284014	38.6136
	rs2362541	2	30478453	-0.0108666	0.00190325	1.1e-08	G	T	0.507519	32.5984
	rs235314	21	46271452	-0.0177425	0.00191993	2.4e-20	T	C	0.532212	85.4002
	rs2339234	5	170612546	-0.0118996	0.00205717	7.3e-09	A	G	0.683004	33.4599
	rs2307111	5	75003678	0.0190053	0.0019521	2.1e-22	C	T	0.394924	94.7862
	rs2302263	11	64021821	-0.0364373	0.00335268	1.6e-27	T	C	0.088695	118.116
	rs2298632	1	23710475	0.0144252	0.00193744	9.7e-14	T	C	0.498073	55.4354
	rs2298624	18	47429022	0.0300361	0.00280916	1.1e-26	T	C	0.132532	114.323
	rs2298214	1	935222	-0.01241	0.00194099	1.6e-10	A	C	0.577365	40.8787
	rs2297409	9	107576246	-0.0333565	0.00240571	1e-43	A	G	0.194635	192.254
	rs2290866	8	105907833	-0.0119226	0.00218189	4.6e-08	T	C	0.253153	29.8591
	rs2271308	17	37817482	0.0278808	0.002156	3e-38	C	T	0.733051	167.23
	rs2268840	3	185931174	0.0173197	0.00226775	2.2e-14	C	T	0.22846	58.3298
	rs2256609	22	21925017	-0.0328881	0.00244058	2.2e-41	G	A	0.189238	181.59
	rs2247355	8	103876780	0.0206138	0.00245873	5.1e-17	T	C	0.182679	70.2901
	rs2237035	4	55526251	0.0139172	0.00195824	1.2e-12	T	G	0.385886	50.5094
	rs2236464	21	46898174	-0.0155836	0.00235595	3.7e-11	C	T	0.212102	43.7526
	rs2196808	2	111839021	0.0128638	0.00215716	2.5e-09	C	T	0.731961	35.561
	rs2159607	3	52501451	-0.0239454	0.00243213	7.2e-23	T	G	0.810874	96.9328
	rs2155220	11	76266172	-0.0105204	0.00191315	3.8e-08	T	C	0.437951	30.2389
	rs2111216	12	110010151	0.0213297	0.00194338	5e-28	G	A	0.593934	120.463
	rs2098918	4	37151533	0.0118698	0.00191595	5.8e-10	T	C	0.45513	38.3812
	rs2098368	7	36269284	-0.0116029	0.00192757	1.8e-09	T	C	0.54591	36.2337
	rs2068888	10	94839642	0.0191803	0.0019152	1.3e-23	A	G	0.450441	100.296
	rs2066714	9	107586753	0.0465396	0.00284369	3.4e-60	C	T	0.128622	267.843
	rs201441	7	101737327	-0.0109672	0.0019342	1.4e-08	G	T	0.580679	32.1506
	rs1970811	10	126696496	-0.0116112	0.00191759	1.4e-09	C	T	0.457743	36.6642
	rs1955512	14	33175822	0.0109986	0.00197003	2.4e-08	A	G	0.575802	31.1694
	rs188502504	5	131121165	-0.0316669	0.00510538	5.6e-10	C	T	0.03643	38.4729
	rs1862205	5	108656635	0.0113186	0.00194381	5.8e-09	A	G	0.404725	33.9061
	rs183906992	7	95011948	0.0294539	0.00474735	5.5e-10	C	T	0.04275	38.4931
	rs1771582	1	161614490	0.0129458	0.00197832	6e-11	G	T	0.557402	42.8218
	rs17713879	2	254215	0.0138956	0.00197564	2e-12	A	G	0.364695	49.4697
	rs1760940	14	20938251	0.0121791	0.0022157	3.9e-08	C	A	0.24702	30.214
	rs174566	11	61592362	-0.0562241	0.00199551	1.2e-174	G	A	0.350061	793.848
	rs17326656	2	48962291	-0.0223923	0.00223885	1.5e-23	T	G	0.238666	100.034
	rs17309930	11	27748493	-0.0218885	0.00235533	1.5e-20	A	C	0.205132	86.3631
	rs17124112	14	88605509	-0.020798	0.00352939	3.8e-09	A	C	0.07993	34.7251
	rs16928809	11	2936952	-0.0262633	0.00329991	1.7e-15	A	G	0.093089	63.3424
	rs1601934	15	58671721	-0.10102	0.00207033	1e-200	A	G	0.687495	2380.87
	rs1534696	7	26397239	0.0166573	0.0019113	2.9e-18	A	C	0.540992	75.9541
	rs150861794	13	109003805	-0.0446978	0.00759758	4e-09	T	C	0.018301	34.6116
	rs150844304	15	43726625	-0.090543	0.00599215	1.4e-51	C	A	0.025907	228.32
	rs150237291	18	46781014	0.0453058	0.00656295	5.1e-12	C	T	0.021799	47.6551
	rs150224153	20	43008981	-0.0934689	0.00575879	3.1e-59	T	C	0.029665	263.434
	rs147627829	6	34335088	-0.0535763	0.00468184	2.5e-30	A	G	0.043706	130.952
	rs145947882	17	41809207	-0.164935	0.00609907	4.7e-161	C	A	0.026042	731.305
	rs1446585	2	136407479	0.0167827	0.00217146	1.1e-14	G	A	0.244295	59.7338
	rs144311893	19	45423944	0.0809615	0.0066916	1.1e-33	T	C	0.022086	146.385
	rs144033177	20	571467	-0.05557	0.0078389	1.4e-12	C	A	0.015822	50.254
	rs1431659	8	73439070	0.0127918	0.00214104	2.3e-09	G	A	0.728463	35.6955
	rs142288236	8	19845612	-0.0776969	0.00795635	1.6e-22	T	C	0.01469	95.3629
	rs141469619	11	116714293	-0.203479	0.0101857	8.7e-89	G	A	0.009879	399.078
	rs141440048	1	182328198	0.0436872	0.00756751	7.8e-09	T	C	0.017665	33.3275
	rs1412234	9	28410683	-0.011989	0.00203583	3.9e-09	C	T	0.327133	34.6803
	rs1411432	9	16728532	-0.0139757	0.00245569	1.3e-08	C	A	0.186415	32.3892
	rs141062196	17	495327	-0.0188553	0.00241089	5.2e-15	A	G	0.194436	61.1663
	rs140164052	16	57542242	-0.0417453	0.00540785	1.2e-14	A	G	0.031786	59.589
	rs140064750	8	19906156	-0.0440664	0.00634192	3.7e-12	C	T	0.024546	48.2807
	rs1395221	4	24626903	-0.0111888	0.00195359	1e-08	T	G	0.397646	32.802
	rs1383732	4	103953389	-0.0152024	0.00267698	1.4e-08	G	A	0.149969	32.2503
	rs1349852	4	69533217	0.0112127	0.00192565	5.8e-09	C	A	0.475293	33.9052
	rs13389219	2	165528876	0.0277324	0.00194608	4.5e-46	T	C	0.392619	203.074
	rs13379043	14	74250126	0.0198764	0.00216717	4.7e-20	C	T	0.28042	84.1181
	rs13269725	8	72459889	-0.0259912	0.00353253	1.9e-13	G	A	0.078342	54.1353
	rs13235365	7	6456091	0.0258181	0.00214379	2.1e-33	T	C	0.273616	145.039
	rs13144151	4	146403165	0.0178695	0.00270341	3.8e-11	G	A	0.850001	43.6919
	rs13137144	4	967445	0.0164073	0.00192431	1.5e-17	A	G	0.461454	72.6983
	rs13111599	4	83917037	0.0127921	0.00216664	3.5e-09	G	A	0.737196	34.8586
	rs13107325	4	103188709	-0.080346	0.00362445	7e-109	T	C	0.074942	491.41
	rs13066793	3	87037543	0.0220769	0.00332887	3.3e-11	G	A	0.090115	43.9828
	rs12998038	2	42602387	0.0131918	0.0021847	1.6e-09	T	C	0.258702	36.4607
	rs12986742	2	58975143	-0.0106002	0.00191315	3e-08	C	T	0.475905	30.6994
	rs12928099	16	15150505	0.0214263	0.00206787	3.7e-25	A	C	0.29612	107.361
	rs12926854	16	85951258	0.0122457	0.00213341	9.5e-09	G	A	0.269909	32.9472
	rs12921195	16	4677604	-0.0166869	0.00281852	3.2e-09	A	C	0.139503	35.0517
	rs12781812	10	101891222	0.0107203	0.00194289	3.4e-08	T	G	0.400915	30.4451
	rs12740811	1	171416256	-0.0184297	0.00326047	1.6e-08	G	A	0.094047	31.9504
	rs12740374	1	109817590	0.0288629	0.00229106	2.2e-36	T	G	0.221008	158.711
	rs12705595	7	109103912	0.0110554	0.00198306	2.5e-08	A	G	0.37337	31.0797
	rs12686780	9	95382297	-0.0161688	0.00251034	1.2e-10	T	C	0.174998	41.4849
	rs12575456	11	47326073	0.0445866	0.00203342	1.4e-106	A	G	0.321829	480.789
	rs12475332	2	227232047	0.012897	0.0021638	2.5e-09	G	T	0.261038	35.5257
	rs12462109	19	52343496	-0.0159539	0.00210812	3.8e-14	T	C	0.287067	57.2721
	rs1240820	6	16825137	0.0131835	0.00210043	3.5e-10	A	G	0.293164	39.3954
	rs1225053	3	131642852	-0.0150376	0.00216684	3.9e-12	C	T	0.264492	48.1619
	rs12229011	12	125083714	-0.0259933	0.00322614	7.8e-16	T	C	0.097467	64.9167
	rs12205778	6	42914749	0.0162321	0.00217549	8.6e-14	A	G	0.258895	55.6718
	rs12046972	1	219673143	-0.0148213	0.00191599	1e-14	C	T	0.564083	59.8392
	rs117847213	11	111421906	0.0295589	0.0048659	1.2e-09	G	A	0.040812	36.902
	rs117762989	11	62603644	-0.0268923	0.00468314	9.3e-09	T	C	0.043022	32.9748
	rs117291242	11	380315	-0.0315912	0.00506695	4.5e-10	T	C	0.036567	38.8722
	rs117230571	13	41689067	-0.0266417	0.00363105	2.2e-13	G	A	0.076958	53.8343
	rs11704977	22	30900128	0.0147253	0.00268902	4.3e-08	T	C	0.149996	29.9875
	rs116857878	16	57052583	0.0482826	0.00697677	4.5e-12	T	C	0.020363	47.893
	rs116843064	19	8429323	0.206178	0.0069176	3.4e-195	A	G	0.019327	888.329
	rs1168114	1	63156043	0.0155365	0.00199819	7.5e-15	G	A	0.65237	60.4551
	rs11664369	18	57739072	-0.0229777	0.00215861	1.8e-26	T	C	0.267061	113.309
	rs11640494	16	88029685	-0.015349	0.00189969	6.5e-16	A	G	0.456655	65.2822
	rs11631178	15	58714787	0.0211366	0.0031235	1.3e-11	C	T	0.103811	45.7917
	rs11614202	12	9097523	0.0227709	0.00261356	3e-18	G	A	0.841919	75.9094
	rs116006942	5	53405314	-0.02987	0.00403491	1.3e-13	A	G	0.060798	54.8028
	rs115912456	5	82815158	0.028084	0.0047884	4.5e-09	G	A	0.041265	34.3983
	rs11429307	5	55857025	0.0308032	0.00243282	9.7e-37	G	GT	0.808907	160.314
	rs113966472	16	56445194	0.0324769	0.00554864	4.8e-09	A	G	0.032408	34.2591
	rs113740515	12	123199410	0.0377752	0.00233951	1.2e-58	A	G	0.209452	260.714
	rs1132274	20	17596155	-0.0217809	0.00263979	1.6e-16	A	C	0.154029	68.079
	rs11254464	10	17265447	0.0127581	0.00193081	3.9e-11	C	T	0.423107	43.6609
	rs112350227	2	161091633	-0.0319379	0.00582274	4.1e-08	T	C	0.02764	30.0855
	rs11218738	11	122524951	0.0234498	0.00219817	1.4e-26	A	G	0.249489	113.804
	rs112001035	17	66823805	-0.0466304	0.00408312	3.3e-30	A	G	0.060492	130.423
	rs11171710	12	56368078	-0.0114694	0.00192933	2.8e-09	A	G	0.44814	35.3401
	rs111363680	12	124167271	0.0328171	0.00592877	3.1e-08	T	C	0.031354	30.6388
	rs11045171	12	20470199	0.0283661	0.00240558	4.3e-32	G	A	0.197605	139.046
	rs11021232	11	95320808	-0.0167378	0.00248678	1.7e-11	C	T	0.18096	45.3025
	rs11009262	10	33448764	-0.0233289	0.00409245	1.2e-08	T	G	0.057318	32.4954
	rs1083470	2	147871114	0.0115829	0.00195974	3.4e-09	A	G	0.615717	34.9331
	rs10786114	10	95309022	0.0238735	0.00288231	1.2e-16	T	C	0.874851	68.6042
	rs10774439	12	6731818	0.020513	0.00248318	1.4e-16	A	G	0.814891	68.2405
	rs10750766	11	65473798	-0.0185663	0.00209928	9.2e-19	A	C	0.709866	78.2186
	rs1055582	4	39700173	0.0140251	0.00190973	2.1e-13	T	C	0.505231	53.9347
	rs10513801	3	185822353	-0.0303325	0.00277034	6.7e-28	G	T	0.137151	119.881
	rs10504477	8	71338185	-0.0150661	0.00193097	6.1e-15	C	T	0.412192	60.8766
	rs1047891	2	211540507	-0.0189073	0.00204367	2.2e-20	A	C	0.315582	85.5929
	rs1045241	5	118729286	0.0164171	0.00215576	2.6e-14	T	C	0.271252	57.9952
	rs10233430	7	1051664	-0.0204944	0.00192772	2.1e-26	C	T	0.427019	113.027
	rs10162642	15	58577163	-0.0479223	0.0023419	4.6e-93	A	G	0.211684	418.734
	rs10053349	5	78475423	0.0120071	0.00195336	7.9e-10	C	T	0.390258	37.7843
	rs10031010	4	120035180	0.0138083	0.00246597	2.1e-08	A	G	0.184617	31.3549
LDL-C	rs9987289	8	9183358	0.0453824	0.00362169	5.10035e-36	G	A	0.908808	157.019
	rs9894946	17	7571080	-0.0173333	0.00290132	2.30001e-09	G	A	0.841112	35.692
	rs9884390	4	69373407	0.0251489	0.00249163	5.90065e-24	C	T	0.234121	101.876
	rs9834932	3	32535382	-0.0322172	0.00366408	1.50003e-18	G	A	0.08883	77.3118
	rs960596	22	41393520	0.0135068	0.00221758	1.09999e-09	T	C	0.33932	37.0976
	rs9496567	6	100602753	-0.0174316	0.00243272	7.8001e-13	A	G	0.243458	51.3441
	rs9471968	6	42905235	-0.0116148	0.00209345	2.90001e-08	G	A	0.545696	30.7821
	rs934197	2	21267461	0.0832348	0.00220298	1e-200	A	G	0.33544	1427.54
	rs9289196	3	122268506	0.0173702	0.00275673	2.99999e-10	C	T	0.173786	39.7028
	rs880315	1	10796866	-0.0152225	0.00220678	5.30029e-12	C	T	0.34024	47.5832
	rs869412	7	1074134	-0.0142314	0.00250093	1.29999e-08	C	T	0.225684	32.3811
	rs79828839	10	52352431	0.0144987	0.00261498	2.90001e-08	T	C	0.198784	30.7412
	rs79220007	6	26098474	-0.057338	0.00392142	1.99986e-48	C	T	0.076135	213.795
	rs78508096	12	9074706	0.0176869	0.00249323	1.29987e-12	A	G	0.226194	50.3244
	rs77960347	18	47109955	0.0706209	0.00908667	7.70016e-15	G	A	0.013351	60.4028
	rs7776054	6	135418916	-0.0162316	0.00237493	8.19974e-12	G	A	0.261313	46.7112
	rs77542162	17	67081278	0.128484	0.0070401	2.09991e-74	G	A	0.022495	333.074
	rs7746081	6	16126934	-0.0234725	0.00226701	4.00037e-25	A	G	0.304113	107.204
	rs7734476	5	122848876	0.0187595	0.00209401	3.29989e-19	A	G	0.550077	80.2574
	rs7707394	5	74472939	0.040448	0.00217281	2.39994e-77	A	G	0.357329	346.538
	rs76468627	10	116033892	-0.0217346	0.00394926	3.69999e-08	T	C	0.07587	30.2881
	rs7569317	2	203527979	0.017881	0.00208232	8.9002e-18	C	T	0.530638	73.7375
	rs72911393	17	76391005	-0.0182619	0.00294119	5.30005e-10	T	C	0.147618	38.5519
	rs7241918	18	47160953	0.0157471	0.00274939	1e-08	T	G	0.82411	32.8041
	rs7202323	16	72217113	-0.0255365	0.00247732	6.4998e-25	G	T	0.229741	106.257
	rs71311871	3	58420613	-0.0283073	0.00378458	7.50067e-14	G	A	0.083052	55.945
	rs7108486	11	5677158	-0.0386029	0.00692024	2.39999e-08	C	T	0.023721	31.117
	rs6874202	5	156391628	0.032331	0.00216292	1.59993e-50	C	T	0.634269	223.438
	rs6709904	2	44080324	-0.043441	0.00329601	1.10002e-39	G	A	0.112585	173.709
	rs6680227	1	109798914	-0.0746581	0.00563322	4.30031e-40	A	G	0.035237	175.647
	rs6602912	13	114546549	0.0221997	0.00231001	7.19946e-22	G	T	0.284854	92.3563
	rs6560499	9	78730766	-0.0122028	0.00212189	8.9e-09	A	G	0.576007	33.073
	rs6544713	2	44073881	-0.0537152	0.00222274	5.00035e-129	C	T	0.676864	584.006
	rs6495122	15	75125645	0.0143852	0.00211976	1.20005e-11	C	A	0.591279	46.0531
	rs6475606	9	22081850	-0.0202689	0.00208367	2.29985e-22	T	C	0.48447	94.6243
	rs62033400	16	53811788	-0.0144167	0.00213447	1.39991e-11	G	A	0.394662	45.6196
	rs61988556	14	73439258	-0.0224158	0.00372109	1.7e-09	C	T	0.086142	36.2884
	rs61754230	12	72179446	0.0430117	0.00748441	9.09997e-09	T	C	0.019784	33.0262
	rs61003864	7	36189798	0.0155966	0.00267616	5.60003e-09	C	T	0.187128	33.9653
	rs6074012	20	44700166	0.0116537	0.00208962	2.39999e-08	C	T	0.523914	31.1023
	rs60612724	7	98874892	0.0323852	0.00541912	2.30001e-09	G	A	0.038647	35.7138
	rs6031587	20	43038249	-0.0256479	0.00413761	5.69994e-10	T	C	0.071963	38.4242
	rs597808	12	111973358	0.0271066	0.00209151	2.09991e-38	G	A	0.515915	167.969
	rs5843957	21	40698345	0.0137065	0.00210922	8.10028e-11	TG	T	0.570884	42.2289
	rs56236159	2	3636478	0.0177139	0.00307979	8.79995e-09	G	T	0.13149	33.0816
	rs55831924	8	145031968	0.0156761	0.0021829	6.89922e-13	T	C	0.361448	51.5713
	rs55714927	17	7080316	-0.0264314	0.00265551	2.39994e-23	T	C	0.190364	99.0705
	rs55637835	1	55466303	-0.0187129	0.00324835	8.40001e-09	T	C	0.120881	33.1861
	rs556107	1	234853059	0.0351712	0.00208846	1.20005e-63	T	C	0.523338	283.61
	rs4970834	1	109814880	-0.105303	0.00268179	1e-200	T	C	0.186642	1541.81
	rs4954192	2	135632981	0.0146629	0.00213654	6.70039e-12	T	C	0.373474	47.0997
	rs4930163	11	65591348	0.0174597	0.00285203	9.20005e-10	A	G	0.159456	37.477
	rs472495	1	55521313	0.0425743	0.00218093	7.29962e-85	T	G	0.648959	381.076
	rs4666384	2	20575012	-0.016633	0.00224003	1.10002e-13	G	A	0.678914	55.1358
	rs440677	19	11285390	-0.0159238	0.00215434	1.50003e-13	A	G	0.623063	54.6342
	rs438568	20	12958687	0.0124777	0.00213986	5.49997e-09	G	A	0.609246	34.0015
	rs4307732	11	126244955	0.0448315	0.0033985	9.79941e-40	A	G	0.105876	174.017
	rs4263041	19	45438643	-0.0699797	0.00251019	4.89779e-171	G	A	0.283209	777.197
	rs4148826	7	87074419	-0.0157917	0.0027233	6.69993e-09	C	T	0.18045	33.6253
	rs3823376	6	29944184	0.0172774	0.0020812	1e-16	T	C	0.502179	68.9174
	rs3822855	6	116316882	0.0178418	0.00212447	4.49987e-17	T	G	0.40166	70.5304
	rs3780181	9	2640759	-0.0278983	0.00418323	2.60016e-11	G	A	0.067627	44.4766
	rs3732359	3	119536429	-0.0173556	0.00252038	5.70033e-12	A	G	0.78012	47.4184
	rs35882350	12	623129	0.0139684	0.00237417	4e-09	G	A	0.261067	34.6154
	rs35511051	19	58665817	-0.0217862	0.00254546	1.10002e-17	A	C	0.209985	73.2538
	rs34568880	6	31514448	0.0560827	0.00908804	6.80002e-10	T	C	0.013313	38.0818
	rs34265667	8	41542093	-0.0320529	0.00575731	2.59998e-08	A	G	0.033987	30.9953
	rs3127580	6	160710851	0.0357031	0.00287572	2.19989e-35	T	C	0.155131	154.141
	rs3104412	6	32585967	-0.0189061	0.00209423	1.80011e-19	G	A	0.451531	81.4995
	rs28814720	8	141988687	0.0121747	0.00215073	1.5e-08	G	A	0.519766	32.0439
	rs28631087	1	235109214	-0.0161901	0.0025459	2e-10	C	T	0.21274	40.4405
	rs28615248	8	55451193	0.0184347	0.00263568	2.70023e-12	C	T	0.196095	48.92
	rs28406917	7	21449451	0.0119057	0.00211433	1.79999e-08	T	C	0.427624	31.7077
	rs2820226	6	35045281	-0.012864	0.00209731	8.60003e-10	A	G	0.451903	37.6207
	rs2745353	6	127452935	0.0126963	0.00208336	1.09999e-09	T	C	0.5181	37.1386
	rs2740488	9	107661742	-0.0252452	0.00236503	1.29987e-26	C	A	0.265466	113.942
	rs2738447	19	11227480	0.0422734	0.00211024	2.90001e-89	C	A	0.592612	401.301
	rs2737265	8	116667634	-0.0202743	0.002322	2.49977e-18	G	A	0.28046	76.2373
	rs2642438	1	220970028	0.0253218	0.00227308	8.00018e-29	G	A	0.702657	124.097
	rs2618566	20	17844684	-0.0249198	0.00219993	9.60064e-30	T	G	0.659861	128.313
	rs2611867	17	45664861	-0.0265838	0.00209023	4.70002e-37	G	A	0.513941	161.751
	rs2391825	13	111035483	-0.0129848	0.00233356	2.59998e-08	A	G	0.279219	30.9623
	rs2287622	2	169830328	-0.0211572	0.00212931	2.90001e-23	G	A	0.602794	98.7276
	rs2256814	20	62373983	0.0152618	0.00262512	6.1e-09	A	G	0.197877	33.7997
	rs2250802	10	113921354	-0.0181939	0.00233224	6.09958e-15	A	G	0.72434	60.8562
	rs2238162	13	32959199	-0.0165008	0.00208847	2.80027e-15	T	C	0.522955	62.4243
	rs2160994	12	50650057	0.0182581	0.00218417	6.29941e-17	C	T	0.647494	69.8776
	rs2073547	7	44582331	0.0355498	0.00267287	2.29985e-40	G	A	0.184007	176.896
	rs2068888	10	94839642	-0.0192081	0.00209421	4.60045e-20	A	G	0.450695	84.1256
	rs2066714	9	107586753	0.0210151	0.00310964	1.39991e-11	C	T	0.128775	45.6712
	rs2043085	15	58680954	-0.017018	0.00214177	1.9002e-15	C	T	0.612225	63.1352
	rs200046586	19	45241248	0.309188	0.00782788	1e-200	C	CA	0.981093	1560.12
	rs183130	16	56991363	-0.0329541	0.00223034	2.09991e-49	T	C	0.323808	218.312
	rs1801689	17	64210580	0.061862	0.00605788	1.80011e-24	C	A	0.030551	104.281
	rs17569873	20	62896110	0.0171196	0.00260335	4.79954e-11	T	C	0.201299	43.2436
	rs17476364	10	71094504	-0.0216418	0.00335937	1.2e-10	C	T	0.108328	41.5022
	rs174564	11	61588305	-0.0318977	0.0021896	4.49987e-48	G	A	0.348557	212.221
	rs17050272	2	121306440	-0.0205597	0.00211549	2.49977e-22	A	G	0.409275	94.4521
	rs1556562	1	93034023	0.0190249	0.00248903	2.09991e-14	T	G	0.790033	58.4231
	rs1551891	19	45231821	-0.173628	0.00366029	1e-200	A	G	0.088107	2250.13
	rs150474434	2	118845121	-0.0347623	0.00347063	1.29987e-23	A	G	0.101353	100.323
	rs146534110	6	160578069	0.0680211	0.00910045	7.8001e-14	T	G	0.013304	55.8678
	rs146433259	5	34713792	-0.0569699	0.0103828	4.09996e-08	T	C	0.011736	30.1066
	rs145730801	14	94768196	0.0359995	0.00516918	3.29989e-12	C	T	0.044378	48.5009
	rs13121616	4	7212389	0.0128507	0.00226135	1.29999e-08	G	A	0.693553	32.2937
	rs13108218	4	3443931	-0.0177871	0.0021598	1.80011e-16	G	A	0.614867	67.824
	rs13107325	4	103188709	-0.0248331	0.00396439	3.79997e-10	T	C	0.074895	39.2382
	rs13076933	3	12327431	-0.020994	0.00239027	1.59993e-18	G	T	0.259454	77.143
	rs13020929	2	44327463	0.0145846	0.00209518	3.40017e-12	A	G	0.4567	48.4559
	rs12916	5	74656539	0.0621175	0.00212705	1.69824e-187	C	T	0.400537	852.85
	rs1260326	2	27730940	-0.0347299	0.00212546	5.10035e-60	C	T	0.604443	266.994
	rs1250258	2	216300185	0.0137745	0.00236771	5.99998e-09	T	C	0.736649	33.845
	rs12471768	2	64928603	0.0135999	0.00228112	2.5e-09	C	T	0.704119	35.5447
	rs12445804	16	11706100	0.0229888	0.0040052	9.49992e-09	A	G	0.074901	32.9446
	rs1229984	4	100239319	0.0525797	0.00633356	1e-16	C	T	0.972799	68.9192
	rs12246352	10	124705307	0.0257335	0.00342791	6.00067e-14	G	A	0.103895	56.3558
	rs12208357	6	160543148	0.0569843	0.00409617	5.40008e-44	T	C	0.070102	193.533
	rs12162782	22	50853626	0.0129592	0.00219352	3.50002e-09	G	T	0.344365	34.9038
	rs1183851	1	62958658	0.024377	0.00213943	4.49987e-30	C	T	0.395544	129.827
	rs118039278	6	160985526	0.0835056	0.00388533	1.79887e-102	A	G	0.078672	461.929
	rs117733303	6	160922870	0.0838178	0.00773844	2.39994e-27	G	A	0.018422	117.318
	rs117139027	8	29024943	-0.0571106	0.00792993	5.90065e-13	A	G	0.017594	51.8674
	rs116734477	5	52095024	-0.0473368	0.0052819	3.19963e-19	T	C	0.040837	80.3188
	rs11621792	14	24871926	0.0191489	0.00211033	1.10002e-19	T	C	0.452867	82.3355
	rs11601507	11	5701074	0.0322012	0.00404981	1.80011e-15	A	C	0.069468	63.223
	rs11591147	1	55505647	-0.348456	0.00793088	1e-200	T	G	0.017468	1930.43
	rs11568318	2	234665498	0.0256951	0.00417849	7.79992e-10	A	C	0.066246	37.8148
	rs115458560	1	110061974	-0.0503391	0.0077049	6.4003e-11	C	T	0.018563	42.6852
	rs113177823	3	132217703	-0.0411737	0.00466039	1e-18	A	G	0.054136	78.054
	rs11099097	4	81167309	-0.0181876	0.00230231	2.80027e-15	T	C	0.291333	62.4055
	rs11065385	12	121423386	-0.0244904	0.00225744	1.99986e-27	G	A	0.690891	117.695
	rs11014204	10	18720845	0.0137924	0.00233007	3.2e-09	T	C	0.280227	35.0382
	rs10910476	1	234734956	0.0123938	0.00210193	3.69999e-09	T	C	0.555163	34.7674
	rs10832963	11	18664241	0.0173059	0.00239616	5.10035e-13	G	T	0.744224	52.1623
	rs10448340	9	139320069	-0.0150594	0.00223737	1.69981e-11	G	T	0.319765	45.3043
	rs10231941	7	100532540	0.0198565	0.00272709	3.29989e-13	C	T	0.177717	53.0159
	rs1016988	5	131744574	-0.0174377	0.00265087	4.79954e-11	C	T	0.190907	43.2715
	rs1010759	20	34147630	-0.0231042	0.00300476	1.50003e-14	A	G	0.140367	59.1238
TG	rs998584	6	43757896	0.0401182	0.00198999	2.19989e-90	A	C	0.482727	406.426
	rs9902027	17	7440984	-0.0151609	0.00238645	2.1e-10	T	C	0.77437	40.3595
	rs9889402	17	73364216	0.0122827	0.00222926	3.59998e-08	A	G	0.728192	30.3575
	rs9831084	3	37025661	-0.0118516	0.00199656	2.90001e-09	C	T	0.461922	35.2362
	rs970069	5	140888248	0.0162322	0.00243455	2.60016e-11	T	C	0.212039	44.4547
	rs9584870	13	99245866	-0.0123562	0.00210377	4.30002e-09	C	T	0.366179	34.4964
	rs9561643	13	95253131	0.0167149	0.00214481	6.4998e-15	C	A	0.314726	60.7337
	rs9436661	1	62904575	-0.0777322	0.00207793	1e-200	G	T	0.352919	1399.39
	rs9425589	1	172355276	-0.0137618	0.00200182	6.20012e-12	A	G	0.566781	47.2607
	rs9376511	6	140611419	-0.0154993	0.00246511	3.2e-10	G	A	0.203288	39.5323
	rs9373056	6	133797208	-0.0122839	0.00212321	7.19996e-09	T	C	0.320263	33.4724
	rs921971	18	57861663	0.01565	0.00225602	4.00037e-12	C	T	0.265901	48.1219
	rs880315	1	10796866	-0.011772	0.00210497	2.19999e-08	C	T	0.340211	31.2758
	rs867939	18	19911690	-0.0136048	0.00202516	1.80011e-11	A	G	0.57621	45.13
	rs8102873	19	57488423	0.0123302	0.00201474	9.40005e-10	T	C	0.584919	37.4543
	rs80276949	10	52373245	0.0457563	0.00669008	8.00018e-12	A	G	0.022677	46.7777
	rs7947951	11	13356030	0.0193777	0.00214074	1.39991e-19	G	A	0.689254	81.9363
	rs79357714	11	116902639	-0.0289463	0.00476453	1.2e-09	G	A	0.045724	36.9102
	rs79287178	3	172294500	0.0500946	0.00600435	7.19946e-17	A	G	0.031151	69.6065
	rs79153732	8	19662937	0.0773626	0.00758596	1.99986e-24	T	C	0.017389	104.002
	rs7861679	9	123375589	0.0122025	0.00216741	1.79999e-08	T	C	0.696815	31.6968
	rs78588343	6	7249460	-0.0155231	0.0026035	2.5e-09	A	G	0.176216	35.5502
	rs78484485	11	116598065	-0.0758529	0.00439863	1.20005e-66	A	G	0.054016	297.378
	rs7847285	9	13723175	-0.0116104	0.00202626	1e-08	C	T	0.589213	32.8325
	rs78058190	2	219699999	0.0816071	0.00510649	1.69981e-57	A	G	0.05045	255.394
	rs7786339	7	72139093	0.016328	0.00265352	7.59994e-10	T	C	0.168936	37.8635
	rs7714361	5	112490629	0.0138858	0.00236622	4.39997e-09	C	A	0.233667	34.4375
	rs7704653	5	90255685	0.0157533	0.00224582	2.29985e-12	G	A	0.723029	49.2032
	rs77009508	6	161004972	0.0450912	0.00379997	1.80011e-32	G	A	0.073734	140.807
	rs75609851	8	19871080	-0.199116	0.0100401	1.59993e-87	A	G	0.01048	393.311
	rs75268115	11	18301915	-0.0207435	0.0035798	6.80002e-09	G	A	0.084699	33.5774
	rs7424120	2	59313974	-0.0123561	0.00203065	1.2e-09	T	C	0.601724	37.0248
	rs742036	16	960725	-0.0143632	0.00205112	2.49977e-12	A	G	0.375259	49.0366
	rs74090351	1	61705898	-0.0250097	0.00393658	2.1e-10	A	G	0.068143	40.3626
	rs7400002	13	114524944	0.0139701	0.00236663	3.59998e-09	G	A	0.230609	34.8448
	rs7308584	12	6706744	0.0149992	0.00256911	5.30005e-09	A	G	0.184436	34.0856
	rs73025562	6	160562481	0.0138633	0.00231292	2e-09	A	G	0.245879	35.9263
	rs729761	6	43804571	0.0177868	0.00221435	9.49948e-16	G	T	0.711859	64.5213
	rs72801474	5	132444128	-0.0307938	0.00344154	3.59998e-19	A	G	0.091843	80.061
	rs72784786	2	28489549	0.0263468	0.00416714	2.59998e-10	A	G	0.060638	39.9742
	rs7274718	20	56113783	0.0159491	0.00202919	3.80014e-15	A	G	0.598516	61.777
	rs72644085	5	55783832	-0.0196036	0.00281241	3.19963e-12	C	T	0.146036	48.5864
	rs72555385	7	73123473	0.0653776	0.0046178	1.69981e-45	G	A	0.048975	200.442
	rs7244	5	153800513	0.0151978	0.00261808	6.4e-09	A	G	0.174166	33.6973
	rs7239575	18	21120035	-0.0160767	0.00199133	6.79986e-16	C	T	0.490494	65.1789
	rs7215055	17	17458353	0.0389233	0.00410062	2.29985e-21	G	A	0.062892	90.0991
	rs71603401	4	18034463	0.0264991	0.00291753	1.10002e-19	G	A	0.136804	82.4958
	rs7140110	13	114544024	0.0283172	0.00217811	1.20005e-38	C	T	0.298338	169.021
	rs71368855	19	56087586	0.026073	0.00312826	7.8001e-17	T	C	0.115087	69.4666
	rs7135509	12	22765676	-0.0121338	0.00221197	4.09996e-08	C	T	0.293196	30.0909
	rs7134375	12	20473758	-0.0171435	0.00200504	1.20005e-17	A	C	0.431174	73.106
	rs7077812	10	81096071	0.0142284	0.00250611	1.40001e-08	C	T	0.194911	32.2338
	rs6999569	8	126475770	-0.0860885	0.00198061	1e-200	G	A	0.470737	1889.26
	rs698927	1	93836218	-0.0183059	0.00256302	9.20026e-13	C	A	0.183785	51.0127
	rs696825	9	86583076	-0.0202838	0.00228763	7.50067e-19	T	C	0.252926	78.6189
	rs6882076	5	156390297	0.0331011	0.00206122	4.90004e-58	C	T	0.634285	257.891
	rs684773	3	135956305	0.0291133	0.00234718	2.49977e-35	C	A	0.766797	153.847
	rs6805924	3	69879670	0.0109684	0.00200571	4.49997e-08	T	G	0.430548	29.9054
	rs67981690	12	21343886	0.0299225	0.00297454	8.30042e-24	G	A	0.129887	101.194
	rs6792725	3	24520283	-0.0152543	0.00221886	6.20012e-12	G	A	0.692404	47.2634
	rs676210	2	21231524	-0.0735169	0.00244968	7.09578e-198	A	G	0.205293	900.649
	rs6572807	14	52480621	0.0124759	0.00224899	2.90001e-08	G	A	0.267065	30.7729
	rs6562773	13	74188935	-0.0120538	0.00201057	2e-09	G	A	0.547533	35.9426
	rs6532798	4	100054827	0.013792	0.00216353	1.79999e-10	T	C	0.697405	40.6377
	rs6517522	21	40553845	-0.0129031	0.00199242	9.3994e-11	C	T	0.498138	41.9398
	rs6506033	18	289209	-0.0228948	0.00383903	2.5e-09	T	C	0.072523	35.5656
	rs6432622	2	161340270	-0.0108868	0.00198007	3.79997e-08	G	A	0.490264	30.2301
	rs62473520	7	130583442	-0.0211003	0.00380118	2.80001e-08	C	T	0.077998	30.8135
	rs62427982	6	107437166	-0.0133153	0.00213196	4.20001e-10	T	C	0.32217	39.0071
	rs62274099	3	156810578	0.0120882	0.00202424	2.30001e-09	T	C	0.424205	35.6615
	rs62135012	2	50731010	-0.0117482	0.00207507	1.5e-08	A	G	0.357929	32.0536
	rs62128802	19	48341814	-0.0158746	0.00257782	7.39997e-10	T	C	0.183216	37.9228
	rs62117489	19	8442202	-0.0427743	0.00431389	3.59998e-23	A	C	0.056432	98.3168
	rs61993685	14	100765823	-0.0234087	0.00373997	3.89996e-10	C	T	0.076413	39.1758
	rs61905078	11	116596309	0.199898	0.00379494	1e-200	C	A	0.073841	2774.64
	rs61830291	1	221001142	0.0287484	0.00337913	1.80011e-17	C	A	0.095791	72.3798
	rs61729990	11	117052532	-0.0558488	0.00752135	1.10002e-13	A	C	0.017888	55.1361
	rs60856912	17	65892343	0.0248329	0.00270829	4.79954e-20	T	G	0.162906	84.0745
	rs6073958	20	44551855	0.0556952	0.00249344	1.59956e-110	C	T	0.198674	498.928
	rs6028716	20	38547459	-0.0128217	0.00228302	2e-08	A	G	0.258428	31.5407
	rs58542926	19	19379549	-0.103184	0.00378074	5.29663e-164	T	C	0.074608	744.854
	rs56397607	10	114042643	0.0174851	0.00257608	1.10002e-11	G	A	0.182538	46.0699
	rs55646464	5	173324971	0.0121913	0.00217016	1.89998e-08	T	G	0.300087	31.5585
	rs499293	11	30504660	-0.0117912	0.00208902	1.7e-08	A	G	0.65807	31.8589
	rs4976033	5	67714246	0.0177909	0.00205178	4.30031e-18	G	A	0.402122	75.1855
	rs4969179	17	76391454	-0.0177529	0.00203649	2.80027e-18	G	T	0.60445	75.9931
	rs4841580	8	11517977	-0.0245383	0.00200093	1.39991e-34	C	T	0.434941	150.392
	rs483808	19	7957481	-0.0136636	0.00218517	4e-10	T	C	0.701973	39.0985
	rs483082	19	45416178	0.0862119	0.00234474	1e-200	T	G	0.23535	1351.9
	rs480823	11	116525730	0.15572	0.00371974	1e-200	C	T	0.078996	1752.52
	rs4765148	12	124478637	-0.0251537	0.0021456	9.70063e-32	T	G	0.312686	137.438
	rs4761234	12	69732105	-0.0140236	0.00199376	1.99986e-12	C	T	0.484365	49.4736
	rs4731701	7	130430930	-0.0325803	0.00198921	2.70023e-60	T	C	0.493088	268.256
	rs4675812	2	242395674	-0.0142305	0.00201176	1.50003e-12	A	G	0.587882	50.0366
	rs4665972	2	27598097	-0.10025	0.00203577	1e-200	C	T	0.604587	2425
	rs4471666	16	85198965	-0.022461	0.00396699	1.5e-08	G	T	0.069488	32.058
	rs4253750	22	46613852	0.0177576	0.00243701	3.19963e-13	C	T	0.214455	53.095
	rs41785	7	116486020	-0.0150445	0.00201492	8.19974e-14	A	C	0.417487	55.7494
	rs4134963	6	20486798	-0.0189544	0.00254235	8.99912e-14	T	C	0.189878	55.5839
	rs4128205	2	165467068	0.0115011	0.00199472	8.10009e-09	C	A	0.509173	33.2441
	rs3974807	11	49161967	0.0159776	0.00253125	2.80001e-10	T	C	0.189267	39.8431
	rs394872	21	46582100	0.0111807	0.00200285	2.39999e-08	T	C	0.536237	31.1631
	rs3860846	8	126631687	0.0297027	0.00224011	4.00037e-40	T	C	0.27531	175.814
	rs3820897	2	3642361	0.0197269	0.00260304	3.50026e-14	C	T	0.819861	57.4323
	rs3814883	16	29994922	0.0148926	0.00199657	8.69961e-14	T	C	0.482498	55.6381
	rs3808477	8	116670347	-0.0133854	0.00220342	1.2e-09	T	C	0.279294	36.9035
	rs3775228	4	87985166	0.0338197	0.00203602	5.79963e-62	T	C	0.399717	275.915
	rs3758413	10	17268839	0.0111232	0.00201767	3.50002e-08	C	T	0.417724	30.392
	rs3731696	2	203431804	0.0218939	0.00303176	5.10035e-13	G	A	0.121188	52.1503
	rs36043408	1	203511492	-0.0128072	0.00198554	1.09999e-10	A	G	0.502153	41.6055
	rs35763453	12	46215895	0.02845	0.00435137	6.20012e-11	C	T	0.058647	42.7477
	rs34682685	16	72096227	0.0337428	0.00326987	5.79963e-25	A	G	0.104198	106.488
	rs34389637	3	12132016	0.025209	0.0040263	3.79997e-10	C	CT	0.934514	39.2012
	rs343	8	19810787	-0.141493	0.00361052	1e-200	A	C	0.083129	1535.78
	rs326222	11	47259668	0.0252203	0.00215698	1.39991e-31	C	T	0.697957	136.713
	rs325485	5	103995368	-0.0117435	0.00204042	8.60003e-09	G	A	0.602889	33.125
	rs320369	1	118143517	-0.0125327	0.00214567	5.19996e-09	G	A	0.683292	34.1164
	rs3103310	3	12473045	0.0202549	0.00236652	1.10002e-17	G	A	0.241785	73.2554
	rs308	8	19817476	-0.159413	0.00698442	2.60016e-115	G	T	0.020597	520.939
	rs2983896	6	97029871	0.0137912	0.00242177	1.2e-08	A	G	0.21474	32.4294
	rs2943645	2	227099180	0.0402918	0.00207151	2.90001e-84	T	C	0.646594	378.32
	rs2937124	16	69862109	-0.0182561	0.00212336	8.10028e-18	T	C	0.362769	73.9212
	rs2925979	16	81534790	-0.0322092	0.00217095	8.49963e-50	C	T	0.699976	220.12
	rs28577186	16	4488191	-0.0163428	0.00211672	1.20005e-14	A	G	0.664571	59.611
	rs28383314	6	32587213	0.0379005	0.00204671	1.50003e-76	C	T	0.624109	342.908
	rs278981	4	40428010	0.0125871	0.00229058	3.89996e-08	C	T	0.758155	30.1968
	rs2773469	10	115798895	-0.0188717	0.00225426	5.70033e-17	G	A	0.733286	70.0832
	rs275184	15	39444679	-0.0173487	0.00275263	2.90001e-10	G	T	0.162051	39.7226
	rs2699805	7	26394297	-0.0201313	0.00203748	5.10035e-23	A	G	0.399672	97.6241
	rs2487294	10	113937941	0.0183191	0.00222084	1.59993e-16	T	G	0.723477	68.0415
	rs2407278	8	37399290	-0.0339449	0.00581961	5.39995e-09	G	A	0.030154	34.0221
	rs2382825	2	219184275	-0.0134774	0.00204919	4.79954e-11	T	C	0.622954	43.2561
	rs2305746	19	35556300	0.0282544	0.0039744	1.20005e-12	G	A	0.933319	50.5393
	rs2304969	17	4692559	-0.0161469	0.0028501	1.5e-08	T	G	0.144932	32.0965
	rs2302263	11	64021821	0.0436112	0.00349051	8.00018e-36	T	C	0.088863	156.106
	rs2267373	22	38600542	0.0215638	0.00202145	1.39991e-26	T	C	0.580693	113.795
	rs2244278	9	107661129	-0.0269912	0.00306133	1.20005e-18	A	C	0.120553	77.7363
	rs2240533	14	71541026	-0.0129897	0.00215234	1.6e-09	C	T	0.309898	36.4231
	rs2240466	7	72856269	-0.122769	0.00301848	1e-200	A	G	0.122916	1654.25
	rs2237029	4	55535336	-0.0139399	0.00204019	8.30042e-12	A	G	0.601353	46.6851
	rs2187114	18	70517838	-0.0185151	0.00330375	2.1e-08	A	G	0.101024	31.4078
	rs2137557	3	188439236	0.0117624	0.00208003	1.6e-08	C	T	0.645612	31.9781
	rs213494	1	54877103	0.0156106	0.00207578	5.50047e-14	T	C	0.648345	56.5557
	rs2131919	9	95283887	0.0173511	0.00268396	1e-10	G	A	0.164266	41.7928
	rs2131311	1	40435999	-0.0124181	0.00222753	2.5e-08	G	A	0.714636	31.0787
	rs2092203	20	39858545	0.0136756	0.00199323	6.79986e-12	T	C	0.481154	47.0737
	rs2081687	8	59388565	-0.0261379	0.00209126	7.59976e-36	C	T	0.663201	156.216
	rs2070341	14	24545375	0.0113012	0.00203413	2.80001e-08	T	C	0.60309	30.8668
	rs2068888	10	94839642	-0.0318216	0.00199589	3.19963e-57	A	G	0.450732	254.197
	rs2043085	15	58680954	-0.0308028	0.00204157	1.9002e-51	C	T	0.612184	227.642
	rs1938566	1	98478981	-0.0212127	0.00267054	1.99986e-15	T	C	0.834537	63.0948
	rs193735	5	130672958	0.0329807	0.00529922	4.90004e-10	A	G	0.036665	38.7343
	rs188247550	19	19396616	-0.134286	0.00913128	5.90065e-49	T	C	0.013117	216.271
	rs186696265	6	161111700	-0.104318	0.00828522	2.39994e-36	T	C	0.014693	158.53
	rs1835346	6	161162290	-0.0391877	0.00654659	2.19999e-09	G	A	0.023874	35.8319
	rs1801689	17	64210580	-0.06613	0.00577722	2.39994e-30	C	A	0.030543	131.027
	rs1799831	7	44199142	0.024506	0.00273953	3.69999e-19	T	C	0.156029	80.0189
	rs1760801	1	154259650	-0.0202981	0.00218442	1.50003e-20	A	G	0.295768	86.3453
	rs17585887	6	139835498	-0.0285849	0.00201656	1.29987e-45	C	T	0.591074	200.933
	rs174566	11	61592362	0.0485019	0.00207982	2.79898e-120	G	A	0.34974	543.834
	rs17326656	2	48962291	0.0174394	0.00233365	7.8001e-14	T	G	0.238472	55.8459
	rs17184382	15	63792486	-0.0219251	0.00201039	1.10002e-27	C	A	0.425367	118.939
	rs1544980	8	10677981	0.0238704	0.00248513	7.59976e-22	C	T	0.198644	92.2616
	rs151235402	20	569164	0.0521833	0.00815144	1.5e-10	T	C	0.015827	40.9821
	rs150564454	8	19972140	-0.101751	0.00963178	4.40048e-26	A	G	0.011556	111.6
	rs150555490	11	116697081	-0.0384234	0.00427544	2.49977e-19	T	C	0.056868	80.7663
	rs150460588	15	57023457	0.0326952	0.00484966	1.59993e-11	C	T	0.044425	45.4512
	rs150423652	11	116603816	0.285824	0.0122924	1.39959e-119	T	G	0.006675	540.66
	rs150419156	2	27744937	-0.0505491	0.00847063	2.39999e-09	A	G	0.015259	35.6119
	rs149142833	20	32188142	0.0169358	0.00276509	9.09997e-10	T	C	0.156359	37.514
	rs148827772	4	110766064	0.0465516	0.00710636	5.70033e-11	G	A	0.022544	42.9116
	rs1473886	2	20368519	-0.0181218	0.00198519	6.90081e-20	T	G	0.477624	83.3294
	rs145947882	17	41809207	0.137333	0.0063668	3.39625e-103	C	A	0.025952	465.273
	rs143076454	16	921179	0.0403999	0.00735364	3.89996e-08	A	G	0.018647	30.1825
	rs1420384	2	171583876	-0.01279	0.00210534	1.2e-09	T	G	0.66699	36.906
	rs140107293	10	5267191	-0.0227003	0.00275296	1.59993e-16	G	A	0.154707	67.9929
	rs139974673	15	44027885	0.143073	0.00623867	2.19786e-116	C	T	0.026131	525.934
	rs138191773	6	72522321	-0.0471717	0.00791884	2.59998e-09	A	G	0.017021	35.4846
	rs1347188	4	124743259	0.0139021	0.00231385	1.89998e-09	G	A	0.245797	36.0986
	rs134551	22	28807625	-0.0116536	0.00211111	3.40001e-08	T	C	0.335438	30.4718
	rs1340819	13	29145323	-0.0121655	0.00209472	6.29999e-09	C	A	0.345011	33.7293
	rs13389219	2	165528876	-0.0376242	0.00202704	6.59933e-77	T	C	0.392551	344.516
	rs13354321	5	157925297	-0.0154305	0.00201429	1.9002e-14	C	T	0.409787	58.6835
	rs13269725	8	72459889	0.0349878	0.0036804	1.99986e-21	G	A	0.078416	90.3739
	rs13118477	4	89704367	0.0149897	0.00203847	1.9002e-13	A	G	0.392654	54.0726
	rs13108218	4	3443931	-0.0305169	0.00205811	9.70063e-50	G	A	0.614859	219.859
	rs13107325	4	103188709	0.0300749	0.00377743	1.69981e-15	T	C	0.074905	63.3892
	rs13066793	3	87037543	-0.0224583	0.00347278	1e-10	G	A	0.090095	41.8215
	rs12948505	17	464962	0.0138887	0.00251214	3.2e-08	T	C	0.194119	30.5658
	rs12928099	16	15150505	-0.0282116	0.00218133	2.90001e-38	A	C	0.296442	167.268
	rs12926107	16	88004092	0.0126364	0.0020014	2.69998e-10	G	A	0.454903	39.8638
	rs12902047	15	41915522	-0.0129253	0.00214533	1.7e-09	C	A	0.313907	36.2989
	rs12880341	14	64236191	0.0209696	0.00273647	1.80011e-14	C	T	0.159023	58.7217
	rs12669911	7	32262377	-0.0118536	0.00205405	7.90005e-09	C	A	0.614026	33.3026
	rs12530679	7	106632113	-0.0121299	0.00201682	1.79999e-09	G	A	0.48466	36.1726
	rs12504746	4	39646631	-0.0152674	0.00252148	1.40001e-09	T	C	0.192857	36.6622
	rs12475332	2	227232047	-0.0140007	0.00225386	5.19996e-10	G	T	0.260988	38.5874
	rs12446515	16	56987015	-0.0334207	0.00213589	3.50026e-55	T	C	0.322889	244.835
	rs12424054	12	107186747	0.0191212	0.00235346	4.49987e-16	A	G	0.232437	66.0111
	rs12185242	17	47407071	0.0175265	0.00199898	1.80011e-18	C	A	0.454836	76.8729
	rs11904650	2	119745127	0.0410641	0.00692419	2.99999e-09	G	A	0.020999	35.1712
	rs11746801	5	55990342	-0.0123657	0.00207937	2.69998e-09	A	G	0.637069	35.365
	rs117431393	17	42355095	0.0312254	0.00537977	6.49995e-09	G	A	0.035446	33.689
	rs117316645	19	45458212	0.0277821	0.00495454	2.1e-08	A	G	0.0421	31.443
	rs117291242	11	380315	0.0297851	0.00528225	1.7e-08	T	C	0.036536	31.7951
	rs117287238	11	15090794	-0.0394324	0.00614684	1.40001e-10	A	G	0.028185	41.1531
	rs117233107	12	4328521	-0.0732317	0.0086122	1.80011e-17	A	G	0.015176	72.3053
	rs116843064	19	8429323	-0.226505	0.00721009	1e-200	A	G	0.019327	986.902
	rs11637681	15	40387971	0.0125866	0.00224251	2e-08	G	A	0.276291	31.5027
	rs11600815	11	14797227	-0.0322469	0.00458644	2.09991e-12	A	G	0.051753	49.4339
	rs11429307	5	55857025	-0.0465382	0.00253471	2.70023e-75	G	GT	0.80902	337.103
	rs1133400	10	134459388	0.0137462	0.00239759	9.80009e-09	G	A	0.219923	32.8712
	rs11240358	1	205070573	0.0135651	0.00202953	2.29985e-11	A	G	0.394026	44.674
	rs112108602	1	51149820	0.0268214	0.00346931	1.10002e-14	A	AG	0.909696	59.7691
	rs11206374	1	40048009	0.0250232	0.00237577	6.09958e-26	A	G	0.224815	110.937
	rs11187019	10	94248310	-0.0116437	0.00200546	6.4e-09	G	A	0.550621	33.7096
	rs11122450	1	230301811	-0.0481745	0.0020373	1.30017e-123	G	T	0.611733	559.145
	rs11100083	4	157682598	-0.0160248	0.00237585	1.50003e-11	C	T	0.226214	45.4933
	rs11078597	17	1618363	0.0191708	0.0025513	5.70033e-14	C	T	0.186613	56.4622
	rs11030107	11	27694835	0.0160418	0.00225693	1.20005e-12	G	A	0.260757	50.5208
	rs11000468	10	74711376	-0.0148544	0.00231748	1.5e-10	T	C	0.255269	41.0845
	rs10899490	11	78105879	-0.0170082	0.00269347	2.69998e-10	T	C	0.161369	39.8742
	rs10883026	10	99793865	-0.0144604	0.00200472	5.50047e-13	T	C	0.521569	52.0299
	rs10811662	9	22134253	-0.0154098	0.0026291	4.60002e-09	A	G	0.173212	34.3542
	rs10797119	9	92202495	0.0157113	0.00200465	4.60045e-15	C	T	0.536622	61.4253
	rs1077835	15	58723426	0.0473668	0.00240452	2.19989e-86	G	A	0.220459	388.053
	rs10775406	17	46197755	0.0206571	0.00232578	6.59933e-19	G	A	0.759694	78.8863
	rs10773049	12	124506631	-0.0290398	0.00203691	4.10015e-46	C	T	0.39535	203.256
	rs10773000	12	123736084	-0.0149294	0.0021148	1.69981e-12	T	G	0.332276	49.8363
	rs10750766	11	65473798	0.0193855	0.00218742	7.8001e-19	A	C	0.709959	78.5398
	rs10642257	7	25992323	0.0370518	0.00271209	1.69981e-42	A	AAGGCC	0.839273	186.642
	rs10513688	3	170727218	0.0247828	0.00334924	1.39991e-13	A	G	0.097403	54.753
	rs1045241	5	118729286	-0.0206988	0.00224699	3.19963e-20	T	C	0.270943	84.8571
	rs1043897	1	230416399	-0.014664	0.00201517	3.40017e-13	T	G	0.415585	52.9519
	rs10405944	19	33728001	-0.013209	0.00201995	6.20012e-11	C	T	0.483077	42.7621
	rs1037117	15	102068658	0.0172213	0.00229153	5.70033e-14	A	G	0.254798	56.4782
	rs10277582	7	17284989	-0.0173714	0.00308015	1.7e-08	T	C	0.118591	31.8072
	rs10242866	7	17920613	0.015793	0.00202877	7.00003e-15	T	C	0.398698	60.5987
	rs10210970	2	28646847	0.0232557	0.00292788	1.99986e-15	T	C	0.131448	63.0888
	rs10152471	15	101890913	-0.0135209	0.00204778	4.00037e-11	A	G	0.388656	43.5958
	rs1009360	2	65276049	-0.0184832	0.00200785	3.40017e-20	C	T	0.41859	84.7407
apoA-I	rs9989419	16	56985139	0.114993	0.00199407	1e-200	G	A	0.60551	3325.54
	rs9987289	8	9183358	0.0852351	0.00339983	1e-138	G	A	0.908733	628.525
	rs9977268	21	46907287	-0.0182291	0.00246656	1.50003e-13	T	C	0.19875	54.6194
	rs9817452	3	156795414	0.0174889	0.00202187	5.19996e-18	T	G	0.387699	74.8201
	rs976002	4	69343287	0.0230909	0.00228117	4.40048e-24	G	A	0.24529	102.463
	rs9608972	22	30931307	-0.0174956	0.00230014	2.80027e-14	C	T	0.241455	57.8561
	rs9604045	13	113927208	0.0154221	0.00235515	5.79963e-11	T	G	0.253532	42.8795
	rs9471972	6	42915021	0.0268788	0.00196789	1.80011e-42	A	G	0.53516	186.56
	rs9426827	1	154589965	0.0170728	0.00195828	2.80027e-18	C	T	0.478096	76.0081
	rs9347737	6	163740322	-0.0111198	0.00200525	2.90001e-08	G	A	0.428349	30.7508
	rs921919	12	125265201	-0.0371454	0.00212658	2.49977e-68	A	G	0.669251	305.103
	rs8098618	18	21069269	0.0115362	0.00197395	5.1e-09	T	C	0.479414	34.1549
	rs8028785	15	43130646	0.0146329	0.00253358	7.69999e-09	C	T	0.18254	33.3574
	rs80236739	15	58972699	-0.0322411	0.00450448	8.19974e-13	G	A	0.049836	51.2307
	rs79984435	16	56834234	-0.0855866	0.00337218	4.19759e-142	A	G	0.092203	644.155
	rs7952521	11	116385354	0.0270189	0.00330241	2.80027e-16	A	G	0.105535	66.9381
	rs79506257	13	103553567	0.0282603	0.00464917	1.2e-09	A	G	0.047786	36.949
	rs78965095	18	46617871	0.0436944	0.00696137	3.50002e-10	T	C	0.02028	39.3969
	rs78807370	6	43761091	0.0159362	0.00276835	8.60003e-09	A	G	0.14785	33.1381
	rs78296522	11	116648776	0.0682915	0.00475519	8.99912e-47	A	C	0.045117	206.252
	rs7817574	8	144302570	0.0362105	0.002519	7.39946e-47	C	T	0.184902	206.639
	rs78058190	2	219699999	-0.0662337	0.00504914	2.60016e-39	A	G	0.050441	172.077
	rs77960347	18	47109955	0.335992	0.00855615	1e-200	G	A	0.01329	1542.06
	rs7700617	5	39546706	-0.0127352	0.00196898	9.8992e-11	A	C	0.497345	41.834
	rs76962725	1	224427133	-0.0297678	0.00523466	1.29999e-08	A	G	0.037263	32.3383
	rs76456334	7	25827967	-0.0367073	0.0051179	7.39946e-13	C	T	0.039627	51.4424
	rs76428106	13	28604007	-0.0611895	0.00904242	1.29987e-11	C	T	0.012974	45.7915
	rs76213248	19	11269893	0.021302	0.00200107	1.80011e-26	T	C	0.410374	113.323
	rs75406471	10	5257647	-0.0246389	0.00272053	1.29987e-19	A	G	0.154253	82.023
	rs75152587	16	56579961	-0.0797507	0.00879219	1.20005e-19	T	G	0.012759	82.2763
	rs75104038	6	34190104	-0.0391467	0.00409914	1.29987e-21	A	G	0.06109	91.2021
	rs7503353	17	8107979	-0.0135158	0.00197236	7.29962e-12	T	G	0.532015	46.9582
	rs74500135	9	106603816	0.073606	0.0103329	1.10002e-12	C	T	0.009827	50.7437
	rs74025321	16	68878721	-0.0298646	0.00372792	1.10002e-15	G	A	0.074272	64.1771
	rs737338	19	11347657	-0.10808	0.00533159	2.29985e-91	T	C	0.035108	410.939
	rs73216701	3	108865293	0.0164708	0.00198166	9.3994e-17	G	A	0.429931	69.083
	rs7305678	12	7681181	-0.0219163	0.00291351	5.40008e-14	G	T	0.866252	56.585
	rs73052033	3	185828465	-0.0184412	0.00253065	3.19963e-13	C	T	0.185091	53.1024
	rs7304603	12	71114400	-0.0127358	0.00197331	1.09999e-10	C	T	0.537686	41.6545
	rs72959041	6	127454893	-0.0360896	0.00459848	4.19952e-15	A	G	0.049126	61.5936
	rs72926946	2	203477868	-0.0154139	0.00214215	6.20012e-13	A	C	0.296458	51.7756
	rs72761606	1	243740445	-0.0161075	0.0029005	2.80001e-08	C	T	0.131378	30.8397
	rs72729623	4	154208278	-0.0153324	0.0028013	4.39997e-08	T	C	0.143413	29.9572
	rs7251640	19	18614935	0.0151586	0.00249926	1.29999e-09	C	T	0.194006	36.7871
	rs7238484	18	57735552	-0.0213669	0.00221605	5.30029e-22	T	G	0.268307	92.966
	rs7216643	17	66827491	-0.0223626	0.00236278	2.90001e-21	T	C	0.223559	89.5773
	rs7170463	15	41888918	0.0161797	0.00211746	2.19989e-14	G	A	0.311339	58.3862
	rs7147511	14	100794818	-0.0146441	0.00198342	1.50003e-13	T	C	0.495499	54.5125
	rs7136506	12	125326153	-0.0318107	0.00242195	2.09991e-39	C	T	0.216465	172.511
	rs7036107	9	92177897	-0.0112609	0.00200049	1.79999e-08	G	A	0.511088	31.6864
	rs7032795	9	117134945	0.0145998	0.00197016	1.29987e-13	C	T	0.493507	54.915
	rs698927	1	93836218	0.0245539	0.00252916	2.80027e-22	C	A	0.183778	94.2515
	rs6977416	7	150542711	-0.0157606	0.00209756	5.70033e-14	A	G	0.334458	56.4569
	rs686030	9	15304782	0.056386	0.00281822	4.70002e-89	A	C	0.858646	400.307
	rs681869	18	2981398	-0.0165331	0.00215035	1.50003e-14	T	C	0.704152	59.114
	rs6807935	3	141114293	-0.0126887	0.00206633	8.19993e-10	G	A	0.343276	37.7081
	rs6772763	3	15702641	0.0128955	0.00198642	8.49963e-11	C	T	0.565136	42.1439
	rs6765484	3	50041313	0.0204373	0.00196501	2.49977e-25	T	C	0.472703	108.173
	rs676210	2	21231524	0.0600946	0.00242305	8.70964e-136	A	G	0.205092	615.101
	rs6705285	2	66709468	0.0111578	0.00197677	1.7e-08	T	G	0.609051	31.8599
	rs6557267	6	153433701	-0.0118925	0.00200039	2.80001e-09	T	C	0.403524	35.3441
	rs6505176	17	28661769	-0.0174387	0.00209523	8.60003e-17	G	T	0.331623	69.2731
	rs6469605	8	116601894	0.0349728	0.00198158	1e-69	T	C	0.568386	311.485
	rs6448429	4	26066863	-0.0222015	0.0026563	6.4003e-17	T	C	0.166112	69.8571
	rs62405458	5	180225919	-0.0147906	0.00254902	6.49995e-09	T	C	0.18267	33.6686
	rs62369502	5	43815578	-0.0214152	0.00369565	6.80002e-09	C	T	0.076477	33.5786
	rs6224	15	91423543	0.0125532	0.0019683	1.79999e-10	T	G	0.473585	40.6749
	rs62135193	2	48755477	-0.0108289	0.00197527	4.20001e-08	T	C	0.541376	30.0549
	rs61980899	14	81676844	-0.0139977	0.00197925	1.50003e-12	C	T	0.537847	50.0164
	rs61805076	1	182154990	-0.015348	0.00207699	1.50003e-13	C	T	0.333426	54.6053
	rs61596977	8	95997165	-0.0155338	0.00282539	3.79997e-08	T	C	0.140376	30.2272
	rs613808	11	116710968	-0.0849696	0.00218306	1e-200	G	A	0.715399	1514.94
	rs61352607	12	57839173	0.0277155	0.00229129	1.10002e-33	T	G	0.240776	146.314
	rs59104589	2	242237902	0.0170163	0.00204114	7.59976e-17	T	C	0.358199	69.5
	rs58473820	11	122514403	0.0207534	0.00202552	1.20005e-24	T	C	0.377992	104.98
	rs57274629	1	66110292	0.0150043	0.0020611	3.29989e-13	G	A	0.35757	52.9948
	rs55812947	7	44790807	-0.0160846	0.00292874	4e-08	C	T	0.129001	30.1619
	rs55801554	5	158622532	0.0137251	0.00227815	1.7e-09	A	C	0.247289	36.2966
	rs557933	1	234853268	0.0190421	0.00196414	3.19963e-22	C	A	0.520257	93.9907
	rs55710224	7	100698648	0.0121553	0.00196433	6.1e-10	A	G	0.498535	38.2915
	rs49675	8	9151688	0.0212458	0.00330763	1.29999e-10	A	G	0.09805	41.2584
	rs4930352	11	66066993	0.0167274	0.00199616	5.30029e-17	T	G	0.494116	70.2209
	rs4883201	12	9082581	-0.025331	0.00323925	5.30029e-15	G	A	0.102363	61.1527
	rs4875043	8	144496772	-0.0151546	0.00240369	2.90001e-10	C	A	0.216842	39.7495
	rs4795386	17	37746847	0.0255755	0.00220821	5.10035e-31	G	A	0.723594	134.143
	rs4762756	12	20597577	0.0140023	0.00224718	4.60002e-10	C	T	0.73563	38.826
	rs472629	1	20917108	-0.0182717	0.0020755	1.29987e-18	A	G	0.333138	77.5019
	rs4676609	3	39214256	0.0149357	0.00247368	1.6e-09	T	C	0.196448	36.4556
	rs4660586	1	42407229	0.0125868	0.00223611	1.79999e-08	T	C	0.73925	31.6843
	rs4632228	18	19641009	-0.01986	0.00240757	1.59993e-16	T	G	0.209496	68.0457
	rs4441609	3	36892717	0.0110807	0.00202443	4.39997e-08	C	T	0.625576	29.9591
	rs4330777	16	57235644	-0.0165422	0.00195706	2.80027e-17	A	G	0.475043	71.4461
	rs429358	19	45411941	-0.102539	0.00271512	1e-200	C	T	0.154478	1426.26
	rs41272086	6	161008646	-0.037348	0.00319457	1.39991e-31	A	G	0.105579	136.682
	rs4052908	6	139842576	0.0154632	0.00205027	4.60045e-14	AATT	A	0.635826	56.8822
	rs3828960	7	135194613	-0.0146086	0.00242641	1.7e-09	G	A	0.206522	36.2484
	rs3818716	17	16851834	-0.0127148	0.00204635	5.19996e-10	T	C	0.364549	38.6064
	rs3798233	6	116317092	0.0179824	0.00199898	2.29985e-19	C	A	0.402016	80.9242
	rs3768321	1	40035928	-0.0422764	0.00246498	6.20012e-66	T	G	0.196773	294.15
	rs3749748	5	127350549	0.0220635	0.00228295	4.30031e-22	T	C	0.247259	93.402
	rs3747973	1	205677148	0.0148472	0.00199494	9.8992e-14	G	A	0.592553	55.3898
	rs3740688	11	47380340	0.0156042	0.00197254	2.60016e-15	T	G	0.544632	62.5794
	rs3732356	3	119529113	-0.0367324	0.00398002	2.70023e-20	T	G	0.93378	85.1781
	rs367070	19	54800500	0.0390583	0.00235452	8.4004e-62	G	A	0.225382	275.183
	rs36096231	8	72399623	-0.0207809	0.0037859	4e-08	T	C	0.072481	30.1294
	rs36024006	8	121887377	-0.0178019	0.00196944	1.59993e-19	A	G	0.451989	81.7047
	rs35909200	16	72156666	0.0189094	0.00267946	1.69981e-12	G	T	0.157388	49.8036
	rs35745599	7	6451080	0.0284306	0.0022991	4.00037e-35	T	C	0.238631	152.917
	rs35639749	13	103844270	-0.0517323	0.00891628	6.59994e-09	A	AC	0.986849	33.6633
	rs351862	5	176541370	0.0184158	0.00309396	2.59998e-09	T	C	0.114501	35.4284
	rs35135293	2	20363666	-0.0217004	0.00196743	2.70023e-28	T	C	0.518821	121.657
	rs34955778	16	15139594	-0.0124025	0.00197989	3.69999e-10	C	T	0.418701	39.2407
	rs34767118	7	50271064	0.0169225	0.00210261	8.4004e-16	G	A	0.325924	64.7756
	rs34642857	3	123051019	-0.0133464	0.00227583	4.49997e-09	C	T	0.250631	34.3913
	rs34397747	1	27092322	-0.0393293	0.00355947	2.19989e-28	C	T	0.084314	122.085
	rs34180494	15	75370012	-0.0128704	0.00219833	4.79999e-09	C	A	0.273764	34.2766
	rs34138141	17	40781561	-0.0180909	0.00218637	1.29987e-16	T	G	0.280674	68.4657
	rs34045894	10	33967489	-0.0147562	0.00270319	4.79999e-08	A	G	0.156314	29.7986
	rs33042	16	28139077	0.0166688	0.00227684	2.49977e-13	A	G	0.246125	53.5974
	rs326	8	19819439	0.0827185	0.00214788	1e-200	G	A	0.293968	1483.15
	rs2999141	1	23832103	-0.0121341	0.00222468	4.90004e-08	C	A	0.275749	29.7495
	rs2972166	3	12316339	0.0149974	0.00220729	1.10002e-11	A	G	0.274658	46.165
	rs2965169	19	45251156	0.0188372	0.00201158	7.59976e-21	C	A	0.388716	87.6916
	rs2963468	5	158003020	-0.0173619	0.00232896	8.99912e-14	G	A	0.235288	55.5738
	rs2943645	2	227099180	-0.0338732	0.00204772	1.80011e-61	T	C	0.646764	273.635
	rs2925979	16	81534790	0.0285287	0.00212908	6.09958e-41	C	T	0.69987	179.548
	rs28824216	4	92599431	0.0378245	0.00674912	2.1e-08	T	C	0.021793	31.4089
	rs286965	5	153360230	-0.0160285	0.00203382	3.19963e-15	C	T	0.632207	62.1099
	rs28362901	15	74712937	-0.0246353	0.00345669	1e-12	A	C	0.088368	50.7919
	rs2804894	10	33647091	0.0162537	0.00224777	4.79954e-13	A	G	0.734838	52.2878
	rs2740488	9	107661742	-0.0804019	0.00222407	1e-200	C	A	0.265536	1306.88
	rs2726112	7	36178753	-0.0138549	0.00196994	1.99986e-12	G	A	0.453816	49.4653
	rs267738	1	150940625	0.0343761	0.00236534	7.50067e-48	G	T	0.219299	211.216
	rs2642438	1	220970028	0.0291285	0.00213949	3.29989e-42	G	A	0.702624	185.36
	rs254559	5	134444982	-0.0170773	0.0020013	1.39991e-17	A	C	0.40484	72.8139
	rs2544654	5	72888280	0.0128434	0.00217845	3.69999e-09	T	G	0.715237	34.7588
	rs2540951	2	65276736	0.01211	0.00201943	2e-09	G	A	0.376251	35.9609
	rs2520096	9	136919416	0.0140397	0.00221413	2.30001e-10	G	A	0.270128	40.2077
	rs2494747	14	105258437	-0.0322265	0.00202366	4.30031e-57	T	G	0.615762	253.601
	rs2419605	10	113978097	-0.0312837	0.00277987	2.19989e-29	G	A	0.147796	126.645
	rs2395158	6	32374595	-0.0344264	0.00261038	1e-39	G	A	0.16935	173.931
	rs2362541	2	30478453	-0.0112615	0.00195989	9.09997e-09	G	T	0.507575	33.0164
	rs235314	21	46271452	-0.0214751	0.00197484	1.50003e-27	T	C	0.532284	118.251
	rs2305696	16	57157206	-0.018423	0.00195245	3.90032e-21	T	C	0.486258	89.035
	rs2302263	11	64021821	-0.0285016	0.00345206	1.50003e-16	T	C	0.0887	68.1682
	rs2298624	18	47429022	0.0319587	0.00288956	1.99986e-28	T	C	0.132474	122.325
	rs2298214	1	935222	-0.0131486	0.00199824	4.70002e-11	A	C	0.577488	43.2976
	rs2297409	9	107576246	-0.0366326	0.00247546	1.50003e-49	A	G	0.194714	218.99
	rs2294915	22	44340904	-0.0199868	0.00233124	1e-17	T	C	0.231744	73.5043
	rs2281719	1	230297659	0.0534464	0.00201161	1.49968e-155	T	C	0.612469	705.91
	rs2269434	11	47360412	0.0346097	0.00205762	1.69981e-63	C	T	0.345387	282.921
	rs2256720	20	46279531	0.0121751	0.00197748	7.39997e-10	C	T	0.444499	37.9071
	rs2247355	8	103876780	0.0177172	0.00253838	2.99985e-12	T	C	0.182653	48.7166
	rs2245095	10	122857596	-0.025599	0.00344877	1.10002e-13	T	C	0.088862	55.0957
	rs2159935	4	55521017	0.0114396	0.00196234	5.60003e-09	A	G	0.490312	33.9839
	rs2111705	14	75261641	-0.0149276	0.0019717	3.69999e-14	A	G	0.543888	57.319
	rs2071379	17	26695832	-0.0214336	0.00199927	8.10028e-27	G	A	0.595245	114.934
	rs2068888	10	94839642	0.0134211	0.00197105	9.79941e-12	A	G	0.450403	46.364
	rs2066714	9	107586753	0.054303	0.00292716	7.89951e-77	C	T	0.128552	344.156
	rs1970811	10	126696496	-0.0116143	0.00197362	4e-09	C	T	0.457761	34.6305
	rs1919309	11	14029854	0.0116908	0.00196745	2.80001e-09	C	T	0.508795	35.3086
	rs188502504	5	131121165	-0.0291118	0.00525498	2.99999e-08	C	T	0.036433	30.6899
	rs1862205	5	108656635	0.0110691	0.00200091	3.2e-08	A	G	0.404644	30.6034
	rs1852922	3	70936712	0.0123581	0.00212826	6.4e-09	A	G	0.69011	33.7174
	rs1800961	20	43042364	-0.149001	0.00566244	1.30017e-152	T	C	0.031062	692.422
	rs1789896	4	100256984	0.0149273	0.00195991	2.60016e-14	A	G	0.513472	58.0083
	rs17883513	7	94974185	0.029944	0.00538771	2.69998e-08	G	A	0.034361	30.8895
	rs174566	11	61592362	-0.0349039	0.00205457	1e-64	G	A	0.350206	288.606
	rs17326656	2	48962291	-0.0181882	0.00230557	3.10027e-15	T	G	0.238733	62.2333
	rs17008972	3	71756272	0.0192616	0.00298016	1e-10	A	G	0.124198	41.774
	rs1661052	11	2942593	0.0293691	0.00340349	6.20012e-18	A	G	0.908498	74.4616
	rs1601933	15	58671559	-0.0842338	0.00199576	1e-200	T	C	0.466597	1781.38
	rs150844304	15	43726625	-0.0753334	0.00615615	1.99986e-34	C	A	0.025949	149.747
	rs150483923	7	106957161	0.0197365	0.0023555	5.30029e-17	A	C	0.225932	70.206
	rs150237291	18	46781014	0.0494709	0.00674777	2.29985e-13	C	T	0.021812	53.7501
	rs148827772	4	110766064	-0.057089	0.00700743	3.69999e-16	G	A	0.022589	66.3724
	rs145947882	17	41809207	-0.136427	0.00627244	6.9024e-105	C	A	0.026076	473.072
	rs1446585	2	136407479	0.0185954	0.00223649	9.20026e-17	G	A	0.244189	69.1317
	rs144311893	19	45423944	0.122697	0.00690208	1.10002e-70	T	C	0.021987	316.015
	rs144033177	20	571467	-0.0494186	0.0080641	8.9e-10	C	A	0.015828	37.5551
	rs141368429	11	117221862	-0.0569584	0.00458365	1.9002e-35	T	C	0.055929	154.416
	rs1400362	3	185883562	0.0125215	0.00226712	3.29997e-08	C	T	0.741488	30.5045
	rs1395221	4	24626903	-0.0132838	0.00201044	3.90032e-11	T	G	0.397633	43.6579
	rs13379043	14	74250126	0.0217854	0.00222966	1.50003e-22	C	T	0.280373	95.4671
	rs13326165	3	52532118	-0.0195454	0.00242685	8.00018e-16	G	A	0.795376	64.8639
	rs1318175	15	58586129	-0.0780529	0.00268206	3.39625e-186	T	C	0.159965	846.918
	rs13108218	4	3443931	-0.01333	0.00203151	5.30029e-11	G	A	0.614914	43.0549
	rs13107325	4	103188709	-0.071753	0.00372931	1.69981e-82	T	C	0.074994	370.189
	rs13059175	3	152062241	0.0148346	0.00213401	3.59998e-12	T	C	0.299999	48.3235
	rs12943517	17	4083923	-0.0118613	0.00212624	2.39999e-08	A	G	0.310724	31.12
	rs12898210	15	58639710	-0.0491359	0.00300967	6.4003e-60	G	T	0.121583	266.539
	rs12740374	1	109817590	0.0442974	0.00235869	1.10002e-78	T	G	0.220913	352.708
	rs1260326	2	27730940	-0.0258112	0.00200095	4.49987e-38	C	T	0.604673	166.396
	rs12462109	19	52343496	-0.0134097	0.00216974	6.4e-10	T	C	0.287067	38.1964
	rs12436555	14	24634825	-0.0146547	0.00260342	1.79999e-08	A	G	0.173179	31.6859
	rs12273363	11	27744859	-0.0197428	0.00242496	3.90032e-16	C	T	0.205682	66.2839
	rs12229372	12	125339990	0.0296946	0.003302	2.39994e-19	C	T	0.10329	80.8725
	rs11870735	17	481604	-0.0152398	0.00254853	2.19999e-09	T	C	0.180979	35.7585
	rs117853493	8	20056640	0.0567003	0.00803613	1.69981e-12	A	G	0.015074	49.7825
	rs117739035	11	408174	-0.0305721	0.00527087	6.59994e-09	T	G	0.035802	33.6423
	rs117399007	15	59264999	-0.0288859	0.00484793	2.5e-09	T	C	0.043444	35.5025
	rs11691486	2	100796182	0.0141328	0.00230186	8.30004e-10	C	T	0.240048	37.6963
	rs1168124	1	63139730	0.0426112	0.00205353	1.20005e-95	T	C	0.65073	430.572
	rs11641548	16	88039447	-0.0130768	0.00197499	3.59998e-11	C	A	0.43959	43.8403
	rs11632618	15	58724706	0.108049	0.00384587	1.09901e-173	A	G	0.06962	789.319
	rs116006942	5	53405314	-0.0283109	0.00415365	9.3994e-12	A	G	0.060786	46.4566
	rs11481448	20	22146056	0.0114668	0.00197074	5.89997e-09	A	AT	0.497412	33.8552
	rs11429307	5	55857025	0.0223154	0.00250419	5.00035e-19	G	GT	0.808887	79.4099
	rs1132274	20	17596155	-0.0287721	0.0027161	3.19963e-26	A	C	0.154087	112.215
	rs112928559	8	19979846	-0.0367572	0.005252	2.60016e-12	T	C	0.039869	48.9819
	rs11216920	11	118462554	0.0250384	0.00354197	1.59993e-12	G	A	0.084072	49.9716
	rs111849006	14	52581893	0.0146894	0.00260225	1.7e-08	A	G	0.181219	31.8647
	rs11067231	12	109993603	0.021994	0.00196177	3.59998e-29	A	C	0.523895	125.693
	rs11065987	12	112072424	-0.0140735	0.00198803	1.50003e-12	G	A	0.416331	50.1139
	rs11057390	12	124383813	0.0190026	0.00215664	1.20005e-18	G	T	0.295431	77.6374
	rs11045172	12	20470221	0.0222366	0.00247597	2.70023e-19	C	A	0.197912	80.6577
	rs11021232	11	95320808	-0.0164557	0.00256026	1.29999e-10	C	T	0.181005	41.3109
	rs10917383	1	23788994	0.0203915	0.00296088	5.70033e-12	G	A	0.875246	47.4304
	rs10883451	10	101924418	0.022096	0.00196056	1.80011e-29	C	T	0.496282	127.019
	rs10876447	12	53770941	-0.01939	0.00271564	9.30037e-13	A	G	0.154052	50.9813
	rs1086056	3	154088411	-0.0188503	0.00271238	3.69999e-12	G	T	0.844669	48.2987
	rs10798615	1	178513895	-0.0153188	0.00196392	6.20012e-15	G	T	0.533322	60.8418
	rs10774439	12	6731818	0.0164484	0.00255731	1.29999e-10	A	G	0.814838	41.3695
	rs10752898	1	183077896	0.0125396	0.00196775	1.89998e-10	C	T	0.55762	40.6095
	rs10750766	11	65473798	-0.0147925	0.00216197	7.8001e-12	A	C	0.709869	46.8149
	rs10748165	12	71372390	0.0110061	0.00196411	2.1e-08	T	C	0.504155	31.4004
	rs10745954	12	103483094	-0.0143687	0.0019633	2.49977e-13	G	A	0.480326	53.5626
	rs1055582	4	39700173	0.0155609	0.00196562	2.39994e-15	T	C	0.505137	62.6715
	rs10504477	8	71338185	-0.0121174	0.00199318	1.2e-09	C	T	0.412293	36.9595
	rs10489044	4	87976387	-0.0183462	0.00246586	1e-13	G	A	0.199084	55.3548
	rs1047891	2	211540507	-0.0256666	0.00210473	3.29989e-34	A	C	0.315663	148.711
	rs10404380	19	8466254	-0.0257904	0.00201461	1.59993e-37	A	C	0.604801	163.883
	rs1037117	15	102068658	0.0161057	0.00225649	9.49948e-13	A	G	0.254731	50.9439
	rs10170658	2	238699970	-0.0132874	0.00235794	1.7e-08	T	G	0.222908	31.7552
	rs10023962	4	177959511	0.0176607	0.00254251	3.80014e-12	G	T	0.816753	48.2492
apoB	rs9894946	17	7571080	-0.0171431	0.00289199	3.09999e-09	G	A	0.841118	35.1387
	rs9884390	4	69373407	0.023248	0.00248318	7.8001e-21	C	T	0.234076	87.6506
	rs9834932	3	32535382	-0.0317059	0.00365151	3.90032e-18	G	A	0.088856	75.3937
	rs969075	20	17792323	0.0138101	0.00221388	4.39997e-10	C	T	0.664927	38.9122
	rs9616822	22	50840573	0.0159299	0.00218001	2.70023e-13	A	G	0.351376	53.396
	rs9496567	6	100602753	-0.0190492	0.00242335	3.80014e-15	A	G	0.243555	61.7904
	rs9482772	6	127446790	0.0177235	0.00208937	2.19989e-17	C	T	0.448075	71.9562
	rs9297994	8	59392324	-0.0291083	0.00220081	6.20012e-40	A	G	0.664535	174.932
	rs80276949	10	52373245	0.0419216	0.00699731	2.1e-09	A	G	0.022675	35.8933
	rs79220007	6	26098474	-0.0537922	0.00390806	4.19952e-43	C	T	0.076094	189.459
	rs79149284	19	45513854	0.0335656	0.00533765	3.2e-10	T	C	0.038377	39.5447
	rs77542162	17	67081278	0.115967	0.00701839	2.49977e-61	G	A	0.022483	273.02
	rs77498041	11	66183801	-0.0162677	0.00265126	8.50002e-10	A	G	0.19111	37.6485
	rs7746081	6	16126934	-0.0227685	0.00225861	6.70039e-24	A	G	0.30414	101.622
	rs7734476	5	122848876	0.019942	0.00208686	1.20005e-21	A	G	0.550001	91.3168
	rs77083979	1	62930106	-0.0185253	0.0030889	2e-09	A	G	0.13275	35.9685
	rs7707394	5	74472939	0.0352503	0.00216546	1.39991e-59	A	G	0.357327	264.987
	rs76186504	1	109840169	-0.11643	0.0066216	3.29989e-69	T	C	0.025023	309.175
	rs7603427	2	204317553	0.0135724	0.00207851	6.59933e-11	T	C	0.53344	42.6392
	rs7590687	2	44077225	-0.0430516	0.00398578	3.40017e-27	C	T	0.923067	116.668
	rs7569317	2	203527979	0.0180783	0.0020715	2.60016e-18	C	T	0.530625	76.1632
	rs75331444	2	44069772	-0.0903607	0.00418412	1.99986e-103	A	G	0.065607	466.392
	rs74454529	17	17432220	0.0282637	0.00439664	1.29999e-10	A	G	0.05994	41.3253
	rs73075609	20	5580789	0.0486153	0.00647857	6.20012e-14	T	C	0.026797	56.3103
	rs72823013	10	115786233	-0.0228563	0.00313773	3.19963e-13	A	G	0.126195	53.0616
	rs72663045	4	74177397	0.0423576	0.00734377	8e-09	G	T	0.020719	33.2678
	rs7249565	19	11302807	0.0145524	0.00208362	2.90001e-12	A	G	0.41494	48.7789
	rs71311871	3	58420613	-0.0263353	0.00377144	2.90001e-12	G	A	0.08307	48.7598
	rs7108486	11	5677158	-0.0428485	0.00689551	5.19996e-10	C	T	0.023722	38.6134
	rs7012637	8	9173209	0.0200133	0.00209504	1.29987e-21	A	G	0.473809	91.2542
	rs6940814	6	42924932	-0.0199476	0.00210823	2.99985e-21	G	A	0.587465	89.5252
	rs6874202	5	156391628	0.0312135	0.00215543	1.59993e-47	C	T	0.634225	209.709
	rs67038483	21	33096103	0.0278083	0.0050196	2.99999e-08	T	C	0.044994	30.691
	rs6689611	1	109831268	-0.132408	0.00950251	3.90032e-44	A	G	0.012374	194.156
	rs6602909	13	114551993	0.021441	0.0022203	4.60045e-22	C	T	0.327566	93.2538
	rs6560499	9	78730766	-0.0121606	0.00211507	8.99995e-09	A	G	0.575961	33.0568
	rs6475606	9	22081850	-0.017332	0.00207721	7.19946e-17	T	C	0.484473	69.6204
	rs6426328	1	246891260	0.0122017	0.00207321	4e-09	T	G	0.489784	34.6381
	rs62122481	2	21216815	0.0841137	0.00214492	1e-200	A	C	0.376906	1537.84
	rs62119267	19	45134682	-0.33464	0.00708026	1e-200	C	A	0.022316	2233.87
	rs61754230	12	72179446	0.0432231	0.00745837	6.80002e-09	T	C	0.019787	33.5849
	rs6073958	20	44551855	0.0423193	0.00260555	2.49977e-59	C	T	0.198642	263.802
	rs6072279	20	39755154	0.0292319	0.00208189	8.69961e-45	A	G	0.473669	197.151
	rs597808	12	111973358	0.0216847	0.00208463	2.39994e-25	G	A	0.515902	108.205
	rs59328596	8	21928227	-0.0210021	0.00292183	6.59933e-13	A	G	0.148104	51.6673
	rs58148580	4	124758773	0.0214934	0.00332019	9.60064e-11	T	C	0.10978	41.9068
	rs55831924	8	145031968	0.0182553	0.00217539	4.79954e-17	T	C	0.361347	70.4212
	rs55714927	17	7080316	-0.0321831	0.00264686	5.10035e-34	T	C	0.190338	147.841
	rs55637835	1	55466303	-0.018802	0.00323408	6.1e-09	T	C	0.120855	33.7992
	rs556107	1	234853059	0.0358479	0.00207937	1.29987e-66	T	C	0.523242	297.21
	rs546240	11	30533622	-0.0118734	0.00214585	3.09999e-08	T	C	0.619967	30.6162
	rs4803818	19	45914283	0.0417009	0.00686676	1.29999e-09	T	C	0.023044	36.8797
	rs478975	1	234773373	0.0141364	0.00217403	7.89951e-11	A	G	0.642584	42.2811
	rs472495	1	55521313	0.0407634	0.00217172	1.29987e-78	T	G	0.649019	352.317
	rs4689088	4	7222253	0.0124572	0.00214057	5.89997e-09	A	G	0.618684	33.8674
	rs4687614	3	52492085	0.0269271	0.0045666	3.69999e-09	A	G	0.945247	34.7691
	rs4671050	2	62988169	-0.0196981	0.00222973	1e-18	T	G	0.316138	78.0448
	rs45537841	7	87110640	-0.0158986	0.00270418	4.09996e-09	T	C	0.180708	34.5658
	rs454715	19	49114236	-0.0235286	0.0020918	2.39994e-29	G	T	0.582689	126.518
	rs4307732	11	126244955	0.0481874	0.00338596	5.79963e-46	A	G	0.105893	202.537
	rs4052908	6	139842576	-0.012576	0.00217168	7.00003e-09	AATT	A	0.636165	33.5346
	rs3860846	8	126631687	0.0138403	0.00235387	4.09996e-09	T	C	0.275298	34.5721
	rs3823376	6	29944184	0.0164137	0.00207374	2.49977e-15	T	C	0.502185	62.6476
	rs3822855	6	116316882	0.0148392	0.00211668	2.39994e-12	T	G	0.401636	49.1485
	rs3780181	9	2640759	-0.0259729	0.00417003	4.70002e-10	G	A	0.067627	38.7938
	rs3746337	20	25208272	0.0156368	0.00207666	5.10035e-14	T	C	0.489153	56.6976
	rs35882350	12	623129	0.0135528	0.0023664	1e-08	G	A	0.261055	32.8006
	rs35764292	2	21477029	0.0509038	0.00532869	1.29987e-21	G	A	0.040457	91.2556
	rs35081008	19	58662235	-0.0311143	0.00290126	7.8001e-27	T	C	0.148139	115.013
	rs3127580	6	160710851	0.0404476	0.00286539	2.99985e-45	T	C	0.155127	199.259
	rs28814720	8	141988687	0.0117382	0.00214286	4.30002e-08	G	A	0.519754	30.0065
	rs28406917	7	21449451	0.0134005	0.00210735	2e-10	T	C	0.427571	40.436
	rs2807854	1	221029841	0.0162948	0.00220437	1.39991e-13	C	T	0.671334	54.6423
	rs278981	4	40428010	0.0148256	0.00239561	6.1e-10	C	T	0.758151	38.2994
	rs2761311	10	95052021	0.012077	0.00211012	1e-08	T	C	0.571902	32.757
	rs2738447	19	11227480	0.0436273	0.00209036	9.8992e-97	C	A	0.592706	435.587
	rs2737263	8	116667539	-0.0185263	0.00231348	1.20005e-15	T	G	0.280253	64.1277
	rs2618566	20	17844684	-0.0303008	0.00219303	1.99986e-43	T	G	0.659901	190.906
	rs2446066	12	53778650	0.0155774	0.00273619	1.2e-08	T	G	0.17489	32.4114
	rs2287622	2	169830328	-0.0203449	0.00211842	7.70016e-22	G	A	0.602775	92.2331
	rs2256814	20	62373983	0.0145175	0.00261621	2.90001e-08	A	G	0.197913	30.792
	rs2238162	13	32959199	-0.0226439	0.00208185	1.50003e-27	T	C	0.522997	118.305
	rs2199048	17	73868288	-0.0132194	0.00224306	3.79997e-09	G	A	0.313756	34.733
	rs2160994	12	50650057	0.0172687	0.00217691	2.09991e-15	C	T	0.647429	62.9272
	rs2137234	4	26080549	0.0152817	0.00262327	5.69994e-09	C	T	0.195281	33.9357
	rs2073547	7	44582331	0.0312042	0.00266416	1.10002e-31	G	A	0.183953	137.185
	rs2068888	10	94839642	-0.0241729	0.00208746	5.19996e-31	A	G	0.4508	134.098
	rs2043085	15	58680954	-0.0193562	0.00213525	1.20005e-19	C	T	0.612252	82.1756
	rs200046586	19	45241248	0.412271	0.00778939	1e-200	C	CA	0.981247	2801.29
	rs1888488	21	40686521	0.0173586	0.00210255	1.50003e-16	T	C	0.565289	68.1611
	rs188608977	1	109725404	0.0621212	0.0103688	2.1e-09	T	G	0.010581	35.8941
	rs183130	16	56991363	-0.0478017	0.00222241	1.30017e-102	T	C	0.323911	462.635
	rs1801689	17	64210580	0.0646379	0.00603967	9.8992e-27	C	A	0.030529	114.538
	rs17569873	20	62896110	0.0183445	0.00259488	1.59993e-12	T	C	0.201289	49.9778
	rs17476364	10	71094504	-0.0209325	0.00334727	4e-10	C	T	0.108391	39.1076
	rs174564	11	61588305	-0.0450573	0.00218206	1e-94	G	A	0.348509	426.38
	rs17050272	2	121306440	-0.0244302	0.00210465	3.80014e-31	A	G	0.40926	134.739
	rs17036085	1	109834039	-0.0684968	0.00943874	4.00037e-13	G	A	0.012178	52.6638
	rs1561139	16	56852822	-0.0131421	0.0021042	4.20001e-10	T	G	0.424334	39.0082
	rs1556562	1	93034023	0.0159957	0.00247804	1.09999e-10	T	G	0.790018	41.6668
	rs150503754	19	45579242	-0.0517861	0.00867735	2.39999e-09	C	T	0.014979	35.6166
	rs150474434	2	118845121	-0.0343097	0.00345194	2.80027e-23	A	G	0.101399	98.7887
	rs148933445	19	45302504	-0.573249	0.00759178	1e-200	A	G	0.021557	5701.63
	rs146534110	6	160578069	0.0667337	0.00906368	1.80011e-13	T	G	0.013315	54.2102
	rs145730801	14	94768196	0.0374641	0.00515235	3.59998e-13	C	T	0.044385	52.8713
	rs141469619	11	116714293	0.0785766	0.011117	1.59993e-12	G	A	0.00989	49.9587
	rs138692741	19	45467132	0.0714986	0.00568647	2.99985e-36	T	C	0.035781	158.092
	rs138354	22	41272143	-0.0120708	0.00208392	6.90001e-09	C	T	0.534598	33.5514
	rs138026891	2	21086334	-0.0687023	0.0101987	1.59993e-11	T	C	0.010569	45.3788
	rs13702	8	19824492	-0.0295019	0.00229451	7.8001e-38	C	T	0.287911	165.318
	rs1358980	6	43764551	0.0149035	0.00209447	1.10002e-12	T	C	0.483147	50.6324
	rs13389219	2	165528876	-0.0161286	0.00211805	2.60016e-14	T	C	0.392571	57.9857
	rs13379043	14	74250126	-0.0143675	0.00235876	1.09999e-09	C	T	0.280473	37.1018
	rs13247874	7	73010442	-0.0215939	0.00261336	1.39991e-16	T	C	0.197154	68.2753
	rs13230111	7	130437124	-0.0138317	0.00207813	2.80027e-11	G	A	0.492349	44.3002
	rs13108218	4	3443931	-0.0229367	0.00215262	1.59993e-26	G	A	0.614849	113.534
	rs13076933	3	12327431	-0.0182624	0.00238248	1.80011e-14	G	T	0.259424	58.7567
	rs12916	5	74656539	0.0549288	0.00212005	5.19996e-148	C	T	0.400485	671.287
	rs1277762	10	18494666	0.0171563	0.00286751	2.19999e-09	T	C	0.843312	35.7962
	rs12691088	19	45418486	0.246111	0.00769582	1e-200	A	G	0.02091	1022.71
	rs12603290	17	45650196	-0.0288448	0.00207989	9.79941e-44	C	T	0.514724	192.333
	rs1260326	2	27730940	-0.0495555	0.00211469	1.90108e-121	C	T	0.604525	549.149
	rs1250258	2	216300185	0.0141509	0.00235577	1.89998e-09	T	C	0.736741	36.083
	rs12471768	2	64928603	0.0139101	0.00226938	8.79995e-10	C	T	0.704041	37.5704
	rs12469941	2	135629927	0.0134202	0.00209668	1.5e-10	T	C	0.400959	40.9688
	rs1229984	4	100239319	0.0385152	0.00631264	1.09999e-09	C	T	0.97281	37.2256
	rs12208357	6	160543148	0.0629791	0.0040818	1e-53	T	C	0.07008	238.062
	rs12054451	3	122064369	0.0159506	0.00238162	2.09991e-11	G	T	0.259497	44.8548
	rs12046278	1	10799577	-0.0156231	0.00217266	6.4003e-13	C	T	0.34509	51.7072
	rs11901691	2	43850522	0.0142576	0.00211213	1.50003e-11	A	C	0.577074	45.5671
	rs118039278	6	160985526	0.0868026	0.00387054	2.19786e-111	A	G	0.078706	502.947
	rs117733303	6	160922870	0.0864463	0.00771098	3.59998e-29	G	A	0.01842	125.682
	rs11709868	3	142648844	-0.015551	0.00228244	9.49948e-12	T	G	0.297035	46.4214
	rs116734477	5	52095024	-0.0633493	0.00526644	2.49977e-33	T	C	0.040814	144.694
	rs11621792	14	24871926	0.0210752	0.00210348	1.29987e-23	T	C	0.452905	100.384
	rs116093870	10	103984390	0.0261595	0.0041275	2.30001e-10	C	T	0.06791	40.1684
	rs11601507	11	5701074	0.0414121	0.004036	1.10002e-24	A	C	0.069438	105.282
	rs11591147	1	55505647	-0.345954	0.00790085	1e-200	T	G	0.017452	1917.3
	rs115692156	2	21077208	-0.11153	0.0118551	5.10035e-21	G	A	0.00884	88.5061
	rs11568318	2	234665498	0.0288066	0.0041573	4.19952e-12	A	C	0.066251	48.0133
	rs113177823	3	132217703	-0.0412221	0.00464641	7.19946e-19	A	G	0.054098	78.7091
	rs112758337	7	97977268	-0.0212571	0.00267849	2.09991e-15	A	G	0.185556	62.9837
	rs112220485	17	40522713	0.0205179	0.0037343	3.89996e-08	C	T	0.085608	30.1889
	rs11099097	4	81167309	-0.0161746	0.00229432	1.80011e-12	T	C	0.291413	49.7003
	rs11057837	12	125311720	0.0217967	0.00344421	2.5e-10	T	C	0.102576	40.05
	rs11057397	12	124419728	-0.0183422	0.00220085	7.8001e-17	T	C	0.337102	69.4579
	rs11047939	12	9061971	0.0152893	0.00250351	1e-09	A	G	0.224841	37.2972
	rs10953298	7	100216773	-0.0170824	0.00245825	3.69999e-12	T	C	0.236254	48.2887
	rs10832963	11	18664241	0.0219536	0.00238777	3.80014e-20	G	T	0.744199	84.533
	rs10794579	10	124686656	0.0137267	0.00210335	6.79986e-11	C	T	0.575021	42.5902
	rs10448340	9	139320069	-0.0170557	0.00223016	1.99986e-14	G	T	0.319766	58.488
	rs10201242	2	158464849	-0.0226288	0.00397212	1.2e-08	A	G	0.073779	32.4548
	rs10087526	8	55433151	0.0187619	0.00260759	6.20012e-13	G	T	0.198764	51.7696
	rs1003533	5	131755651	-0.0200281	0.00266165	5.30029e-14	T	C	0.188327	56.621

## Sheet: Table S3
Supplementary Table S3. Summarized data for the genetic variants associated with vascular dementia
Exposure	IVs	Chromosome	Base pair	Beta	SE	p	Effect allele	other allele	Maf	mean F-statistic
VaD vs. HDL-C
	rs8045124	16	1624538	-0.2722	0.0497	4.26e-08	C	T	0.4807	29.996
	rs541505651	6	69122336	4.4992	0.7761	6.75e-09	A	G	0.001831	33.6074
	rs189729995	6	69165891	4.5266	0.78	6.5e-09	T	G	0.001824	33.6787
	rs185762938	6	69138576	4.4992	0.7761	6.75e-09	A	G	0.001831	33.6074
	rs184931585	6	69131989	4.4992	0.7761	6.75e-09	A	G	0.001831	33.6074
VaD vs. LDL-C
	rs8045124	16	1624538	-0.2722	0.0497	4.257e-08	C	T	0.4807	29.996
	rs541505651	6	69122336	4.4992	0.7761	6.75e-09	A	G	0.001831	33.6074
	rs189729995	6	69165891	4.5266	0.78	6.5e-09	T	G	0.001824	33.6787
	rs185762938	6	69138576	4.4992	0.7761	6.75e-09	A	G	0.001831	33.6074
	rs184931585	6	69131989	4.4992	0.7761	6.75e-09	A	G	0.001831	33.6074
VaD vs. TG
	rs8045124	16	1624538	-0.2722	0.0497	4.257e-08	C	T	0.4807	29.996
	rs541505651	6	69122336	4.4992	0.7761	6.75e-09	A	G	0.001831	33.6074
	rs189729995	6	69165891	4.5266	0.78	6.5e-09	T	G	0.001824	33.6787
	rs185762938	6	69138576	4.4992	0.7761	6.75e-09	A	G	0.001831	33.6074
	rs184931585	6	69131989	4.4992	0.7761	6.75e-09	A	G	0.001831	33.6074
VaD vs. apoA-I
	rs8045124	16	1624538	-0.2722	0.0497	4.257e-08	C	T	0.4807	29.996
	rs541505651	6	69122336	4.4992	0.7761	6.75e-09	A	G	0.001831	33.6074
	rs189729995	6	69165891	4.5266	0.78	6.5e-09	T	G	0.001824	33.6787
	rs185762938	6	69138576	4.4992	0.7761	6.75e-09	A	G	0.001831	33.6074
	rs184931585	6	69131989	4.4992	0.7761	6.75e-09	A	G	0.001831	33.6074
VaD vs. apoB
	rs8045124	16	1624538	-0.2722	0.0497	4.257e-08	C	T	0.4807	29.996
	rs541505651	6	69122336	4.4992	0.7761	6.75e-09	A	G	0.001831	33.6074
	rs189729995	6	69165891	4.5266	0.78	6.5e-09	T	G	0.001824	33.6787
	rs185762938	6	69138576	4.4992	0.7761	6.75e-09	A	G	0.001831	33.6074
	rs184931585	6	69131989	4.4992	0.7761	6.75e-09	A	G	0.001831	33.6074

## Sheet: Table S4
Supplementary Table S4. Causal effects of vascular dementia on lipid-related traits levels via reverse MR analyses
Phenotypes	IVs	OR (95% CI)	Beta (SE)	p	Q statistic_p
HDL-C
IVW	5	0.997 (0.994-0.999)	-0.003 (0.001)	0.022	0.977
Weighted median	5	0.997 (0.993-1.000)	-0.003 (0.002)	0.053
Penalised weighted median	5	0.997 (0.993-1.000)	-0.003 (0.002)	0.061
MR-PRESSO	5		-0.003 (0.0005)	0.003
global test				0.981
MR-Egger	5	0.997 (0.994-1.000)	-0.003 (0.002)	0.178
egger_intercept			-0.001 (0.002)	0.601
LDL-C
IVW	5	1.002 (0.998-1.005)	0.002 (0.002)	0.327	0.999
Weighted median	5	1.001 (0.998-1.005)	0.001 (0.002)	0.411
Penalised weighted median	5	1.001 (0.998-1.005)	0.001 (0.002)	0.428
MR-PRESSO	5		0.002 (0.0002)	0.002
global test				0.997
MR-Egger	5	1.001 (0.998-1.005)	0.001(0.002)	0.504
egger_intercept			0.001(0.002)	0.83
TG
IVW	5	1.001 (0.998-1.004)	0.001 (0.002)	0.38	0.978
Weighted median	5	1.001 (0.998-1.005)	0.001 (0.002)	0.543
Penalised weighted median	5	1.001 (0.998-1.005)	0.001 (0.002)	0.544
MR-PRESSO	5		0.001 (0.0005)	0.06
global test				0.977
MR-Egger	5	1.001 (0.997-1.004)	0.001 (0.002)	0.642
egger_intercept			0.001 (0.002)	0.618
apoA-I
IVW	5	0.998 (0.995-1.001)	-0.002 (0.002)	0.107	0.69
Weighted median	5	0.998 (0.995-1.001)	-0.002 (0.002)	0.25
Penalised weighted median	5	0.998 (0.995-1.001)	-0.002 (0.002)	0.252
MR-PRESSO	5		-0.002 (0.001)	0.098
global test				0.796
MR-Egger	5	0.999 (0.995-1.002)	-0.001 (0.002)	0.514
egger_intercept			-0.003 (0.002)	0.238
apoB
IVW	5	1.002 (0.999-1.005)	0.002 (0.002)	0.226	0.993
Weighted median	5	1.002 (0.998-1.005)	0.002 (0.002)	0.36
Penalised weighted median	5	1.002 (0.998-1.005)	0.002 (0.002)	0.353
MR-PRESSO	5		0.002 (0.0004)	0.008
global test				0.991
MR-Egger	5	1.002 (0.998-1.005)	0.002 (0.002)	0.457
egger_intercept			0.001 (0.002)	0.673
Beta is the estimated effect size. P <0.05 were considered statistically significant.
CI: confidence intervals; IVs: instrumental variables; IVW, inverse-variance weighted; MR mendelian randomization;
MR-PRESSO: Pleiotropy Residual Sum and Outlier; OR: odds ratio; SE, standard error; SNP, single-nucleotide polymorphism; HDL-C, high-density lipoprotein cholesterol; LDL-C, low-density lipoprotein cholesterol ; TG: triglyceride; apoA-I: apolipoprotein A-I; apoB: apolipoprotein B.

## Sheet: Table S5
Supplementary Table S5. Summarized data for the genetic variants associated with lipid-related traits via mvMR
Exposure	IVs	Chromosome	Base pair	Beta	SE	p	Effect allele	Other allele	Eaf	mean F-statistic
Model 1
HDL-C	rs9989419	16	56951227	0.144	0.002	1e-200	G	A	0.605917	5184
	rs9987289	8	9325848	0.087	0.003	9.1e-155	G	A	0.908737	841
	rs998584	6	43790159	-0.034	0.002	1.1e-71	A	C	0.482733	289
	rs9933509	16	53784255	-0.014	0.002	2.4e-13	C	T	0.413899	49
	rs9916613	17	30355435	-0.013	0.002	2.3e-11	A	T	0.356493	42.25
	rs990619	4	155586526	-0.005	0.002	0.0109999	G	C	0.524155	6.25
	rs9884390	4	68507689	0.016	0.002	2.3e-12	C	T	0.234083	64
	rs983663	18	22098576	-0.014	0.002	7.7e-11	G	A	0.251682	49
	rs9834932	3	32493890	0.001	0.003	0.7	G	A	0.08896	0.111111
	rs968050	6	98126684	0.014	0.002	8.1e-13	T	C	0.48238	49
	rs9647335	3	136161568	0.028	0.002	2.4e-30	T	A	0.191928	196
	rs964184	11	116778201	0.105	0.003	1e-200	C	G	0.866364	1225
	rs9622830	22	38558698	-0.016	0.002	2.6e-16	G	C	0.354212	64
	rs9604045	13	113272893	0.018	0.002	2e-14	T	G	0.253572	81
	rs9496567	6	100154877	-0.001	0.002	0.77	A	G	0.243536	0.25
	rs9465693	6	20312889	-0.012	0.002	6.2e-09	A	C	0.304872	36
	rs934197	2	21044589	-0.008	0.002	0.000109999	A	G	0.335298	16
	rs9327468	5	128106169	-0.015	0.002	1.9e-11	A	C	0.755398	56.25
	rs9289196	3	122549659	0.003	0.003	0.19	C	T	0.173628	1
	rs921919	12	124780655	-0.042	0.002	1.4e-90	A	G	0.669162	441
	rs880674	4	2248382	0.015	0.003	4.4e-08	C	T	0.142056	25
	rs880315	1	10736809	0	0.002	0.81	C	T	0.340117	0
	rs830620	3	71629997	0.015	0.002	9.6e-15	T	C	0.415386	56.25
	rs8107974	19	19277691	-0.008	0.004	0.0259998	T	A	0.075859	4
	rs8086351	18	49645518	0.084	0.003	1e-200	G	C	0.824212	784
	rs8081548	17	7535517	0.018	0.002	6.9e-20	A	T	0.658521	81
	rs8014289	14	74910649	0.015	0.002	4.6e-15	G	A	0.562282	56.25
	rs80005209	8	20014828	-0.144	0.006	2.5e-144	G	T	0.029614	576
	rs79828839	10	50592671	-0.003	0.002	0.17	T	C	0.198849	2.25
	rs79634051	11	14540399	0.039	0.006	9e-12	C	G	0.028177	42.25
	rs79600951	16	56800342	-0.107	0.003	1e-200	G	C	0.092057	1272.11
	rs7924036	10	63431885	0.014	0.002	3.6e-13	T	G	0.503377	49
	rs79220007	6	26098246	-0.008	0.004	0.0350002	C	T	0.076188	4
	rs79153732	8	19805426	-0.094	0.007	4.2e-38	T	C	0.017377	180.327
	rs7853377	9	83937290	0.015	0.002	4.7e-11	G	A	0.216224	56.25
	rs7826177	8	34549022	0.011	0.002	1.4e-08	C	T	0.635428	30.25
	rs7817574	8	143220400	0.033	0.002	3.5e-42	C	T	0.185003	272.25
	rs78058190	2	218835276	-0.078	0.005	1.8e-57	A	G	0.050415	243.36
	rs77960347	18	49583585	0.291	0.008	1e-200	G	A	0.013349	1323.14
	rs7794796	7	150843108	-0.017	0.002	1.2e-16	T	C	0.332335	72.25
	rs77767539	20	46172917	0.045	0.008	3.6e-08	A	G	0.014299	31.6406
	rs77605964	7	107322503	0.017	0.002	7.5e-14	A	G	0.226924	72.25
	rs77542162	17	69085137	-0.009	0.006	0.14	G	A	0.022455	2.25
	rs7746081	6	16126703	0.001	0.002	0.75	A	G	0.304325	0.25
	rs7734476	5	123513182	0	0.002	0.95	A	G	0.550071	0
	rs77320712	3	153521088	-0.013	0.002	1.9e-08	T	G	0.235452	42.25
	rs7725218	5	1282299	-0.012	0.002	1.2e-09	A	G	0.338422	36
	rs771481	1	93381096	0.029	0.002	9.1e-32	A	T	0.18382	210.25
	rs76962725	1	224239431	-0.028	0.005	4.6e-08	A	G	0.037253	31.36
	rs76602912	20	58884813	-0.043	0.006	4e-12	C	T	0.023789	51.3611
	rs76247316	3	160364496	-0.011	0.002	2.4e-09	C	T	0.479856	30.25
	rs7583067	2	100180388	0.015	0.002	6.6e-11	T	C	0.240114	56.25
	rs75662196	8	20084145	0.068	0.006	6.7e-31	C	G	0.027941	128.444
	rs75609851	8	20013569	0.17	0.01	1.4e-69	A	G	0.010454	289
	rs75479205	6	7255377	0.014	0.002	1.2e-08	G	A	0.189496	49
	rs75246752	1	145804971	0.049	0.008	5.4e-09	C	G	0.012897	37.5156
	rs75152587	16	56546049	-0.094	0.008	1.1e-28	T	G	0.012738	138.062
	rs75032664	8	19834914	-0.055	0.009	1.3e-09	G	C	0.012909	37.3457
	rs7488780	12	20426458	0.015	0.002	8.5e-10	C	G	0.204263	56.25
	rs74500135	9	103841535	0.067	0.01	2.3e-11	C	T	0.009847	44.89
	rs73455693	18	60360263	0.028	0.005	3.9e-08	A	G	0.037231	31.36
	rs73243877	4	26045994	-0.025	0.003	2.5e-23	G	A	0.168086	69.4444
	rs73151974	7	134984772	-0.016	0.003	3.2e-09	T	C	0.144024	28.4444
	rs72926946	2	202613145	-0.021	0.002	3.1e-23	A	C	0.296376	110.25
	rs72911393	17	78394924	-0.023	0.003	3.6e-17	T	C	0.147729	58.7778
	rs7281183	21	15039346	-0.013	0.002	6.3e-09	A	G	0.737142	42.25
	rs72631343	17	69195129	0.005	0.003	0.0909997	G	C	0.128982	2.77778
	rs7202323	16	72183214	0.005	0.002	0.0269998	G	T	0.229693	6.25
	rs7186799	16	57186104	-0.022	0.002	5.2e-31	C	A	0.437388	121
	rs7170463	15	41596720	0.019	0.002	4.2e-20	G	A	0.311432	90.25
	rs71647892	16	66963853	-0.063	0.009	5.2e-13	C	T	0.011842	49
	rs71603401	4	18032840	-0.015	0.003	3.2e-08	G	A	0.136851	25
	rs7158166	14	102775462	0.014	0.002	5.1e-13	C	T	0.593856	49
	rs71311871	3	58434886	-0.01	0.003	0.00350002	G	A	0.083274	11.1111
	rs703966	10	79194494	0.016	0.002	4.9e-16	A	G	0.418881	64
	rs7036107	9	89562982	-0.012	0.002	2.9e-10	G	A	0.51098	36
	rs6939861	6	41735303	-0.014	0.002	9.7e-11	A	G	0.261916	49
	rs6874202	5	156964617	0.008	0.002	7.5e-05	C	T	0.634098	16
	rs686030	9	15304784	0.05	0.003	6.5e-74	A	C	0.858823	277.778
	rs6824451	4	88801914	-0.02	0.002	1e-25	A	G	0.464071	100
	rs680321	18	32217995	0.011	0.002	1.5e-08	C	T	0.456556	30.25
	rs6765484	3	50003880	0.023	0.002	3.9e-32	T	C	0.472827	132.25
	rs6762415	3	133759713	-0.011	0.002	1.2e-08	G	T	0.535292	30.25
	rs6732741	2	20894274	0	0.003	0.92	A	T	0.119439	0
	rs6709904	2	43853185	-0.005	0.003	0.0830004	G	A	0.112372	2.77778
	rs6680227	1	109256292	0.027	0.005	9.8e-08	A	G	0.035116	29.16
	rs6602912	13	113843576	0.003	0.002	0.21	G	T	0.284922	2.25
	rs6544713	2	43846742	-0.005	0.002	0.0129999	C	T	0.677083	6.25
	rs6475606	9	22081851	-0.002	0.002	0.34	T	C	0.484427	1
	rs6469605	8	115589667	0.032	0.002	5.8e-61	T	C	0.568501	256
	rs6460894	7	12207704	-0.012	0.002	1.6e-09	C	T	0.339247	36
	rs635769	6	139510844	0.02	0.002	1.4e-23	C	T	0.628046	100
	rs62428831	6	142926024	0.018	0.003	1e-10	C	T	0.141547	36
	rs62271373	3	150348753	-0.041	0.004	2.5e-23	A	T	0.059972	105.063
	rs62246443	3	47130917	-0.015	0.003	3.8e-09	C	T	0.174261	25
	rs62102718	19	33400107	-0.024	0.002	3.4e-29	T	A	0.286413	144
	rs61884005	11	14381384	0.016	0.003	2.4e-08	G	C	0.121445	28.4444
	rs61805075	1	182167266	-0.026	0.002	6e-37	A	G	0.328694	169
	rs61754230	12	71785666	-0.013	0.007	0.0569994	T	C	0.019805	3.44898
	rs61748951	1	156068267	-0.036	0.006	1.7e-08	A	C	0.024073	36
	rs61596977	8	94984937	-0.016	0.003	3.1e-09	T	C	0.140363	28.4444
	rs61435086	8	20052781	0.089	0.009	3.7e-25	C	T	0.012312	97.7901
	rs6142206	20	34624251	-0.016	0.002	8.3e-17	A	G	0.42072	64
	rs61352607	12	57445390	0.031	0.002	4.4e-43	T	G	0.240851	240.25
	rs6123685	20	57260984	0.016	0.002	3e-13	A	G	0.254745	64
	rs6073958	20	45923216	-0.061	0.002	4.1e-143	C	T	0.198804	930.25
	rs6066148	20	46973398	0.013	0.002	1e-09	C	G	0.259964	42.25
	rs6059958	20	31555475	0.015	0.003	9.7e-09	T	C	0.170742	25
	rs6018652	20	47712230	0.026	0.002	4.6e-28	A	G	0.792888	169
	rs59781045	11	117224567	0.074	0.004	4.5e-85	T	C	0.068117	342.25
	rs59104589	2	241298487	0.015	0.002	3.5e-14	T	C	0.358286	56.25
	rs58298943	12	56997508	0.02	0.003	3.8e-09	T	C	0.084318	44.4444
	rs58123204	12	53366378	-0.018	0.003	2.9e-12	G	A	0.153445	36
	rs564832	11	30396699	-0.012	0.002	1.2e-08	C	T	0.315005	36
	rs56130071	7	21559135	-0.001	0.002	0.8	C	G	0.217016	0.25
	rs559355	11	75740236	-0.035	0.003	9e-41	T	A	0.1573	136.111
	rs55714927	17	7176997	0.004	0.002	0.0779992	T	C	0.190291	4
	rs55637835	1	55000630	0.004	0.003	0.19	T	C	0.120861	1.77778
	rs556107	1	234717312	0.015	0.002	7.1e-15	T	C	0.523253	56.25
	rs549058	13	50626909	0.017	0.003	5.7e-09	T	G	0.120319	32.1111
	rs4970834	1	109272258	0.023	0.002	1.1e-21	T	C	0.186534	132.25
	rs4930352	11	66299522	0.016	0.002	7.3e-17	T	G	0.494128	64
	rs4875043	8	143414602	-0.015	0.002	1.3e-10	C	A	0.216821	56.25
	rs4871624	8	125617084	-0.02	0.002	3.9e-22	G	T	0.286726	100
	rs4855582	3	109148858	0.011	0.002	6.5e-09	T	C	0.429621	30.25
	rs4804101	19	7220734	-0.014	0.002	5.3e-13	T	G	0.438994	49
	rs4784709	16	56677463	-0.075	0.005	3e-55	A	T	0.959159	225
	rs472495	1	55055640	0.007	0.002	0.000870001	T	G	0.648999	12.25
	rs4691379	4	156785752	0.012	0.002	6.2e-09	T	C	0.318939	36
	rs4666384	2	20375251	-0.007	0.002	0.000280001	G	A	0.67889	12.25
	rs4650994	1	178546177	-0.018	0.002	2.1e-21	A	G	0.531842	81
	rs4614	11	119081661	-0.018	0.002	3.8e-20	G	A	0.406222	81
	rs460428	22	29575000	-0.014	0.002	2.5e-10	C	T	0.230673	49
	rs454968	5	112852759	0.011	0.002	3.2e-08	C	T	0.644812	30.25
	rs440677	19	11174714	-0.005	0.002	0.012	A	G	0.622943	6.25
	rs429358	19	44908684	-0.076	0.003	8.71e-181	C	T	0.154325	641.778
	rs4263041	19	44935386	0.019	0.002	6.5e-16	G	A	0.283539	90.25
	rs42125	7	73409447	-0.04	0.007	1.3e-08	G	A	0.023208	32.6531
	rs4074448	15	63596296	0.015	0.002	1.3e-14	A	G	0.589254	56.25
	rs407133	21	45151974	-0.011	0.002	4.6e-08	C	G	0.558791	30.25
	rs3924313	12	124843829	-0.024	0.002	1.6e-31	A	G	0.322221	144
	rs3822855	6	115995719	0.016	0.002	8.3e-17	T	G	0.401767	64
	rs3814883	16	29983601	-0.015	0.002	5.9e-16	T	C	0.482467	56.25
	rs3794752	17	55305468	0.013	0.002	2e-09	C	T	0.280634	42.25
	rs3780181	9	2640759	-0.01	0.004	0.0109999	G	A	0.067726	6.25
	rs3768321	1	39570256	-0.045	0.002	1.5e-79	T	G	0.196691	506.25
	rs3747973	1	205708020	0.014	0.002	2.7e-13	G	A	0.592542	49
	rs3746915	21	42298682	0.011	0.002	2.1e-08	G	A	0.580939	30.25
	rs3732356	3	119810266	-0.03	0.004	1e-14	T	G	0.933782	56.25
	rs367070	19	54296648	0.042	0.002	1.3e-74	G	A	0.225571	441
	rs36057735	6	31352146	-0.03	0.002	1e-36	G	C	0.199089	225
	rs35882350	12	513963	-0.002	0.002	0.33	G	A	0.260785	1
	rs35511051	19	58154450	0.001	0.002	0.8	A	C	0.210219	0.25
	rs35493868	7	73625076	0.037	0.002	3e-55	G	C	0.202024	342.25
	rs34940374	7	150634289	-0.017	0.002	5.3e-12	A	G	0.182973	72.25
	rs343	8	19953276	0.134	0.003	1e-200	A	C	0.08307	1995.11
	rs34138141	17	42629543	-0.018	0.002	1.6e-16	T	G	0.280655	81
	rs34045894	10	33678561	-0.017	0.003	4.6e-11	A	G	0.15624	32.1111
	rs330089	8	9292102	0.02	0.003	1.4e-10	C	T	0.098081	44.4444
	rs3184504	12	111446804	0.027	0.002	3.9e-44	C	T	0.517322	182.25
	rs308	8	19959965	0.127	0.007	1.1e-79	G	T	0.020639	329.163
	rs2943645	2	226234464	-0.043	0.002	5.9e-106	T	C	0.646663	462.25
	rs2925979	16	81501185	0.037	0.002	1.6e-73	C	T	0.699999	342.25
	rs2910949	5	39522379	0.013	0.002	2e-11	G	T	0.354888	42.25
	rs28615248	8	54538633	0.004	0.002	0.13	C	T	0.1963	4
	rs28601761	8	125487789	0.032	0.002	9.3e-60	G	C	0.418796	256
	rs28510484	15	31345366	-0.015	0.003	1.2e-09	C	G	0.170462	25
	rs28362901	15	74420596	-0.024	0.003	1.2e-12	A	C	0.088332	64
	rs2814982	6	34578783	-0.028	0.003	1.6e-18	T	C	0.102216	87.1111
	rs2804894	10	33358163	0.017	0.002	2.3e-15	A	G	0.734831	72.25
	rs2800710	6	127131436	-0.02	0.002	1.8e-26	C	T	0.51821	100
	rs2792751	10	112180571	-0.036	0.002	3.2e-64	C	T	0.725031	324
	rs2750411	6	138905493	-0.011	0.002	1.4e-08	G	T	0.4919	30.25
	rs2740488	9	104899461	-0.069	0.002	1e-200	C	A	0.265328	1190.25
	rs2738447	19	11116804	-0.007	0.002	0.000350002	C	A	0.592591	12.25
	rs2723065	2	65052280	0.015	0.002	2.4e-14	G	A	0.376773	56.25
	rs267738	1	150968149	0.021	0.002	9.9e-21	G	T	0.219354	110.25
	rs2645979	12	83623264	0.011	0.002	8.7e-09	A	G	0.357369	30.25
	rs2642438	1	220796686	0.028	0.002	2.1e-40	G	A	0.702698	196
	rs2618566	20	17864040	0	0.002	0.87	T	G	0.659944	0
	rs2586116	17	40349572	-0.016	0.002	7.1e-14	G	C	0.259435	64
	rs254562	5	135105767	-0.011	0.002	3.4e-09	G	A	0.409277	30.25
	rs2520096	9	134054294	0.015	0.002	7.7e-12	G	A	0.270192	56.25
	rs2516331	1	212243647	0.013	0.002	1.1e-10	A	C	0.375524	42.25
	rs2498786	14	104796031	-0.025	0.002	2.6e-38	G	C	0.615979	156.25
	rs2435307	18	23547946	0.016	0.002	1.5e-17	T	C	0.48634	64
	rs2417125	9	128799953	-0.013	0.002	5.2e-10	G	A	0.284014	42.25
	rs235314	21	44851537	-0.018	0.002	2.4e-20	T	C	0.532212	81
	rs2339234	5	171185542	-0.012	0.002	7.3e-09	A	G	0.683004	36
	rs2302263	11	64254349	-0.036	0.003	1.6e-27	T	C	0.088695	144
	rs2298632	1	23383982	0.014	0.002	9.7e-14	T	C	0.498073	49
	rs2298624	18	49902652	0.03	0.003	1.1e-26	T	C	0.132532	100
	rs2298214	1	999842	-0.012	0.002	1.6e-10	A	C	0.577365	36
	rs2297409	9	104813965	-0.033	0.002	1e-43	A	G	0.194635	272.25
	rs2290866	8	104895605	-0.012	0.002	4.6e-08	T	C	0.253153	36
	rs2287622	2	168973818	-0.008	0.002	2.1e-05	G	A	0.602675	16
	rs2268840	3	186213385	0.017	0.002	2.2e-14	C	T	0.22846	72.25
	rs2256609	22	21570728	-0.033	0.002	2.2e-41	G	A	0.189238	272.25
	rs2247355	8	102864552	0.021	0.002	5.1e-17	T	C	0.182679	110.25
	rs2238162	13	32385062	0.002	0.002	0.42	T	C	0.52309	1
	rs2237035	4	54660085	0.014	0.002	1.2e-12	T	G	0.385886	49
	rs2236464	21	45478260	-0.016	0.002	3.7e-11	C	T	0.212102	64
	rs2159607	3	52467435	-0.024	0.002	7.2e-23	T	G	0.810874	144
	rs2155220	11	76555128	-0.011	0.002	3.8e-08	T	C	0.437951	30.25
	rs2098918	4	37149911	0.012	0.002	5.8e-10	T	C	0.45513	36
	rs2098368	7	36229675	-0.012	0.002	1.8e-09	T	C	0.54591	36
	rs2073547	7	44542732	-0.003	0.002	0.26	G	A	0.184118	2.25
	rs2068888	10	93079885	0.019	0.002	1.3e-23	A	G	0.450441	90.25
	rs2066714	9	104824472	0.047	0.003	3.4e-60	C	T	0.128622	245.444
	rs201441	7	102094047	-0.011	0.002	1.4e-08	G	T	0.580679	30.25
	rs1970811	10	125007927	-0.012	0.002	1.4e-09	C	T	0.457743	36
	rs1955512	14	32706616	0.011	0.002	2.4e-08	A	G	0.575802	30.25
	rs1862205	5	109320934	0.011	0.002	5.8e-09	A	G	0.404725	30.25
	rs183906992	7	95382636	0.029	0.005	5.5e-10	C	T	0.04275	33.64
	rs1771582	1	161644700	0.013	0.002	6e-11	G	T	0.557402	42.25
	rs17713879	2	254215	0.014	0.002	2e-12	A	G	0.364695	49
	rs1760940	14	20470092	0.012	0.002	3.9e-08	C	A	0.24702	36
	rs174566	11	61824890	-0.056	0.002	1.2e-174	G	A	0.350061	784
	rs17309930	11	27726946	-0.022	0.002	1.5e-20	A	C	0.205132	121
	rs17138358	7	17880630	-0.027	0.002	2.2e-44	C	G	0.398392	182.25
	rs17124112	14	88139165	-0.021	0.004	3.8e-09	A	C	0.07993	27.5625
	rs17050272	2	120548864	0.006	0.002	0.000790005	A	G	0.409314	9
	rs16928809	11	2915722	-0.026	0.003	1.7e-15	A	G	0.093089	75.1111
	rs1551891	19	44728555	0.029	0.003	8.7e-18	A	G	0.088324	93.4444
	rs150844304	15	43434427	-0.091	0.006	1.4e-51	C	A	0.025907	230.028
	rs150474434	2	118087545	-0.002	0.003	0.57	A	G	0.101602	0.444444
	rs150237291	18	49254644	0.045	0.007	5.1e-12	C	T	0.021799	41.3265
	rs150224153	20	44380341	-0.093	0.006	3.1e-59	T	C	0.029665	240.25
	rs147772065	9	104970249	0.029	0.005	4.1e-08	C	G	0.034794	33.64
	rs147627829	6	34367311	-0.054	0.005	2.5e-30	A	G	0.043706	116.64
	rs1471251	4	87055207	-0.019	0.002	3.6e-23	T	A	0.398159	90.25
	rs146534110	6	160157037	0.009	0.008	0.28	T	G	0.013235	1.26562
	rs145947882	17	43731839	-0.165	0.006	4.7e-161	C	A	0.026042	756.25
	rs145730801	14	94301859	-0.003	0.005	0.52	C	T	0.0444	0.36
	rs1446585	2	135649909	0.017	0.002	1.1e-14	G	A	0.244295	72.25
	rs144033177	20	590823	-0.056	0.008	1.4e-12	C	A	0.015822	49
	rs1431659	8	72526835	0.013	0.002	2.3e-09	G	A	0.728463	42.25
	rs143020224	19	11076648	-0.002	0.003	0.51	G	C	0.118664	0.444444
	rs142288236	8	19988101	-0.078	0.008	1.6e-22	T	C	0.01469	95.0625
	rs141469619	11	116843577	-0.203	0.01	8.7e-89	G	A	0.009879	412.09
	rs141440048	1	182359063	0.044	0.008	7.8e-09	T	C	0.017665	30.25
	rs1412234	9	28410685	-0.012	0.002	3.9e-09	C	T	0.327133	36
	rs1411432	9	16728534	-0.014	0.002	1.3e-08	C	A	0.186415	49
	rs141062196	17	592087	-0.019	0.002	5.2e-15	A	G	0.194436	90.25
	rs140164052	16	57508330	-0.042	0.005	1.2e-14	A	G	0.031786	70.56
	rs140064750	8	20048645	-0.044	0.006	3.7e-12	C	T	0.024546	53.7778
	rs1395221	4	24625280	-0.011	0.002	1e-08	T	G	0.397646	30.25
	rs13389219	2	164672366	0.028	0.002	4.5e-46	T	C	0.392619	196
	rs13379043	14	73783423	0.02	0.002	4.7e-20	C	T	0.28042	100
	rs133015	22	38176519	0.021	0.002	1.2e-26	G	C	0.440063	110.25
	rs13269725	8	71547654	-0.026	0.004	1.9e-13	G	A	0.078342	42.25
	rs13235365	7	6416460	0.026	0.002	2.1e-33	T	C	0.273616	169
	rs13144151	4	145482013	0.018	0.003	3.8e-11	G	A	0.850001	36
	rs13137144	4	973657	0.016	0.002	1.5e-17	A	G	0.461454	64
	rs13121616	4	7210662	0.002	0.002	0.43	G	A	0.693659	1
	rs13111599	4	82995884	0.013	0.002	3.5e-09	G	A	0.737196	42.25
	rs13107325	4	102267552	-0.08	0.004	7e-109	T	C	0.074942	400
	rs13087167	3	186160351	0.017	0.002	2.9e-17	C	G	0.632997	72.25
	rs13076933	3	12285932	-0.017	0.002	1.8e-14	G	T	0.259406	72.25
	rs13066793	3	86988393	0.022	0.003	3.3e-11	G	A	0.090115	53.7778
	rs12986742	2	58748008	-0.011	0.002	3e-08	C	T	0.475905	30.25
	rs12928099	16	15056648	0.021	0.002	3.7e-25	A	C	0.29612	110.25
	rs12926854	16	85917652	0.012	0.002	9.5e-09	G	A	0.269909	36
	rs12916	5	75360714	0.01	0.002	5e-07	C	T	0.400519	25
	rs12781812	10	100131465	0.011	0.002	3.4e-08	T	G	0.400915	30.25
	rs12740811	1	171447117	-0.018	0.003	1.6e-08	G	A	0.094047	36
	rs12705595	7	109463855	0.011	0.002	2.5e-08	A	G	0.37337	30.25
	rs12686780	9	92620015	-0.016	0.003	1.2e-10	T	C	0.174998	28.4444
	rs1260326	2	27508073	0.005	0.002	0.0179999	C	T	0.604623	6.25
	rs12575456	11	47304522	0.045	0.002	1.4e-106	A	G	0.321829	506.25
	rs1250258	2	215435462	0	0.002	1	T	C	0.736549	0
	rs12475332	2	226367331	0.013	0.002	2.5e-09	G	T	0.261038	42.25
	rs12445804	16	11612244	-0.001	0.004	0.81	A	G	0.07497	0.0625
	rs1229984	4	99318162	0	0.006	0.97	C	T	0.972788	0
	rs1225053	3	131924008	-0.015	0.002	3.9e-12	C	T	0.264492	56.25
	rs12246352	10	122945791	0.01	0.003	0.00109999	G	A	0.103936	11.1111
	rs12229011	12	124599168	-0.026	0.003	7.8e-16	T	C	0.097467	75.1111
	rs12208357	6	160122116	-0.019	0.004	2e-07	T	C	0.069993	22.5625
	rs12205778	6	42947011	0.016	0.002	8.6e-14	A	G	0.258895	64
	rs12162782	22	50415197	-0.004	0.002	0.0460002	G	T	0.344191	4
	rs12046972	1	219499801	-0.015	0.002	1e-14	C	T	0.564083	56.25
	rs1183851	1	62492987	0.009	0.002	1.1e-05	C	T	0.395519	20.25
	rs118039278	6	160564494	0.018	0.004	4e-07	A	G	0.078824	20.25
	rs117847213	11	111551181	0.03	0.005	1.2e-09	G	A	0.040812	36
	rs117762989	11	62836172	-0.027	0.005	9.3e-09	T	C	0.043022	29.16
	rs117733303	6	160501838	0.01	0.007	0.16	G	A	0.018388	2.04082
	rs117291242	11	380315	-0.032	0.005	4.5e-10	T	C	0.036567	40.96
	rs117230571	13	41114931	-0.027	0.004	2.2e-13	G	A	0.076958	45.5625
	rs116857878	16	57018671	0.048	0.007	4.5e-12	T	C	0.020363	47.0204
	rs116734477	5	52799190	0.007	0.005	0.16	T	C	0.040827	1.96
	rs11664369	18	60071840	-0.023	0.002	1.8e-26	T	C	0.267061	132.25
	rs11640494	16	87996079	-0.015	0.002	6.5e-16	A	G	0.456655	56.25
	rs11631178	15	58422588	0.021	0.003	1.3e-11	C	T	0.103811	49
	rs11621792	14	24402720	0.003	0.002	0.11	T	C	0.452937	2.25
	rs11591147	1	55039974	-0.001	0.007	0.89	T	G	0.01742	0.0204082
	rs115458560	1	109519352	0.002	0.007	0.760001	C	T	0.018596	0.0816327
	rs114165349	1	26695422	-0.081	0.006	3.9e-37	C	G	0.023124	182.25
	rs113966472	16	56411282	0.032	0.006	4.8e-09	A	G	0.032408	28.4444
	rs113740515	12	122714863	0.038	0.002	1.2e-58	A	G	0.209452	361
	rs1132274	20	17615510	-0.022	0.003	1.6e-16	A	C	0.154029	53.7778
	rs1125873	9	104959142	0.016	0.002	9.6e-17	T	A	0.492135	64
	rs11254464	10	17223448	0.013	0.002	3.9e-11	C	T	0.423107	42.25
	rs11239536	10	45483150	0.029	0.002	5.5e-38	A	T	0.240967	210.25
	rs112350227	2	160235122	-0.032	0.006	4.1e-08	T	C	0.02764	28.4444
	rs11218738	11	122654243	0.023	0.002	1.4e-26	A	G	0.249489	132.25
	rs112001035	17	68827664	-0.047	0.004	3.3e-30	A	G	0.060492	138.062
	rs11171710	12	55974294	-0.011	0.002	2.8e-09	A	G	0.44814	30.25
	rs111363680	12	123682724	0.033	0.006	3.1e-08	T	C	0.031354	30.25
	rs11045171	12	20317265	0.028	0.002	4.3e-32	G	A	0.197605	196
	rs11021232	11	95587644	-0.017	0.002	1.7e-11	C	T	0.18096	72.25
	rs11009262	10	33159836	-0.023	0.004	1.2e-08	T	G	0.057318	33.0625
	rs10910476	1	234599210	0.004	0.002	0.0259998	T	C	0.555083	4
	rs1083470	2	147113546	0.012	0.002	3.4e-09	A	G	0.615717	36
	rs10786114	10	93549265	0.024	0.003	1.2e-16	T	C	0.874851	64
	rs10774439	12	6622652	0.021	0.002	1.4e-16	A	G	0.814891	110.25
	rs10750766	11	65706327	-0.019	0.002	9.2e-19	A	C	0.709866	90.25
	rs1055582	4	39698553	0.014	0.002	2.1e-13	T	C	0.505231	49
	rs10513801	3	186104564	-0.03	0.003	6.7e-28	G	T	0.137151	100
	rs10504477	8	70425950	-0.015	0.002	6.1e-15	C	T	0.412192	56.25
	rs1047891	2	210675783	-0.019	0.002	2.2e-20	A	C	0.315582	90.25
	rs1045241	5	119393591	0.016	0.002	2.6e-14	T	C	0.271252	64
	rs10448340	9	136425617	0.001	0.002	0.780001	G	T	0.319827	0.25
	rs10233430	7	1012028	-0.02	0.002	2.1e-26	C	T	0.427019	100
	rs10162642	15	58284964	-0.048	0.002	4.6e-93	A	G	0.211684	576
	rs10119644	9	114367312	0.013	0.002	1.8e-12	A	T	0.493902	42.25
	rs10108282	8	9863436	0.017	0.002	6.3e-13	A	T	0.205724	72.25
	rs10053349	5	79179600	0.012	0.002	7.9e-10	C	T	0.390258	36
	rs10031010	4	119114025	0.014	0.002	2.1e-08	A	G	0.184617	49
LDL-C	rs9989419	16	56951227	-0.019	0.002	3.1e-18	G	A	0.605822	90.25
	rs9987289	8	9325848	0.045	0.004	5.1e-36	G	A	0.908808	126.562
	rs998584	6	43790159	0.008	0.002	0.00016	A	C	0.482764	16
	rs9933509	16	53784255	-0.014	0.002	1.2e-10	C	T	0.413891	49
	rs9916613	17	30355435	-0.001	0.002	0.649999	A	T	0.356496	0.25
	rs990619	4	155586526	-0.012	0.002	1.5e-08	G	C	0.523638	36
	rs9884390	4	68507689	0.025	0.002	5.9e-24	C	T	0.234121	156.25
	rs983663	18	22098576	-0.005	0.002	0.0369999	G	A	0.251593	6.25
	rs9834932	3	32493890	-0.032	0.004	1.5e-18	G	A	0.08883	64
	rs968050	6	98126684	0	0.002	0.85	T	C	0.482402	0
	rs9647335	3	136161568	-0.008	0.003	0.00239999	T	A	0.191855	7.11111
	rs964184	11	116778201	-0.058	0.003	8.2e-79	C	G	0.866409	373.778
	rs9622830	22	38558698	0.001	0.002	0.630001	G	C	0.354259	0.25
	rs9604045	13	113272893	0.003	0.002	0.25	T	G	0.253661	2.25
	rs9496567	6	100154877	-0.017	0.002	7.8e-13	A	G	0.243458	72.25
	rs9465693	6	20312889	-0.005	0.002	0.025	A	C	0.304859	6.25
	rs934197	2	21044589	0.083	0.002	2.19785999999997e-312	A	G	0.33544	1722.25
	rs9327468	5	128106169	-0.008	0.002	0.000599998	A	C	0.755406	16
	rs9289196	3	122549659	0.017	0.003	3e-10	C	T	0.173786	32.1111
	rs921919	12	124780655	-0.005	0.002	0.0359998	A	G	0.669095	6.25
	rs880674	4	2248382	0.002	0.003	0.51	C	T	0.142048	0.444444
	rs880315	1	10736809	-0.015	0.002	5.3e-12	C	T	0.34024	56.25
	rs830620	3	71629997	0.006	0.002	0.00340001	T	C	0.415546	9
	rs8107974	19	19277691	-0.105	0.004	2.7e-158	T	A	0.075765	689.062
	rs8086351	18	49645518	0.015	0.003	3.2e-08	G	C	0.824199	25
	rs8081548	17	7535517	-0.003	0.002	0.14	A	T	0.658564	2.25
	rs8014289	14	74910649	0.009	0.002	2.2e-05	G	A	0.562382	20.25
	rs80005209	8	20014828	0.014	0.006	0.0259998	G	T	0.02958	5.44444
	rs79828839	10	50592671	0.014	0.003	2.9e-08	T	C	0.198784	21.7778
	rs79634051	11	14540399	-0.005	0.006	0.39	C	G	0.028117	0.694444
	rs79600951	16	56800342	0.008	0.004	0.0280001	G	C	0.091944	4
	rs7924036	10	63431885	0.011	0.002	5.8e-08	T	G	0.503416	30.25
	rs79220007	6	26098246	-0.057	0.004	2e-48	C	T	0.076135	203.063
	rs79153732	8	19805426	-0.003	0.008	0.719999	T	C	0.017388	0.140625
	rs7853377	9	83937290	0.002	0.003	0.55	G	A	0.216224	0.444444
	rs7826177	8	34549022	-0.003	0.002	0.21	C	T	0.635799	2.25
	rs7817574	8	143220400	-0.003	0.003	0.34	C	T	0.185021	1
	rs78058190	2	218835276	-0.001	0.005	0.83	A	G	0.050464	0.04
	rs77960347	18	49583585	0.071	0.009	7.7e-15	G	A	0.013351	62.2346
	rs7794796	7	150843108	0.002	0.002	0.33	T	C	0.332216	1
	rs77767539	20	46172917	-0.005	0.009	0.61	A	G	0.014314	0.308642
	rs77605964	7	107322503	-0.004	0.002	0.12	A	G	0.227113	4
	rs77542162	17	69085137	0.128	0.007	2.1e-74	G	A	0.022495	334.367
	rs7746081	6	16126703	-0.023	0.002	4e-25	A	G	0.304113	132.25
	rs7734476	5	123513182	0.019	0.002	3.3e-19	A	G	0.550077	90.25
	rs77320712	3	153521088	-0.004	0.002	0.08	T	G	0.235523	4
	rs7725218	5	1282299	-0.003	0.002	0.13	A	G	0.338276	2.25
	rs771481	1	93381096	0.004	0.003	0.13	A	T	0.183779	1.77778
	rs76962725	1	224239431	-0.017	0.006	0.00299999	A	G	0.037165	8.02778
	rs76602912	20	58884813	0	0.007	0.98	C	T	0.023794	0
	rs76247316	3	160364496	-0.008	0.002	0.000179999	C	T	0.479967	16
	rs7583067	2	100180388	0.005	0.002	0.0449997	T	C	0.240139	6.25
	rs75662196	8	20084145	-0.001	0.006	0.83	C	G	0.027966	0.0277778
	rs75609851	8	20013569	-0.004	0.011	0.69	A	G	0.010484	0.132231
	rs75479205	6	7255377	0.001	0.003	0.58	G	A	0.189387	0.111111
	rs75246752	1	145804971	0.019	0.009	0.0389996	C	G	0.01289	4.45679
	rs75152587	16	56546049	-0.002	0.009	0.87	T	G	0.012695	0.0493827
	rs75032664	8	19834914	-0.001	0.01	0.91	G	C	0.012818	0.01
	rs7488780	12	20426458	0.003	0.003	0.24	C	G	0.204197	1
	rs74500135	9	103841535	0.042	0.011	0.000129999	C	T	0.009882	14.5785
	rs73455693	18	60360263	0.002	0.006	0.66	A	G	0.037283	0.111111
	rs73243877	4	26045994	0.008	0.003	0.00470002	G	A	0.168142	7.11111
	rs73151974	7	134984772	-0.004	0.003	0.2	T	C	0.144006	1.77778
	rs72926946	2	202613145	-0.016	0.002	1.2e-12	A	C	0.296118	64
	rs72911393	17	78394924	-0.018	0.003	5.3e-10	T	C	0.147618	36
	rs7281183	21	15039346	-0.001	0.002	0.719999	A	G	0.73691	0.25
	rs72631343	17	69195129	-0.029	0.003	4.6e-21	G	C	0.128894	93.4444
	rs7202323	16	72183214	-0.026	0.002	6.5e-25	G	T	0.229741	169
	rs7186799	16	57186104	0.006	0.002	0.004	C	A	0.437426	9
	rs7170463	15	41596720	-0.001	0.002	0.75	G	A	0.311672	0.25
	rs71647892	16	66963853	-0.015	0.01	0.12	C	T	0.011828	2.25
	rs71603401	4	18032840	0.005	0.003	0.0810009	G	A	0.136795	2.77778
	rs7158166	14	102775462	-0.002	0.002	0.33	C	T	0.593731	1
	rs71311871	3	58434886	-0.028	0.004	7.5e-14	G	A	0.083052	49
	rs703966	10	79194494	-0.003	0.002	0.2	A	G	0.41877	2.25
	rs7036107	9	89562982	-0.001	0.002	0.709999	G	A	0.510877	0.25
	rs6939861	6	41735303	0.001	0.002	0.54	A	G	0.261701	0.25
	rs6874202	5	156964617	0.032	0.002	1.6e-50	C	T	0.634269	256
	rs686030	9	15304784	0.011	0.003	0.000230001	A	C	0.858697	13.4444
	rs6824451	4	88801914	0.004	0.002	0.0790005	A	G	0.464077	4
	rs680321	18	32217995	0.002	0.002	0.24	C	T	0.456556	1
	rs6765484	3	50003880	0.004	0.002	0.0929994	T	C	0.472882	4
	rs6762415	3	133759713	-0.003	0.002	0.15	G	T	0.535176	2.25
	rs6732741	2	20894274	-0.028	0.003	2.9e-18	A	T	0.119324	87.1111
	rs6709904	2	43853185	-0.043	0.003	1.1e-39	G	A	0.112585	205.444
	rs6680227	1	109256292	-0.075	0.006	4.3e-40	A	G	0.035237	156.25
	rs6602912	13	113843576	0.022	0.002	7.2e-22	G	T	0.284854	121
	rs6544713	2	43846742	-0.054	0.002	5e-129	C	T	0.676864	729
	rs6475606	9	22081851	-0.02	0.002	2.3e-22	T	C	0.48447	100
	rs6469605	8	115589667	-0.006	0.002	0.0025	T	C	0.568577	9
	rs6460894	7	12207704	0.001	0.002	0.56	C	T	0.339014	0.25
	rs635769	6	139510844	-0.008	0.002	0.0004	C	T	0.628305	16
	rs62428831	6	142926024	0.001	0.003	0.780001	C	T	0.141337	0.111111
	rs62271373	3	150348753	-0.005	0.004	0.28	A	T	0.059974	1.5625
	rs62246443	3	47130917	0.005	0.003	0.0749998	C	T	0.17409	2.77778
	rs62102718	19	33400107	0	0.002	0.84	T	A	0.286208	0
	rs61884005	11	14381384	-0.003	0.003	0.36	G	C	0.121452	1
	rs61805075	1	182167266	0.011	0.002	2.6e-07	A	G	0.328888	30.25
	rs61754230	12	71785666	0.043	0.007	9.1e-09	T	C	0.019784	37.7347
	rs61748951	1	156068267	0.002	0.007	0.780001	A	C	0.024106	0.0816327
	rs61596977	8	94984937	-0.006	0.003	0.032	T	C	0.14044	4
	rs61435086	8	20052781	-0.013	0.009	0.17	C	T	0.012323	2.08642
	rs6142206	20	34624251	-0.005	0.002	0.016	A	G	0.420667	6.25
	rs61352607	12	57445390	-0.013	0.002	2.3e-07	T	G	0.240585	42.25
	rs6123685	20	57260984	0	0.002	0.93	A	G	0.254938	0
	rs6073958	20	45923216	0.017	0.003	3.2e-11	C	T	0.198676	32.1111
	rs6066148	20	46973398	-0.003	0.002	0.15	C	G	0.259774	2.25
	rs6059958	20	31555475	0.004	0.003	0.21	T	C	0.170881	1.77778
	rs6018652	20	47712230	-0.003	0.003	0.18	A	G	0.792981	1
	rs59781045	11	117224567	-0.008	0.004	0.0530005	T	C	0.067956	4
	rs59104589	2	241298487	-0.01	0.002	1.7e-06	T	C	0.358564	25
	rs58298943	12	56997508	-0.001	0.004	0.77	T	C	0.084268	0.0625
	rs58123204	12	53366378	0.009	0.003	0.00309999	G	A	0.153249	9
	rs564832	11	30396699	0.005	0.002	0.02	C	T	0.314951	6.25
	rs56130071	7	21559135	0.033	0.003	4.7e-39	C	G	0.216984	121
	rs559355	11	75740236	-0.004	0.003	0.15	T	A	0.157483	1.77778
	rs55714927	17	7176997	-0.026	0.003	2.4e-23	T	C	0.190364	75.1111
	rs55637835	1	55000630	-0.019	0.003	8.4e-09	T	C	0.120881	40.1111
	rs556107	1	234717312	0.035	0.002	1.2e-63	T	C	0.523338	306.25
	rs549058	13	50626909	0.003	0.003	0.28	T	G	0.120348	1
	rs4970834	1	109272258	-0.105	0.003	0	T	C	0.186642	1225
	rs4930352	11	66299522	-0.002	0.002	0.38	T	G	0.494102	1
	rs4875043	8	143414602	-0.001	0.003	0.64	C	A	0.216951	0.111111
	rs4871624	8	125617084	0.011	0.002	2.6e-06	G	T	0.286556	30.25
	rs4855582	3	109148858	0.001	0.002	0.49	T	C	0.429694	0.25
	rs4804101	19	7220734	-0.001	0.002	0.719999	T	G	0.438987	0.25
	rs4784709	16	56677463	0.014	0.005	0.00669993	A	T	0.959198	7.84
	rs472495	1	55055640	0.043	0.002	7.3e-85	T	G	0.648959	462.25
	rs4691379	4	156785752	0.001	0.002	0.64	T	C	0.318772	0.25
	rs4666384	2	20375251	-0.017	0.002	1.1e-13	G	A	0.678914	72.25
	rs4650994	1	178546177	-0.004	0.002	0.032	A	G	0.531667	4
	rs4614	11	119081661	-0.004	0.002	0.0560003	G	A	0.405982	4
	rs460428	22	29575000	-0.004	0.002	0.15	C	T	0.230672	4
	rs454968	5	112852759	-0.004	0.002	0.1	C	T	0.644822	4
	rs440677	19	11174714	-0.016	0.002	1.5e-13	A	G	0.623063	64
	rs429358	19	44908684	0.186	0.003	0	C	T	0.154296	3844
	rs4263041	19	44935386	-0.07	0.003	4.9e-171	G	A	0.283209	544.444
	rs42125	7	73409447	0.027	0.008	0.000369999	G	A	0.023195	11.3906
	rs4074448	15	63596296	0.003	0.002	0.21	A	G	0.589319	2.25
	rs407133	21	45151974	0.002	0.002	0.27	C	G	0.558829	1
	rs3924313	12	124843829	-0.001	0.002	0.79	A	G	0.322445	0.25
	rs3822855	6	115995719	0.018	0.002	4.5e-17	T	G	0.40166	81
	rs3814883	16	29983601	-0.002	0.002	0.26	T	C	0.482538	1
	rs3794752	17	55305468	0.002	0.002	0.37	C	T	0.280971	1
	rs3780181	9	2640759	-0.028	0.004	2.6e-11	G	A	0.067627	49
	rs3768321	1	39570256	-0.004	0.003	0.14	T	G	0.196392	1.77778
	rs3747973	1	205708020	0.003	0.002	0.18	G	A	0.5926	2.25
	rs3746915	21	42298682	-0.005	0.002	0.012	G	A	0.580677	6.25
	rs3732356	3	119810266	-0.025	0.004	6.7e-09	T	G	0.933674	39.0625
	rs367070	19	54296648	0.008	0.002	0.002	G	A	0.225746	16
	rs36057735	6	31352146	-0.015	0.003	6.2e-09	G	C	0.199012	25
	rs35882350	12	513963	0.014	0.002	4e-09	G	A	0.261067	49
	rs35511051	19	58154450	-0.022	0.003	1.1e-17	A	C	0.209985	53.7778
	rs35493868	7	73625076	-0.002	0.003	0.38	G	C	0.202116	0.444444
	rs34940374	7	150634289	0.007	0.003	0.00749998	A	G	0.183041	5.44444
	rs343	8	19953276	-0.012	0.004	0.00189998	A	C	0.083153	9
	rs34138141	17	42629543	0.006	0.002	0.00840001	T	G	0.280506	9
	rs34045894	10	33678561	0.002	0.003	0.53	A	G	0.156159	0.444444
	rs330089	8	9292102	0.017	0.004	8.8e-07	C	T	0.098234	18.0625
	rs3184504	12	111446804	0.027	0.002	2.3e-38	C	T	0.517203	182.25
	rs308	8	19959965	-0.022	0.007	0.00269998	G	T	0.020586	9.87755
	rs2943645	2	226234464	0	0.002	0.89	T	C	0.646632	0
	rs2925979	16	81501185	-0.004	0.002	0.1	C	T	0.699989	4
	rs2910949	5	39522379	0.009	0.002	1.9e-05	G	T	0.354777	20.25
	rs28615248	8	54538633	0.018	0.003	2.7e-12	C	T	0.196095	36
	rs28601761	8	125487789	-0.062	0.002	2.9e-185	G	C	0.418688	961
	rs28510484	15	31345366	-0.001	0.003	0.67	C	G	0.170482	0.111111
	rs28362901	15	74420596	-0.008	0.004	0.0340001	A	C	0.088473	4
	rs2814982	6	34578783	-0.02	0.003	9.9e-09	T	C	0.102153	44.4444
	rs2804894	10	33358163	0.001	0.002	0.709999	A	G	0.734751	0.25
	rs2800710	6	127131436	0.013	0.002	1.3e-09	C	T	0.518121	42.25
	rs2792751	10	112180571	-0.018	0.002	6.9e-15	C	T	0.72481	81
	rs2750411	6	138905493	-0.002	0.002	0.35	G	T	0.491855	1
	rs2740488	9	104899461	-0.025	0.002	1.3e-26	C	A	0.265466	156.25
	rs2738447	19	11116804	0.042	0.002	2.9e-89	C	A	0.592612	441
	rs2723065	2	65052280	0	0.002	0.9	G	A	0.376646	0
	rs267738	1	150968149	-0.007	0.003	0.00490004	G	T	0.219351	5.44444
	rs2645979	12	83623264	-0.001	0.002	0.7	A	G	0.357237	0.25
	rs2642438	1	220796686	0.025	0.002	8e-29	G	A	0.702657	156.25
	rs2618566	20	17864040	-0.025	0.002	9.6e-30	T	G	0.659861	156.25
	rs2586116	17	40349572	-0.004	0.002	0.11	G	C	0.259359	4
	rs254562	5	135105767	-0.002	0.002	0.31	G	A	0.409478	1
	rs2520096	9	134054294	0	0.002	0.88	G	A	0.270194	0
	rs2516331	1	212243647	0.002	0.002	0.39	A	C	0.375291	1
	rs2498786	14	104796031	-0.002	0.002	0.27	G	C	0.616182	1
	rs2435307	18	23547946	-0.006	0.002	0.00329997	T	C	0.486229	9
	rs2417125	9	128799953	-0.005	0.002	0.0269998	G	A	0.28405	6.25
	rs235314	21	44851537	0.001	0.002	0.5	T	C	0.532057	0.25
	rs2339234	5	171185542	-0.003	0.002	0.16	A	G	0.683227	2.25
	rs2302263	11	64254349	0.007	0.004	0.0599998	T	C	0.088863	3.0625
	rs2298632	1	23383982	0.004	0.002	0.0840001	T	C	0.497862	4
	rs2298624	18	49902652	0.008	0.003	0.00619998	T	C	0.132434	7.11111
	rs2298214	1	999842	-0.005	0.002	0.0259998	A	C	0.577173	6.25
	rs2297409	9	104813965	-0.006	0.003	0.0239999	A	G	0.194468	4
	rs2290866	8	104895605	0.002	0.002	0.51	T	C	0.253121	1
	rs2287622	2	168973818	-0.021	0.002	2.9e-23	G	A	0.602794	110.25
	rs2268840	3	186213385	0.002	0.002	0.44	C	T	0.228272	1
	rs2256609	22	21570728	-0.01	0.003	8.8e-05	G	A	0.189296	11.1111
	rs2247355	8	102864552	0.005	0.003	0.0790005	T	C	0.182785	2.77778
	rs2238162	13	32385062	-0.017	0.002	2.8e-15	T	C	0.522955	72.25
	rs2237035	4	54660085	-0.003	0.002	0.16	T	G	0.38595	2.25
	rs2236464	21	45478260	-0.002	0.003	0.41	C	T	0.212249	0.444444
	rs2159607	3	52467435	0.004	0.003	0.19	T	G	0.810944	1.77778
	rs2155220	11	76555128	-0.004	0.002	0.0389996	T	C	0.438259	4
	rs2098918	4	37149911	0	0.002	0.93	T	C	0.454941	0
	rs2098368	7	36229675	0.002	0.002	0.450001	T	C	0.546111	1
	rs2073547	7	44542732	0.036	0.003	2.3e-40	G	A	0.184007	144
	rs2068888	10	93079885	-0.019	0.002	4.6e-20	A	G	0.450695	90.25
	rs2066714	9	104824472	0.021	0.003	1.4e-11	C	T	0.128775	49
	rs201441	7	102094047	-0.001	0.002	0.77	G	T	0.580937	0.25
	rs1970811	10	125007927	-0.003	0.002	0.23	C	T	0.457454	2.25
	rs1955512	14	32706616	-0.001	0.002	0.649999	A	G	0.575679	0.25
	rs1862205	5	109320934	0.005	0.002	0.0129999	A	G	0.404998	6.25
	rs183906992	7	95382636	0.003	0.005	0.61	C	T	0.042729	0.36
	rs1771582	1	161644700	0.003	0.002	0.15	G	T	0.557269	2.25
	rs17713879	2	254215	0.003	0.002	0.17	A	G	0.364836	2.25
	rs1760940	14	20470092	0.007	0.002	0.00350002	C	A	0.247083	12.25
	rs174566	11	61824890	-0.032	0.002	3.8e-47	G	A	0.349716	256
	rs17309930	11	27726946	-0.004	0.003	0.12	A	C	0.205433	1.77778
	rs17138358	7	17880630	-0.005	0.002	0.016	C	G	0.398484	6.25
	rs17124112	14	88139165	-0.007	0.004	0.0749998	A	C	0.079894	3.0625
	rs17050272	2	120548864	-0.021	0.002	2.5e-22	A	G	0.409275	110.25
	rs16928809	11	2915722	-0.014	0.004	0.00016	A	G	0.093104	12.25
	rs1551891	19	44728555	-0.174	0.004	0	A	G	0.088107	1892.25
	rs150844304	15	43434427	0.004	0.007	0.53	C	A	0.025809	0.326531
	rs150474434	2	118087545	-0.035	0.003	1.3e-23	A	G	0.101353	136.111
	rs150237291	18	49254644	0.002	0.007	0.75	C	T	0.021789	0.0816327
	rs150224153	20	44380341	-0.033	0.006	1.9e-07	T	C	0.029674	30.25
	rs147772065	9	104970249	0.003	0.006	0.57	C	G	0.034842	0.25
	rs147627829	6	34367311	0.005	0.005	0.33	A	G	0.043719	1
	rs1471251	4	87055207	0.011	0.002	6.1e-07	T	A	0.398404	30.25
	rs146534110	6	160157037	0.068	0.009	7.8e-14	T	G	0.013304	57.0864
	rs145947882	17	43731839	-0.018	0.007	0.00649995	C	A	0.025948	6.61224
	rs145730801	14	94301859	0.036	0.005	3.3e-12	C	T	0.044378	51.84
	rs1446585	2	135649909	0.012	0.002	2.2e-07	G	A	0.244426	36
	rs144033177	20	590823	0.006	0.009	0.48	C	A	0.01583	0.444444
	rs1431659	8	72526835	-0.001	0.002	0.780001	G	A	0.728665	0.25
	rs143020224	19	11076648	-0.169	0.003	0	G	C	0.118603	3173.44
	rs142288236	8	19988101	0.027	0.009	0.0021	T	C	0.014662	9
	rs141469619	11	116843577	0.054	0.011	1.2e-06	G	A	0.009924	24.0992
	rs141440048	1	182359063	-0.005	0.008	0.52	T	C	0.017603	0.390625
	rs1412234	9	28410685	-0.007	0.002	0.00219999	C	T	0.327177	12.25
	rs1411432	9	16728534	0.002	0.003	0.57	C	A	0.186261	0.444444
	rs141062196	17	592087	-0.001	0.003	0.81	A	G	0.194167	0.111111
	rs140164052	16	57508330	-0.002	0.006	0.79	A	G	0.031806	0.111111
	rs140064750	8	20048645	0.002	0.007	0.73	C	T	0.024535	0.0816327
	rs1395221	4	24625280	-0.003	0.002	0.21	T	G	0.397663	2.25
	rs13389219	2	164672366	-0.011	0.002	1.2e-07	T	C	0.392502	30.25
	rs13379043	14	73783423	-0.012	0.002	7.8e-07	C	T	0.280482	36
	rs133015	22	38176519	-0.004	0.002	0.0790005	G	C	0.440087	4
	rs13269725	8	71547654	0.01	0.004	0.00949992	G	A	0.07844	6.25
	rs13235365	7	6416460	0.01	0.002	4.2e-05	T	C	0.273715	25
	rs13144151	4	145482013	-0.002	0.003	0.41	G	A	0.850118	0.444444
	rs13137144	4	973657	-0.004	0.002	0.0589997	A	G	0.461502	4
	rs13121616	4	7210662	0.013	0.002	1.3e-08	G	A	0.693553	42.25
	rs13111599	4	82995884	-0.005	0.002	0.0230001	G	A	0.737189	6.25
	rs13107325	4	102267552	-0.025	0.004	3.8e-10	T	C	0.074895	39.0625
	rs13087167	3	186160351	0.003	0.002	0.16	C	G	0.632913	2.25
	rs13076933	3	12285932	-0.021	0.002	1.6e-18	G	T	0.259454	110.25
	rs13066793	3	86988393	0.004	0.004	0.24	G	A	0.090085	1
	rs12986742	2	58748008	-0.003	0.002	0.22	C	T	0.476099	2.25
	rs12928099	16	15056648	0.005	0.002	0.0219999	A	C	0.296372	6.25
	rs12926854	16	85917652	-0.002	0.002	0.52	G	A	0.270106	1
	rs12916	5	75360714	0.062	0.002	1.7e-187	C	T	0.400537	961
	rs12781812	10	100131465	0.009	0.002	1.5e-05	T	G	0.400947	20.25
	rs12740811	1	171447117	-0.008	0.004	0.0290001	G	A	0.094155	4
	rs12705595	7	109463855	0.001	0.002	0.51	A	G	0.373493	0.25
	rs12686780	9	92620015	0.001	0.003	0.8	T	C	0.175009	0.111111
	rs1260326	2	27508073	-0.035	0.002	5.1e-60	C	T	0.604443	306.25
	rs12575456	11	47304522	-0.001	0.002	0.53	A	G	0.321786	0.25
	rs1250258	2	215435462	0.014	0.002	6e-09	T	C	0.736649	49
	rs12475332	2	226367331	-0.003	0.002	0.15	G	T	0.260971	2.25
	rs12445804	16	11612244	0.023	0.004	9.5e-09	A	G	0.074901	33.0625
	rs1229984	4	99318162	0.053	0.006	1e-16	C	T	0.972799	78.0278
	rs1225053	3	131924008	-0.005	0.002	0.0219999	C	T	0.264734	6.25
	rs12246352	10	122945791	0.026	0.003	6e-14	G	A	0.103895	75.1111
	rs12229011	12	124599168	0	0.004	0.99	T	C	0.097559	0
	rs12208357	6	160122116	0.057	0.004	5.4e-44	T	C	0.070102	203.063
	rs12205778	6	42947011	-0.008	0.002	0.0012	A	G	0.258723	16
	rs12162782	22	50415197	0.013	0.002	3.5e-09	G	T	0.344365	42.25
	rs12046972	1	219499801	0.003	0.002	0.18	C	T	0.563934	2.25
	rs1183851	1	62492987	0.024	0.002	4.5e-30	C	T	0.395544	144
	rs118039278	6	160564494	0.084	0.004	1.8e-102	A	G	0.078672	441
	rs117847213	11	111551181	-0.003	0.005	0.55	G	A	0.040835	0.36
	rs117762989	11	62836172	-0.003	0.005	0.51	T	C	0.043059	0.36
	rs117733303	6	160501838	0.084	0.008	2.4e-27	G	A	0.018422	110.25
	rs117291242	11	380315	0.016	0.006	0.005	T	C	0.036545	7.11111
	rs117230571	13	41114931	-0.017	0.004	1.7e-05	G	A	0.076987	18.0625
	rs116857878	16	57018671	-0.007	0.008	0.4	T	C	0.020366	0.765625
	rs116734477	5	52799190	-0.047	0.005	3.2e-19	T	C	0.040837	88.36
	rs11664369	18	60071840	-0.003	0.002	0.16	T	C	0.26711	2.25
	rs11640494	16	87996079	-0.007	0.002	0.0012	A	G	0.456949	12.25
	rs11631178	15	58422588	0.004	0.003	0.21	C	T	0.103855	1.77778
	rs11621792	14	24402720	0.019	0.002	1.1e-19	T	C	0.452867	90.25
	rs11591147	1	55039974	-0.348	0.008	0	T	G	0.017468	1892.25
	rs115458560	1	109519352	-0.05	0.008	6.4e-11	C	T	0.018563	39.0625
	rs114165349	1	26695422	0.056	0.007	6.2e-16	C	G	0.023172	64
	rs113966472	16	56411282	0.001	0.006	0.83	A	G	0.032436	0.0277778
	rs113740515	12	122714863	0	0.003	0.87	A	G	0.209517	0
	rs1132274	20	17615510	0.009	0.003	0.0025	A	C	0.153973	9
	rs1125873	9	104959142	-0.004	0.002	0.0420001	T	A	0.492278	4
	rs11254464	10	17223448	0.011	0.002	3.4e-07	C	T	0.422962	30.25
	rs11239536	10	45483150	0.008	0.002	0.000850002	A	T	0.240882	16
	rs112350227	2	160235122	-0.012	0.006	0.0530005	T	C	0.02763	4
	rs11218738	11	122654243	0.013	0.002	6.2e-08	A	G	0.249456	42.25
	rs112001035	17	68827664	0.023	0.004	2.5e-07	A	G	0.060426	33.0625
	rs11171710	12	55974294	-0.001	0.002	0.67	A	G	0.448125	0.25
	rs111363680	12	123682724	-0.007	0.006	0.28	T	C	0.03144	1.36111
	rs11045171	12	20317265	-0.002	0.003	0.5	G	A	0.197471	0.444444
	rs11021232	11	95587644	-0.003	0.003	0.25	C	T	0.181136	1
	rs11009262	10	33159836	0.008	0.004	0.0749998	T	G	0.057354	4
	rs10910476	1	234599210	0.012	0.002	3.7e-09	T	C	0.555163	36
	rs1083470	2	147113546	0.004	0.002	0.0580003	A	G	0.615608	4
	rs10786114	10	93549265	0.001	0.003	0.780001	T	C	0.874807	0.111111
	rs10774439	12	6622652	0.002	0.003	0.36	A	G	0.814746	0.444444
	rs10750766	11	65706327	-0.014	0.002	3.7e-09	A	C	0.709934	49
	rs1055582	4	39698553	0.002	0.002	0.31	T	C	0.505143	1
	rs10513801	3	186104564	-0.001	0.003	0.69	G	T	0.137077	0.111111
	rs10504477	8	70425950	-0.003	0.002	0.18	C	T	0.412377	2.25
	rs1047891	2	210675783	0.003	0.002	0.21	A	C	0.315697	2.25
	rs1045241	5	119393591	-0.001	0.002	0.57	T	C	0.270971	0.25
	rs10448340	9	136425617	-0.015	0.002	1.7e-11	G	T	0.319765	56.25
	rs10233430	7	1012028	-0.009	0.002	6.7e-06	C	T	0.426887	20.25
	rs10162642	15	58284964	-0.008	0.003	0.0012	A	G	0.211523	7.11111
	rs10119644	9	114367312	0.006	0.002	0.00430002	A	T	0.493788	9
	rs10108282	8	9863436	0.011	0.003	8.9e-06	A	T	0.205929	13.4444
	rs10053349	5	79179600	0.004	0.002	0.0769999	C	T	0.390341	4
	rs10031010	4	119114025	0.004	0.003	0.12	A	G	0.184531	1.77778
Model 2
HDL-C	rs9989419	16	56951227	0.144	0.002	0	G	A	0.605917	5184
	rs9987289	8	9325848	0.087	0.003	9.1e-155	G	A	0.908737	841
	rs998584	6	43790159	-0.034	0.002	1.1e-71	A	C	0.482733	289
	rs9977268	21	45487373	-0.016	0.002	7.4e-11	T	C	0.1987	64
	rs9933509	16	53784255	-0.014	0.002	2.4e-13	C	T	0.413899	49
	rs983663	18	22098576	-0.014	0.002	7.7e-11	G	A	0.251682	49
	rs976002	4	68477569	0.016	0.002	1e-12	G	A	0.245341	64
	rs968050	6	98126684	0.014	0.002	8.1e-13	T	C	0.48238	49
	rs9647335	3	136161568	0.028	0.002	2.4e-30	T	A	0.191928	196
	rs964184	11	116778201	0.105	0.003	1.59955999999979e-311	C	G	0.866364	1225
	rs9608972	22	30535320	-0.017	0.002	1.4e-14	C	T	0.24146	72.25
	rs9604045	13	113272893	0.018	0.002	2e-14	T	G	0.253572	81
	rs9465693	6	20312889	-0.012	0.002	6.2e-09	A	C	0.304872	36
	rs9426827	1	154617489	0.009	0.002	6.2e-06	C	T	0.47811	20.25
	rs9347737	6	163319290	-0.013	0.002	4.4e-12	G	A	0.428295	42.25
	rs921919	12	124780655	-0.042	0.002	1.4e-90	A	G	0.669162	441
	rs880674	4	2248382	0.015	0.003	4.4e-08	C	T	0.142056	25
	rs830620	3	71629997	0.015	0.002	9.6e-15	T	C	0.415386	56.25
	rs8086351	18	49645518	0.084	0.003	6.19e-246	G	C	0.824212	784
	rs8081548	17	7535517	0.018	0.002	6.9e-20	A	T	0.658521	81
	rs8028785	15	42838448	0.015	0.002	1.3e-09	C	T	0.182545	56.25
	rs80236739	15	58680500	-0.028	0.004	3.4e-10	G	A	0.049802	49
	rs8014289	14	74910649	0.015	0.002	4.6e-15	G	A	0.562282	56.25
	rs80005209	8	20014828	-0.144	0.006	2.5e-144	G	T	0.029614	576
	rs79634051	11	14540399	0.039	0.006	9e-12	C	G	0.028177	42.25
	rs79600951	16	56800342	-0.107	0.003	1.7e-235	G	C	0.092057	1272.11
	rs79506257	13	102901217	0.017	0.005	0.00021	A	G	0.047808	11.56
	rs79153732	8	19805426	-0.094	0.007	4.2e-38	T	C	0.017377	180.327
	rs78965095	18	49091501	0.036	0.007	1e-07	T	C	0.020298	26.449
	rs7853377	9	83937290	0.015	0.002	4.7e-11	G	A	0.216224	56.25
	rs7826177	8	34549022	0.011	0.002	1.4e-08	C	T	0.635428	30.25
	rs7817574	8	143220400	0.033	0.002	3.5e-42	C	T	0.185003	272.25
	rs78058190	2	218835276	-0.078	0.005	1.8e-57	A	G	0.050415	243.36
	rs77960347	18	49583585	0.291	0.008	4.2e-269	G	A	0.013349	1323.14
	rs7794796	7	150843108	-0.017	0.002	1.2e-16	T	C	0.332335	72.25
	rs77767539	20	46172917	0.045	0.008	3.6e-08	A	G	0.014299	31.6406
	rs77320712	3	153521088	-0.013	0.002	1.9e-08	T	G	0.235452	42.25
	rs7725218	5	1282299	-0.012	0.002	1.2e-09	A	G	0.338422	36
	rs771481	1	93381096	0.029	0.002	9.1e-32	A	T	0.18382	210.25
	rs76962725	1	224239431	-0.028	0.005	4.6e-08	A	G	0.037253	31.36
	rs76602912	20	58884813	-0.043	0.006	4e-12	C	T	0.023789	51.3611
	rs76428106	13	28029870	-0.062	0.009	1.2e-12	C	T	0.01297	47.4568
	rs76247316	3	160364496	-0.011	0.002	2.4e-09	C	T	0.479856	30.25
	rs7622114	3	36919169	0.012	0.002	2.5e-09	A	C	0.581017	36
	rs7583067	2	100180388	0.015	0.002	6.6e-11	T	C	0.240114	56.25
	rs75662196	8	20084145	0.068	0.006	6.7e-31	C	G	0.027941	128.444
	rs75609851	8	20013569	0.17	0.01	1.4e-69	A	G	0.010454	289
	rs75479205	6	7255377	0.014	0.002	1.2e-08	G	A	0.189496	49
	rs75406471	10	5215684	-0.014	0.003	1.1e-07	A	G	0.154193	21.7778
	rs75246752	1	145804971	0.049	0.008	5.4e-09	C	G	0.012897	37.5156
	rs75152587	16	56546049	-0.094	0.008	1.1e-28	T	G	0.012738	138.062
	rs7503353	17	8204661	-0.012	0.002	1.2e-10	T	G	0.531948	36
	rs75032664	8	19834914	-0.055	0.009	1.3e-09	G	C	0.012909	37.3457
	rs74500135	9	103841535	0.067	0.01	2.3e-11	C	T	0.009847	44.89
	rs73455693	18	60360263	0.028	0.005	3.9e-08	A	G	0.037231	31.36
	rs73243877	4	26045994	-0.025	0.003	2.5e-23	G	A	0.168086	69.4444
	rs73216701	3	109146446	0.011	0.002	7.6e-09	G	A	0.430022	30.25
	rs7304603	12	70720620	-0.011	0.002	2e-08	C	T	0.537671	30.25
	rs72926946	2	202613145	-0.021	0.002	3.1e-23	A	C	0.296376	110.25
	rs7281183	21	15039346	-0.013	0.002	6.3e-09	A	G	0.737142	42.25
	rs72761606	1	243577143	-0.013	0.003	2.6e-06	C	T	0.131364	18.7778
	rs72647336	8	125432813	-0.044	0.004	2.6e-23	A	G	0.056628	121
	rs7251640	19	18504125	0.014	0.002	5.1e-09	C	T	0.194019	49
	rs7218647	17	78773523	0.011	0.002	1.4e-08	A	G	0.559041	30.25
	rs7186799	16	57186104	-0.022	0.002	5.2e-31	C	A	0.437388	121
	rs7170463	15	41596720	0.019	0.002	4.2e-20	G	A	0.311432	90.25
	rs71647892	16	66963853	-0.063	0.009	5.2e-13	C	T	0.011842	49
	rs71603401	4	18032840	-0.015	0.003	3.2e-08	G	A	0.136851	25
	rs7147511	14	100328481	-0.009	0.002	1.9e-06	T	C	0.495469	20.25
	rs703966	10	79194494	0.016	0.002	4.9e-16	A	G	0.418881	64
	rs7036107	9	89562982	-0.012	0.002	2.9e-10	G	A	0.51098	36
	rs7032795	9	114372665	0.013	0.002	1.9e-12	C	T	0.4936	42.25
	rs686030	9	15304784	0.05	0.003	6.5e-74	A	C	0.858823	277.778
	rs6824451	4	88801914	-0.02	0.002	1e-25	A	G	0.464071	100
	rs681869	18	2981400	-0.01	0.002	1.5e-06	T	C	0.70421	25
	rs680321	18	32217995	0.011	0.002	1.5e-08	C	T	0.456556	30.25
	rs6765484	3	50003880	0.023	0.002	3.9e-32	T	C	0.472827	132.25
	rs6762415	3	133759713	-0.011	0.002	1.2e-08	G	T	0.535292	30.25
	rs676210	2	21008652	0.059	0.002	4.5e-140	A	G	0.205227	870.25
	rs6705285	2	66482336	0.012	0.002	1.9e-09	T	G	0.609068	36
	rs6505176	17	30334751	-0.013	0.002	7.4e-11	G	T	0.33147	42.25
	rs6469605	8	115589667	0.032	0.002	5.8e-61	T	C	0.568501	256
	rs6460894	7	12207704	-0.012	0.002	1.6e-09	C	T	0.339247	36
	rs635769	6	139510844	0.02	0.002	1.4e-23	C	T	0.628046	100
	rs62428831	6	142926024	0.018	0.003	1e-10	C	T	0.141547	36
	rs62405458	5	180798919	-0.013	0.002	8.7e-08	T	C	0.182638	42.25
	rs62369502	5	43815476	-0.018	0.004	9.8e-07	C	T	0.076466	20.25
	rs62271373	3	150348753	-0.041	0.004	2.5e-23	A	T	0.059972	105.063
	rs62246443	3	47130917	-0.015	0.003	3.8e-09	C	T	0.174261	25
	rs6224	15	90880313	0.01	0.002	1.5e-07	T	G	0.473666	25
	rs62117487	19	8359176	0.046	0.004	1.1e-28	G	A	0.057038	132.25
	rs62102718	19	33400107	-0.024	0.002	3.4e-29	T	A	0.286413	144
	rs61884005	11	14381384	0.016	0.003	2.4e-08	G	C	0.121445	28.4444
	rs61805075	1	182167266	-0.026	0.002	6e-37	A	G	0.328694	169
	rs61596977	8	94984937	-0.016	0.003	3.1e-09	T	C	0.140363	28.4444
	rs61435086	8	20052781	0.089	0.009	3.7e-25	C	T	0.012312	97.7901
	rs6142206	20	34624251	-0.016	0.002	8.3e-17	A	G	0.42072	64
	rs61352607	12	57445390	0.031	0.002	4.4e-43	T	G	0.240851	240.25
	rs6123685	20	57260984	0.016	0.002	3e-13	A	G	0.254745	64
	rs6075860	20	21929628	-0.013	0.002	3.1e-11	A	G	0.56549	42.25
	rs6057911	20	31473892	0.015	0.003	5.5e-08	G	C	0.13133	25
	rs6018652	20	47712230	0.026	0.002	4.6e-28	A	G	0.792888	169
	rs59781045	11	117224567	0.074	0.004	4.5e-85	T	C	0.068117	342.25
	rs59104589	2	241298487	0.015	0.002	3.5e-14	T	C	0.358286	56.25
	rs58298943	12	56997508	0.02	0.003	3.8e-09	T	C	0.084318	44.4444
	rs57274629	1	65644609	0.013	0.002	1.9e-11	G	A	0.357618	42.25
	rs564832	11	30396699	-0.012	0.002	1.2e-08	C	T	0.315005	36
	rs559355	11	75740236	-0.035	0.003	9e-41	T	A	0.1573	136.111
	rs55935382	7	50250073	0.018	0.002	4.9e-18	A	C	0.32503	81
	rs557933	1	234717521	0.015	0.002	1.3e-15	C	A	0.520349	56.25
	rs549058	13	50626909	0.017	0.003	5.7e-09	T	G	0.120319	32.1111
	rs4969141	17	78395572	0.03	0.002	3.2e-54	T	C	0.489676	225
	rs49675	8	9294178	0.021	0.003	7.1e-11	A	G	0.098073	49
	rs4930352	11	66299522	0.016	0.002	7.3e-17	T	G	0.494128	64
	rs4875043	8	143414602	-0.015	0.002	1.3e-10	C	A	0.216821	56.25
	rs4871624	8	125617084	-0.02	0.002	3.9e-22	G	T	0.286726	100
	rs4871603	8	125468125	0.036	0.002	5.2e-73	T	C	0.653471	324
	rs4795386	17	39590594	0.028	0.002	9.2e-38	G	A	0.723621	196
	rs4784709	16	56677463	-0.075	0.005	3e-55	A	T	0.959159	225
	rs4762756	12	20444643	0.013	0.002	6.5e-09	C	T	0.735634	42.25
	rs4691379	4	156785752	0.012	0.002	6.2e-09	T	C	0.318939	36
	rs4676609	3	39172765	0.006	0.002	0.015	T	C	0.196407	9
	rs4660586	1	41941558	0.009	0.002	1.5e-05	T	C	0.739226	20.25
	rs4650994	1	178546177	-0.018	0.002	2.1e-21	A	G	0.531842	81
	rs4614	11	119081661	-0.018	0.002	3.8e-20	G	A	0.406222	81
	rs460428	22	29575000	-0.014	0.002	2.5e-10	C	T	0.230673	49
	rs454968	5	112852759	0.011	0.002	3.2e-08	C	T	0.644812	30.25
	rs429358	19	44908684	-0.076	0.003	8.71e-181	C	T	0.154325	641.778
	rs42125	7	73409447	-0.04	0.007	1.3e-08	G	A	0.023208	32.6531
	rs41272086	6	160587614	-0.057	0.003	8.5e-75	A	G	0.105505	361
	rs407133	21	45151974	-0.011	0.002	4.6e-08	C	G	0.558791	30.25
	rs3924313	12	124843829	-0.024	0.002	1.6e-31	A	G	0.322221	144
	rs3828960	7	135509865	-0.012	0.002	2.4e-07	G	A	0.206508	36
	rs3818716	17	16948520	-0.009	0.002	2.3e-06	T	C	0.364497	20.25
	rs3814883	16	29983601	-0.015	0.002	5.9e-16	T	C	0.482467	56.25
	rs3802548	10	45457297	0.029	0.002	8.2e-38	A	T	0.240619	210.25
	rs3798233	6	115995929	0.016	0.002	7.9e-17	C	A	0.402044	64
	rs3794752	17	55305468	0.013	0.002	2e-09	C	T	0.280634	42.25
	rs3768321	1	39570256	-0.045	0.002	1.5e-79	T	G	0.196691	506.25
	rs3749748	5	128014857	0.017	0.002	8.2e-14	T	C	0.247265	72.25
	rs3747973	1	205708020	0.014	0.002	2.7e-13	G	A	0.592542	49
	rs3746915	21	42298682	0.011	0.002	2.1e-08	G	A	0.580939	30.25
	rs3745683	19	11237845	-0.055	0.004	3.2e-51	A	G	0.074638	189.062
	rs3732356	3	119810266	-0.03	0.004	1e-14	T	G	0.933782	56.25
	rs367070	19	54296648	0.042	0.002	1.3e-74	G	A	0.225571	441
	rs35909200	16	72122767	0.008	0.003	0.0017	G	T	0.157414	7.11111
	rs35745599	7	6411449	0.027	0.002	1e-32	T	C	0.238665	182.25
	rs35493868	7	73625076	0.037	0.002	3e-55	G	C	0.202024	342.25
	rs351862	5	177114369	0.015	0.003	9.5e-07	T	C	0.114506	25
	rs35135293	2	20163905	-0.017	0.002	3.6e-19	T	C	0.518748	72.25
	rs34940374	7	150634289	-0.017	0.002	5.3e-12	A	G	0.182973	72.25
	rs34642857	3	123332172	-0.012	0.002	1.7e-08	C	T	0.250581	36
	rs343	8	19953276	0.134	0.003	0	A	C	0.08307	1995.11
	rs34180494	15	75077671	-0.011	0.002	3.2e-07	C	A	0.273728	30.25
	rs34138141	17	42629543	-0.018	0.002	1.6e-16	T	G	0.280655	81
	rs34045894	10	33678561	-0.017	0.003	4.6e-11	A	G	0.15624	32.1111
	rs32578	5	149832305	0.013	0.002	1.1e-10	A	G	0.309015	42.25
	rs3184504	12	111446804	0.027	0.002	3.9e-44	C	T	0.517322	182.25
	rs308	8	19959965	0.127	0.007	1.1e-79	G	T	0.020639	329.163
	rs2965169	19	44747899	0.012	0.002	6.3e-10	C	A	0.388738	36
	rs2963468	5	158576012	-0.02	0.002	3.6e-18	G	A	0.235297	100
	rs2943645	2	226234464	-0.043	0.002	5.9e-106	T	C	0.646663	462.25
	rs2925979	16	81501185	0.037	0.002	1.6e-73	C	T	0.699999	342.25
	rs2910949	5	39522379	0.013	0.002	2e-11	G	T	0.354888	42.25
	rs28510484	15	31345366	-0.015	0.003	1.2e-09	C	G	0.170462	25
	rs28362901	15	74420596	-0.024	0.003	1.2e-12	A	C	0.088332	64
	rs2804894	10	33358163	0.017	0.002	2.3e-15	A	G	0.734831	72.25
	rs2803619	10	112174626	-0.036	0.002	6e-64	C	G	0.724583	324
	rs2800710	6	127131436	-0.02	0.002	1.8e-26	C	T	0.51821	100
	rs2750411	6	138905493	-0.011	0.002	1.4e-08	G	T	0.4919	30.25
	rs2740488	9	104899461	-0.069	0.002	2.6e-221	C	A	0.265328	1190.25
	rs2723065	2	65052280	0.015	0.002	2.4e-14	G	A	0.376773	56.25
	rs267738	1	150968149	0.021	0.002	9.9e-21	G	T	0.219354	110.25
	rs2645979	12	83623264	0.011	0.002	8.7e-09	A	G	0.357369	30.25
	rs2642438	1	220796686	0.028	0.002	2.1e-40	G	A	0.702698	196
	rs2586116	17	40349572	-0.016	0.002	7.1e-14	G	C	0.259435	64
	rs254559	5	135109292	-0.011	0.002	3.5e-09	A	C	0.404831	30.25
	rs2544654	5	73592455	0.01	0.002	7.5e-07	T	G	0.715235	25
	rs2520096	9	134054294	0.015	0.002	7.7e-12	G	A	0.270192	56.25
	rs2516331	1	212243647	0.013	0.002	1.1e-10	A	C	0.375524	42.25
	rs2494747	14	104792100	-0.025	0.002	5.7e-38	T	G	0.61559	156.25
	rs2435307	18	23547946	0.016	0.002	1.5e-17	T	C	0.48634	64
	rs2419605	10	112218339	-0.03	0.003	8.7e-29	G	A	0.147744	100
	rs2417125	9	128799953	-0.013	0.002	5.2e-10	G	A	0.284014	42.25
	rs2395158	6	32406818	-0.028	0.003	1.2e-28	G	A	0.169278	87.1111
	rs2364723	2	177261818	0.012	0.002	3.4e-09	C	G	0.319156	36
	rs2362541	2	30255587	-0.011	0.002	1.1e-08	G	T	0.507519	30.25
	rs235314	21	44851537	-0.018	0.002	2.4e-20	T	C	0.532212	81
	rs2307111	5	75707853	0.019	0.002	2.1e-22	C	T	0.394924	90.25
	rs2302263	11	64254349	-0.036	0.003	1.6e-27	T	C	0.088695	144
	rs2298632	1	23383982	0.014	0.002	9.7e-14	T	C	0.498073	49
	rs2298624	18	49902652	0.03	0.003	1.1e-26	T	C	0.132532	100
	rs2298214	1	999842	-0.012	0.002	1.6e-10	A	C	0.577365	36
	rs2297409	9	104813965	-0.033	0.002	1e-43	A	G	0.194635	272.25
	rs2294915	22	43945024	-0.012	0.002	3.8e-08	T	C	0.231686	36
	rs2290866	8	104895605	-0.012	0.002	4.6e-08	T	C	0.253153	36
	rs2268840	3	186213385	0.017	0.002	2.2e-14	C	T	0.22846	72.25
	rs2256609	22	21570728	-0.033	0.002	2.2e-41	G	A	0.189238	272.25
	rs2247355	8	102864552	0.021	0.002	5.1e-17	T	C	0.182679	110.25
	rs2245095	10	121098082	-0.017	0.003	8.4e-07	T	C	0.088819	32.1111
	rs2237035	4	54660085	0.014	0.002	1.2e-12	T	G	0.385886	49
	rs2196808	2	111081444	0.013	0.002	2.5e-09	C	T	0.731961	42.25
	rs2159607	3	52467435	-0.024	0.002	7.2e-23	T	G	0.810874	144
	rs2155220	11	76555128	-0.011	0.002	3.8e-08	T	C	0.437951	30.25
	rs2098918	4	37149911	0.012	0.002	5.8e-10	T	C	0.45513	36
	rs2098368	7	36229675	-0.012	0.002	1.8e-09	T	C	0.54591	36
	rs2071379	17	28368811	-0.014	0.002	3.3e-12	G	A	0.595143	49
	rs2068888	10	93079885	0.019	0.002	1.3e-23	A	G	0.450441	90.25
	rs2066714	9	104824472	0.047	0.003	3.4e-60	C	T	0.128622	245.444
	rs201441	7	102094047	-0.011	0.002	1.4e-08	G	T	0.580679	30.25
	rs1970811	10	125007927	-0.012	0.002	1.4e-09	C	T	0.457743	36
	rs188502504	5	131785472	-0.032	0.005	5.6e-10	C	T	0.03643	40.96
	rs1862205	5	109320934	0.011	0.002	5.8e-09	A	G	0.404725	30.25
	rs183906992	7	95382636	0.029	0.005	5.5e-10	C	T	0.04275	33.64
	rs1800961	20	44413724	-0.139	0.006	1.5e-140	T	C	0.031001	536.694
	rs1789896	4	99335827	0.012	0.002	1.5e-09	A	G	0.5136	36
	rs17713879	2	254215	0.014	0.002	2e-12	A	G	0.364695	49
	rs174566	11	61824890	-0.056	0.002	1.2e-174	G	A	0.350061	784
	rs17326656	2	48735152	-0.022	0.002	1.5e-23	T	G	0.238666	121
	rs17309930	11	27726946	-0.022	0.002	1.5e-20	A	C	0.205132	121
	rs17138358	7	17880630	-0.027	0.002	2.2e-44	C	G	0.398392	182.25
	rs17124112	14	88139165	-0.021	0.004	3.8e-09	A	C	0.07993	27.5625
	rs1661052	11	2921363	0.026	0.003	4.7e-15	A	G	0.90852	75.1111
	rs1601933	15	58379360	-0.071	0.002	2.4e-293	T	C	0.466403	1260.25
	rs1534696	7	26357619	0.017	0.002	2.9e-18	A	C	0.540992	72.25
	rs150844304	15	43434427	-0.091	0.006	1.4e-51	C	A	0.025907	230.028
	rs150483923	7	107316716	0.017	0.002	9.6e-14	A	C	0.225962	72.25
	rs150237291	18	49254644	0.045	0.007	5.1e-12	C	T	0.021799	41.3265
	rs148827772	4	109844908	-0.038	0.007	3.1e-08	G	A	0.02259	29.4694
	rs147772065	9	104970249	0.029	0.005	4.1e-08	C	G	0.034794	33.64
	rs1471251	4	87055207	-0.019	0.002	3.6e-23	T	A	0.398159	90.25
	rs145947882	17	43731839	-0.165	0.006	4.7e-161	C	A	0.026042	756.25
	rs1446585	2	135649909	0.017	0.002	1.1e-14	G	A	0.244295	72.25
	rs144475339	16	56128773	0.053	0.01	1.6e-07	C	G	0.010556	28.09
	rs144311893	19	44920687	0.081	0.007	1.1e-33	T	C	0.022086	133.898
	rs144033177	20	590823	-0.056	0.008	1.4e-12	C	A	0.015822	49
	rs1431659	8	72526835	0.013	0.002	2.3e-09	G	A	0.728463	42.25
	rs142288236	8	19988101	-0.078	0.008	1.6e-22	T	C	0.01469	95.0625
	rs141469619	11	116843577	-0.203	0.01	8.7e-89	G	A	0.009879	412.09
	rs141440048	1	182359063	0.044	0.008	7.8e-09	T	C	0.017665	30.25
	rs1412234	9	28410685	-0.012	0.002	3.9e-09	C	T	0.327133	36
	rs1411432	9	16728534	-0.014	0.002	1.3e-08	C	A	0.186415	49
	rs141062196	17	592087	-0.019	0.002	5.2e-15	A	G	0.194436	90.25
	rs140164052	16	57508330	-0.042	0.005	1.2e-14	A	G	0.031786	70.56
	rs140064750	8	20048645	-0.044	0.006	3.7e-12	C	T	0.024546	53.7778
	rs1395221	4	24625280	-0.011	0.002	1e-08	T	G	0.397646	30.25
	rs1349852	4	68667499	0.011	0.002	5.8e-09	C	A	0.475293	30.25
	rs13389219	2	164672366	0.028	0.002	4.5e-46	T	C	0.392619	196
	rs13379043	14	73783423	0.02	0.002	4.7e-20	C	T	0.28042	100
	rs133015	22	38176519	0.021	0.002	1.2e-26	G	C	0.440063	110.25
	rs13269725	8	71547654	-0.026	0.004	1.9e-13	G	A	0.078342	42.25
	rs1318175	15	58293930	-0.066	0.003	1.3e-140	T	C	0.15987	484
	rs13144151	4	145482013	0.018	0.003	3.8e-11	G	A	0.850001	36
	rs13137144	4	973657	0.016	0.002	1.5e-17	A	G	0.461454	64
	rs13111599	4	82995884	0.013	0.002	3.5e-09	G	A	0.737196	42.25
	rs13107325	4	102267552	-0.08	0.004	7e-109	T	C	0.074942	400
	rs13087167	3	186160351	0.017	0.002	2.9e-17	C	G	0.632997	72.25
	rs13066793	3	86988393	0.022	0.003	3.3e-11	G	A	0.090115	53.7778
	rs12998038	2	42375247	0.013	0.002	1.6e-09	T	C	0.258702	42.25
	rs12987470	2	187458584	0.011	0.002	2.2e-07	T	A	0.294664	30.25
	rs12986742	2	58748008	-0.011	0.002	3e-08	C	T	0.475905	30.25
	rs12943517	17	4180628	-0.01	0.002	2.1e-06	A	G	0.310721	25
	rs12928099	16	15056648	0.021	0.002	3.7e-25	A	C	0.29612	110.25
	rs12926854	16	85917652	0.012	0.002	9.5e-09	G	A	0.269909	36
	rs12898210	15	58347511	-0.04	0.003	1.9e-43	G	T	0.121527	177.778
	rs1281959	6	153136413	0.015	0.002	1.5e-14	G	C	0.525716	56.25
	rs12740374	1	109274968	0.029	0.002	2.2e-36	T	G	0.221008	210.25
	rs12705595	7	109463855	0.011	0.002	2.5e-08	A	G	0.37337	30.25
	rs12686780	9	92620015	-0.016	0.003	1.2e-10	T	C	0.174998	28.4444
	rs1260326	2	27508073	0.005	0.002	0.0179999	C	T	0.604623	6.25
	rs12575456	11	47304522	0.045	0.002	1.4e-106	A	G	0.321829	506.25
	rs12475332	2	226367331	0.013	0.002	2.5e-09	G	T	0.261038	42.25
	rs12462109	19	51840243	-0.016	0.002	3.8e-14	T	C	0.287067	64
	rs12436555	14	24165616	-0.012	0.003	1.7e-06	A	G	0.173169	16
	rs1240820	6	16824906	0.013	0.002	3.5e-10	A	G	0.293164	42.25
	rs1225053	3	131924008	-0.015	0.002	3.9e-12	C	T	0.264492	56.25
	rs12229011	12	124599168	-0.026	0.003	7.8e-16	T	C	0.097467	75.1111
	rs12205778	6	42947011	0.016	0.002	8.6e-14	A	G	0.258895	64
	rs12046972	1	219499801	-0.015	0.002	1e-14	C	T	0.564083	56.25
	rs117847213	11	111551181	0.03	0.005	1.2e-09	G	A	0.040812	36
	rs117762989	11	62836172	-0.027	0.005	9.3e-09	T	C	0.043022	29.16
	rs117399007	15	58972800	-0.021	0.005	1.3e-05	T	C	0.043443	17.64
	rs117291242	11	380315	-0.032	0.005	4.5e-10	T	C	0.036567	40.96
	rs117230571	13	41114931	-0.027	0.004	2.2e-13	G	A	0.076958	45.5625
	rs11688682	2	120590036	0.015	0.002	2.8e-11	C	G	0.270836	56.25
	rs116857878	16	57018671	0.048	0.007	4.5e-12	T	C	0.020363	47.0204
	rs116843064	19	8364439	0.206	0.007	3.4e-195	A	G	0.019327	866.041
	rs1168124	1	62674059	0.015	0.002	1.7e-14	T	C	0.650794	56.25
	rs11664369	18	60071840	-0.023	0.002	1.8e-26	T	C	0.267061	132.25
	rs11640494	16	87996079	-0.015	0.002	6.5e-16	A	G	0.456655	56.25
	rs11632618	15	58432507	0.094	0.004	3.5e-139	A	G	0.069771	552.25
	rs116006942	5	54109484	-0.03	0.004	1.3e-13	A	G	0.060798	56.25
	rs114165349	1	26695422	-0.081	0.006	3.9e-37	C	G	0.023124	182.25
	rs113966472	16	56411282	0.032	0.006	4.8e-09	A	G	0.032408	28.4444
	rs113740515	12	122714863	0.038	0.002	1.2e-58	A	G	0.209452	361
	rs1132274	20	17615510	-0.022	0.003	1.6e-16	A	C	0.154029	53.7778
	rs1125873	9	104959142	0.016	0.002	9.6e-17	T	A	0.492135	64
	rs11254464	10	17223448	0.013	0.002	3.9e-11	C	T	0.423107	42.25
	rs112350227	2	160235122	-0.032	0.006	4.1e-08	T	C	0.02764	28.4444
	rs11218738	11	122654243	0.023	0.002	1.4e-26	A	G	0.249489	132.25
	rs112001035	17	68827664	-0.047	0.004	3.3e-30	A	G	0.060492	138.062
	rs111849006	14	52115175	0.013	0.003	3.7e-07	A	G	0.181173	18.7778
	rs11171710	12	55974294	-0.011	0.002	2.8e-09	A	G	0.44814	30.25
	rs111363680	12	123682724	0.033	0.006	3.1e-08	T	C	0.031354	30.25
	rs11045171	12	20317265	0.028	0.002	4.3e-32	G	A	0.197605	196
	rs11021232	11	95587644	-0.017	0.002	1.7e-11	C	T	0.18096	72.25
	rs11009262	10	33159836	-0.023	0.004	1.2e-08	T	G	0.057318	33.0625
	rs10883451	10	100164661	0.015	0.002	9.9e-15	C	T	0.496297	56.25
	rs10876447	12	53377157	-0.018	0.003	3.3e-12	A	G	0.154079	36
	rs1083470	2	147113546	0.012	0.002	3.4e-09	A	G	0.615717	36
	rs10774439	12	6622652	0.021	0.002	1.4e-16	A	G	0.814891	110.25
	rs10750766	11	65706327	-0.019	0.002	9.2e-19	A	C	0.709866	90.25
	rs10748165	12	70978610	0.009	0.002	3.3e-06	T	C	0.504135	20.25
	rs1055582	4	39698553	0.014	0.002	2.1e-13	T	C	0.505231	49
	rs10513801	3	186104564	-0.03	0.003	6.7e-28	G	T	0.137151	100
	rs10504477	8	70425950	-0.015	0.002	6.1e-15	C	T	0.412192	56.25
	rs1047891	2	210675783	-0.019	0.002	2.2e-20	A	C	0.315582	90.25
	rs1037117	15	101528455	0.008	0.002	0.000109999	A	G	0.254809	16
	rs10271082	7	1041926	-0.019	0.002	4.7e-22	C	G	0.407729	90.25
	rs10170658	2	237791327	-0.01	0.002	5.7e-06	T	G	0.2229	25
	rs10108282	8	9863436	0.017	0.002	6.3e-13	A	T	0.205724	72.25
	rs10053349	5	79179600	0.012	0.002	7.9e-10	C	T	0.390258	36
	rs10023962	4	177038357	0.011	0.002	3.7e-06	G	T	0.816773	30.25
apoA-I	rs9989419	16	56951227	0.115	0.002	1e-200	G	A	0.60551	3306.25
	rs9987289	8	9325848	0.085	0.003	1e-138	G	A	0.908733	802.778
	rs998584	6	43790159	-0.024	0.002	3e-34	A	C	0.482734	144
	rs9977268	21	45487373	-0.018	0.002	1.5e-13	T	C	0.19875	81
	rs9933509	16	53784255	-0.01	0.002	1.5e-06	C	T	0.413835	25
	rs983663	18	22098576	-0.017	0.002	1.8e-14	G	A	0.251756	72.25
	rs976002	4	68477569	0.023	0.002	4.4e-24	G	A	0.24529	132.25
	rs968050	6	98126684	0.01	0.002	1.5e-07	T	C	0.48235	25
	rs9647335	3	136161568	0.032	0.002	8.6e-37	T	A	0.191878	256
	rs964184	11	116778201	0.019	0.003	2.6e-11	C	G	0.866303	40.1111
	rs9608972	22	30535320	-0.017	0.002	2.8e-14	C	T	0.241455	72.25
	rs9604045	13	113272893	0.015	0.002	5.8e-11	T	G	0.253532	56.25
	rs9465693	6	20312889	-0.01	0.002	1.4e-06	A	C	0.304869	25
	rs9426827	1	154617489	0.017	0.002	2.8e-18	C	T	0.478096	72.25
	rs9347737	6	163319290	-0.011	0.002	2.9e-08	G	A	0.428349	30.25
	rs921919	12	124780655	-0.037	0.002	2.5e-68	A	G	0.669251	342.25
	rs880674	4	2248382	0.013	0.003	1.9e-06	C	T	0.142041	18.7778
	rs830620	3	71629997	0.012	0.002	2e-09	T	C	0.415386	36
	rs8086351	18	49645518	0.096	0.003	1e-200	G	C	0.824039	1024
	rs8081548	17	7535517	0.014	0.002	8.1e-12	A	T	0.658526	49
	rs8028785	15	42838448	0.015	0.003	7.7e-09	C	T	0.18254	25
	rs80236739	15	58680500	-0.032	0.005	8.2e-13	G	A	0.049836	40.96
	rs8014289	14	74910649	0.014	0.002	6e-12	G	A	0.562184	49
	rs80005209	8	20014828	-0.111	0.006	1.4e-81	G	T	0.029685	342.25
	rs79634051	11	14540399	0.031	0.006	1.5e-07	C	G	0.028182	26.6944
	rs79600951	16	56800342	-0.086	0.003	4.2e-142	G	C	0.092201	821.778
	rs79506257	13	102901217	0.028	0.005	1.2e-09	A	G	0.047786	31.36
	rs79153732	8	19805426	-0.079	0.008	3.7e-26	T	C	0.0174	97.5156
	rs78965095	18	49091501	0.044	0.007	3.5e-10	T	C	0.02028	39.5102
	rs7853377	9	83937290	0.011	0.002	7.4e-06	G	A	0.216163	30.25
	rs7826177	8	34549022	0.01	0.002	2.7e-06	C	T	0.635339	25
	rs7817574	8	143220400	0.036	0.003	7.4e-47	C	T	0.184902	144
	rs78058190	2	218835276	-0.066	0.005	2.6e-39	A	G	0.050441	174.24
	rs77960347	18	49583585	0.336	0.009	1e-200	G	A	0.01329	1393.78
	rs7794796	7	150843108	-0.016	0.002	7.7e-14	T	C	0.33241	64
	rs77767539	20	46172917	0.022	0.008	0.00990011	A	G	0.014307	7.5625
	rs77320712	3	153521088	-0.011	0.002	4.6e-06	T	G	0.235403	30.25
	rs7725218	5	1282299	-0.008	0.002	8.1e-05	A	G	0.338421	16
	rs771481	1	93381096	0.025	0.003	2.8e-22	A	T	0.18377	69.4444
	rs76962725	1	224239431	-0.03	0.005	1.3e-08	A	G	0.037263	36
	rs76602912	20	58884813	-0.033	0.006	2.6e-07	C	T	0.023801	30.25
	rs76428106	13	28029870	-0.061	0.009	1.3e-11	C	T	0.012974	45.9383
	rs76247316	3	160364496	-0.012	0.002	4.7e-09	C	T	0.479843	36
	rs7622114	3	36919169	0.01	0.002	6.8e-07	A	C	0.581011	25
	rs7583067	2	100180388	0.014	0.002	8.3e-10	T	C	0.240022	49
	rs75662196	8	20084145	0.057	0.006	6.5e-21	C	G	0.027953	90.25
	rs75609851	8	20013569	0.125	0.01	4.2e-36	A	G	0.010448	156.25
	rs75479205	6	7255377	0.013	0.003	4.8e-07	G	A	0.189473	18.7778
	rs75406471	10	5215684	-0.025	0.003	1.3e-19	A	G	0.154253	69.4444
	rs75246752	1	145804971	0.05	0.009	1e-08	C	G	0.012875	30.8642
	rs75152587	16	56546049	-0.08	0.009	1.2e-19	T	G	0.012759	79.0123
	rs7503353	17	8204661	-0.014	0.002	7.3e-12	T	G	0.532015	49
	rs75032664	8	19834914	-0.045	0.009	1.2e-06	G	C	0.012907	25
	rs74500135	9	103841535	0.074	0.01	1.1e-12	C	T	0.009827	54.76
	rs73455693	18	60360263	0.026	0.005	7.3e-07	A	G	0.037188	27.04
	rs73243877	4	26045994	-0.021	0.003	3.4e-16	G	A	0.168184	49
	rs73216701	3	109146446	0.016	0.002	9.4e-17	G	A	0.429931	64
	rs7304603	12	70720620	-0.013	0.002	1.1e-10	C	T	0.537686	42.25
	rs72926946	2	202613145	-0.015	0.002	6.2e-13	A	C	0.296458	56.25
	rs7281183	21	15039346	-0.012	0.002	1.6e-07	A	G	0.737257	36
	rs72761606	1	243577143	-0.016	0.003	2.8e-08	C	T	0.131378	28.4444
	rs72647336	8	125432813	-0.025	0.005	5.2e-08	A	G	0.056631	25
	rs7251640	19	18504125	0.015	0.002	1.3e-09	C	T	0.194006	56.25
	rs7218647	17	78773523	0.008	0.002	2e-05	A	G	0.559032	16
	rs7186799	16	57186104	-0.019	0.002	4e-21	C	A	0.437522	90.25
	rs7170463	15	41596720	0.016	0.002	2.2e-14	G	A	0.311339	64
	rs71647892	16	66963853	-0.064	0.009	9.4e-13	C	T	0.011845	50.5679
	rs71603401	4	18032840	-0.011	0.003	9e-05	G	A	0.13686	13.4444
	rs7147511	14	100328481	-0.015	0.002	1.5e-13	T	C	0.495499	56.25
	rs703966	10	79194494	0.016	0.002	2.4e-15	A	G	0.418817	64
	rs7036107	9	89562982	-0.011	0.002	1.8e-08	G	A	0.511088	30.25
	rs7032795	9	114372665	0.015	0.002	1.3e-13	C	T	0.493507	56.25
	rs686030	9	15304784	0.056	0.003	4.7e-89	A	C	0.858646	348.444
	rs6824451	4	88801914	-0.013	0.002	1.3e-11	A	G	0.464058	42.25
	rs681869	18	2981400	-0.017	0.002	1.5e-14	T	C	0.704152	72.25
	rs680321	18	32217995	0.008	0.002	2.8e-05	C	T	0.456564	16
	rs6765484	3	50003880	0.02	0.002	2.5e-25	T	C	0.472703	100
	rs6762415	3	133759713	-0.009	0.002	3e-06	G	T	0.535268	20.25
	rs676210	2	21008652	0.06	0.002	8.71e-136	A	G	0.205092	900
	rs6705285	2	66482336	0.011	0.002	1.7e-08	T	G	0.609051	30.25
	rs6505176	17	30334751	-0.017	0.002	8.6e-17	G	T	0.331623	72.25
	rs6469605	8	115589667	0.035	0.002	1e-69	T	C	0.568386	306.25
	rs6460894	7	12207704	-0.01	0.002	1.4e-06	C	T	0.339337	25
	rs635769	6	139510844	0.015	0.002	7.7e-14	C	T	0.628022	56.25
	rs62428831	6	142926024	0.012	0.003	3.9e-05	C	T	0.141545	16
	rs62405458	5	180798919	-0.015	0.003	6.5e-09	T	C	0.18267	25
	rs62369502	5	43815476	-0.021	0.004	6.8e-09	C	T	0.076477	27.5625
	rs62271373	3	150348753	-0.027	0.004	1.2e-10	A	T	0.060005	45.5625
	rs62246443	3	47130917	-0.014	0.003	1.1e-07	C	T	0.174242	21.7778
	rs6224	15	90880313	0.013	0.002	1.8e-10	T	G	0.473585	42.25
	rs62117487	19	8359176	0.037	0.004	5.3e-18	G	A	0.05701	85.5625
	rs62102718	19	33400107	-0.024	0.002	2.6e-27	T	A	0.286492	144
	rs61884005	11	14381384	0.013	0.003	7.9e-06	G	C	0.121443	18.7778
	rs61805075	1	182167266	-0.015	0.002	5e-13	A	G	0.328795	56.25
	rs61596977	8	94984937	-0.016	0.003	3.8e-08	T	C	0.140376	28.4444
	rs61435086	8	20052781	0.069	0.009	8.7e-15	C	T	0.012278	58.7778
	rs6142206	20	34624251	-0.014	0.002	1.3e-12	A	G	0.420835	49
	rs61352607	12	57445390	0.028	0.002	1.1e-33	T	G	0.240776	196
	rs6123685	20	57260984	0.016	0.002	1.5e-12	A	G	0.254733	64
	rs6075860	20	21929628	-0.011	0.002	3.9e-08	A	G	0.565605	30.25
	rs6057911	20	31473892	0.019	0.003	2e-10	G	C	0.131284	40.1111
	rs6018652	20	47712230	0.026	0.002	4e-27	A	G	0.7928	169
	rs59781045	11	117224567	0.104	0.004	1.7e-157	T	C	0.068006	676
	rs59104589	2	241298487	0.017	0.002	7.6e-17	T	C	0.358199	72.25
	rs58298943	12	56997508	0.018	0.004	6.8e-07	T	C	0.084277	20.25
	rs57274629	1	65644609	0.015	0.002	3.3e-13	G	A	0.35757	56.25
	rs564832	11	30396699	-0.009	0.002	1.7e-05	C	T	0.314979	20.25
	rs559355	11	75740236	-0.045	0.003	8.8e-62	T	A	0.157349	225
	rs55935382	7	50250073	0.017	0.002	8.7e-16	A	C	0.32496	72.25
	rs557933	1	234717521	0.019	0.002	3.2e-22	C	A	0.520257	90.25
	rs549058	13	50626909	0.013	0.003	1.1e-05	T	G	0.120308	18.7778
	rs4969141	17	78395572	0.029	0.002	8.5e-48	T	C	0.489523	210.25
	rs49675	8	9294178	0.021	0.003	1.3e-10	A	G	0.09805	49
	rs4930352	11	66299522	0.017	0.002	5.3e-17	T	G	0.494116	72.25
	rs4875043	8	143414602	-0.015	0.002	2.9e-10	C	A	0.216842	56.25
	rs4871624	8	125617084	-0.014	0.002	3.5e-10	G	T	0.28676	49
	rs4871603	8	125468125	0.016	0.002	4.2e-15	T	C	0.653304	64
	rs4795386	17	39590594	0.026	0.002	5.1e-31	G	A	0.723594	169
	rs4784709	16	56677463	-0.062	0.005	7.4e-36	A	T	0.959184	153.76
	rs4762756	12	20444643	0.014	0.002	4.6e-10	C	T	0.73563	49
	rs4691379	4	156785752	0.01	0.002	1.6e-06	T	C	0.318946	25
	rs4676609	3	39172765	0.015	0.002	1.6e-09	T	C	0.196448	56.25
	rs4660586	1	41941558	0.013	0.002	1.8e-08	T	C	0.73925	42.25
	rs4650994	1	178546177	-0.015	0.002	6.5e-15	A	G	0.531912	56.25
	rs4614	11	119081661	-0.017	0.002	3.2e-18	G	A	0.406322	72.25
	rs460428	22	29575000	-0.015	0.002	4.5e-10	C	T	0.230636	56.25
	rs454968	5	112852759	0.011	0.002	5.6e-08	C	T	0.644846	30.25
	rs429358	19	44908684	-0.103	0.003	1e-200	C	T	0.154478	1178.78
	rs42125	7	73409447	-0.018	0.007	0.015	G	A	0.02321	6.61224
	rs41272086	6	160587614	-0.037	0.003	1.4e-31	A	G	0.105579	152.111
	rs407133	21	45151974	-0.009	0.002	1.3e-05	C	G	0.558847	20.25
	rs3924313	12	124843829	-0.022	0.002	8.4e-26	A	G	0.322273	121
	rs3828960	7	135509865	-0.015	0.002	1.7e-09	G	A	0.206522	56.25
	rs3818716	17	16948520	-0.013	0.002	5.2e-10	T	C	0.364549	42.25
	rs3814883	16	29983601	-0.013	0.002	7.1e-11	T	C	0.482536	42.25
	rs3802548	10	45457297	0.034	0.002	9.4e-50	A	T	0.240427	289
	rs3798233	6	115995929	0.018	0.002	2.3e-19	C	A	0.402016	81
	rs3794752	17	55305468	0.01	0.002	2.4e-06	C	T	0.280521	25
	rs3768321	1	39570256	-0.042	0.002	6.2e-66	T	G	0.196773	441
	rs3749748	5	128014857	0.022	0.002	4.3e-22	T	C	0.247259	121
	rs3747973	1	205708020	0.015	0.002	9.9e-14	G	A	0.592553	56.25
	rs3746915	21	42298682	0.009	0.002	7.3e-06	G	A	0.580922	20.25
	rs3745683	19	11237845	-0.06	0.004	9.6e-58	A	G	0.074672	225
	rs3732356	3	119810266	-0.037	0.004	2.7e-20	T	G	0.93378	85.5625
	rs367070	19	54296648	0.039	0.002	8.4e-62	G	A	0.225382	380.25
	rs35909200	16	72122767	0.019	0.003	1.7e-12	G	T	0.157388	40.1111
	rs35745599	7	6411449	0.028	0.002	4e-35	T	C	0.238631	196
	rs35493868	7	73625076	0.004	0.002	0.0860003	G	C	0.202047	4
	rs351862	5	177114369	0.018	0.003	2.6e-09	T	C	0.114501	36
	rs35135293	2	20163905	-0.022	0.002	2.7e-28	T	C	0.518821	121
	rs34940374	7	150634289	-0.015	0.003	3.6e-09	A	G	0.182951	25
	rs34642857	3	123332172	-0.013	0.002	4.5e-09	C	T	0.250631	42.25
	rs343	8	19953276	0.103	0.004	1.2e-181	A	C	0.083018	663.062
	rs34180494	15	75077671	-0.013	0.002	4.8e-09	C	A	0.273764	42.25
	rs34138141	17	42629543	-0.018	0.002	1.3e-16	T	G	0.280674	81
	rs34045894	10	33678561	-0.015	0.003	4.8e-08	A	G	0.156314	25
	rs32578	5	149832305	0.012	0.002	5.7e-09	A	G	0.308959	36
	rs3184504	12	111446804	0.017	0.002	2.8e-17	C	T	0.517316	72.25
	rs308	8	19959965	0.088	0.007	9.2e-37	G	T	0.020613	158.041
	rs2965169	19	44747899	0.019	0.002	7.6e-21	C	A	0.388716	90.25
	rs2963468	5	158576012	-0.017	0.002	9e-14	G	A	0.235288	72.25
	rs2943645	2	226234464	-0.034	0.002	1.8e-61	T	C	0.646764	289
	rs2925979	16	81501185	0.029	0.002	6.1e-41	C	T	0.69987	210.25
	rs2910949	5	39522379	0.013	0.002	2.1e-10	G	T	0.354888	42.25
	rs28510484	15	31345366	-0.014	0.003	6.7e-08	C	G	0.170457	21.7778
	rs28362901	15	74420596	-0.025	0.003	1e-12	A	C	0.088368	69.4444
	rs2804894	10	33358163	0.016	0.002	4.8e-13	A	G	0.734838	64
	rs2803619	10	112174626	-0.037	0.002	2.1e-65	C	G	0.724683	342.25
	rs2800710	6	127131436	-0.014	0.002	1.4e-12	C	T	0.518189	49
	rs2750411	6	138905493	-0.011	0.002	5.4e-08	G	T	0.491965	30.25
	rs2740488	9	104899461	-0.08	0.002	1e-200	C	A	0.265536	1600
	rs2723065	2	65052280	0.012	0.002	2e-09	G	A	0.376762	36
	rs267738	1	150968149	0.034	0.002	7.5e-48	G	T	0.219299	289
	rs2645979	12	83623264	0.009	0.002	9.9e-06	A	G	0.357353	20.25
	rs2642438	1	220796686	0.029	0.002	3.3e-42	G	A	0.702624	210.25
	rs2586116	17	40349572	-0.011	0.002	5.6e-07	G	C	0.259453	30.25
	rs254559	5	135109292	-0.017	0.002	1.4e-17	A	C	0.40484	72.25
	rs2544654	5	73592455	0.013	0.002	3.7e-09	T	G	0.715237	42.25
	rs2520096	9	134054294	0.014	0.002	2.3e-10	G	A	0.270128	49
	rs2516331	1	212243647	0.01	0.002	1e-06	A	C	0.375476	25
	rs2494747	14	104792100	-0.032	0.002	4.3e-57	T	G	0.615762	256
	rs2435307	18	23547946	0.014	0.002	5.5e-12	T	C	0.486358	49
	rs2419605	10	112218339	-0.031	0.003	2.2e-29	G	A	0.147796	106.778
	rs2417125	9	128799953	-0.008	0.002	0.000129999	G	A	0.284067	16
	rs2395158	6	32406818	-0.034	0.003	1e-39	G	A	0.16935	128.444
	rs2364723	2	177261818	0.009	0.002	7e-06	C	G	0.319194	20.25
	rs2362541	2	30255587	-0.011	0.002	9.1e-09	G	T	0.507575	30.25
	rs235314	21	44851537	-0.021	0.002	1.5e-27	T	C	0.532284	110.25
	rs2307111	5	75707853	0.008	0.002	4.6e-05	C	T	0.394905	16
	rs2302263	11	64254349	-0.029	0.003	1.5e-16	T	C	0.0887	93.4444
	rs2298632	1	23383982	0.013	0.002	7.1e-11	T	C	0.498021	42.25
	rs2298624	18	49902652	0.032	0.003	2e-28	T	C	0.132474	113.778
	rs2298214	1	999842	-0.013	0.002	4.7e-11	A	C	0.577488	42.25
	rs2297409	9	104813965	-0.037	0.002	1.5e-49	A	G	0.194714	342.25
	rs2294915	22	43945024	-0.02	0.002	1e-17	T	C	0.231744	100
	rs2290866	8	104895605	-0.008	0.002	0.000850002	T	C	0.253167	16
	rs2268840	3	186213385	0.011	0.002	1.9e-06	C	T	0.228391	30.25
	rs2256609	22	21570728	-0.032	0.003	1.9e-37	G	A	0.189292	113.778
	rs2247355	8	102864552	0.018	0.003	3e-12	T	C	0.182653	36
	rs2245095	10	121098082	-0.026	0.003	1.1e-13	T	C	0.088862	75.1111
	rs2237035	4	54660085	0.012	0.002	6.5e-09	T	G	0.385875	36
	rs2196808	2	111081444	0.01	0.002	9.5e-06	C	T	0.731932	25
	rs2159607	3	52467435	-0.02	0.003	1.6e-15	T	G	0.810911	44.4444
	rs2155220	11	76555128	-0.007	0.002	0.000259998	T	C	0.437969	12.25
	rs2098918	4	37149911	0.01	0.002	6.7e-07	T	C	0.455068	25
	rs2098368	7	36229675	-0.008	0.002	0.00012	T	C	0.545962	16
	rs2071379	17	28368811	-0.021	0.002	8.1e-27	G	A	0.595245	110.25
	rs2068888	10	93079885	0.013	0.002	9.8e-12	A	G	0.450403	42.25
	rs2066714	9	104824472	0.054	0.003	7.9e-77	C	T	0.128552	324
	rs201441	7	102094047	-0.011	0.002	1.1e-07	G	T	0.580725	30.25
	rs1970811	10	125007927	-0.012	0.002	4e-09	C	T	0.457761	36
	rs188502504	5	131785472	-0.029	0.005	3e-08	C	T	0.036433	33.64
	rs1862205	5	109320934	0.011	0.002	3.2e-08	A	G	0.404644	30.25
	rs183906992	7	95382636	0.026	0.005	7.3e-08	C	T	0.042747	27.04
	rs1800961	20	44413724	-0.149	0.006	1.3e-152	T	C	0.031062	616.694
	rs1789896	4	99335827	0.015	0.002	2.6e-14	A	G	0.513472	56.25
	rs17713879	2	254215	0.012	0.002	9.1e-10	A	G	0.364612	36
	rs174566	11	61824890	-0.035	0.002	1e-64	G	A	0.350206	306.25
	rs17326656	2	48735152	-0.018	0.002	3.1e-15	T	G	0.238733	81
	rs17309930	11	27726946	-0.02	0.002	5.1e-16	A	C	0.205189	100
	rs17138358	7	17880630	-0.026	0.002	6.6e-39	C	G	0.398512	169
	rs17124112	14	88139165	-0.019	0.004	2.4e-07	A	C	0.079929	22.5625
	rs1661052	11	2921363	0.029	0.003	6.2e-18	A	G	0.908498	93.4444
	rs1601933	15	58379360	-0.084	0.002	1e-200	T	C	0.466597	1764
	rs1534696	7	26357619	0.013	0.002	1.3e-10	A	C	0.540982	42.25
	rs150844304	15	43434427	-0.075	0.006	2e-34	C	A	0.025949	156.25
	rs150483923	7	107316716	0.02	0.002	5.3e-17	A	C	0.225932	100
	rs150237291	18	49254644	0.049	0.007	2.3e-13	C	T	0.021812	49
	rs148827772	4	109844908	-0.057	0.007	3.7e-16	G	A	0.022589	66.3061
	rs147772065	9	104970249	0.031	0.005	6e-09	C	G	0.034764	38.44
	rs1471251	4	87055207	-0.012	0.002	3.4e-09	T	A	0.398192	36
	rs145947882	17	43731839	-0.136	0.006	6.9e-105	C	A	0.026076	513.778
	rs1446585	2	135649909	0.019	0.002	9.2e-17	G	A	0.244189	90.25
	rs144475339	16	56128773	0.058	0.01	2.9e-08	C	G	0.01056	33.64
	rs144311893	19	44920687	0.123	0.007	1.1e-70	T	C	0.021987	308.755
	rs144033177	20	590823	-0.049	0.008	8.9e-10	C	A	0.015828	37.5156
	rs1431659	8	72526835	0.012	0.002	1.7e-07	G	A	0.728407	36
	rs142288236	8	19988101	-0.059	0.008	7.2e-13	T	C	0.014698	54.3906
	rs141469619	11	116843577	-0.15	0.01	2.8e-46	G	A	0.009916	225
	rs141440048	1	182359063	0.033	0.008	2.3e-05	T	C	0.017652	17.0156
	rs1412234	9	28410685	-0.011	0.002	1.4e-07	C	T	0.327155	30.25
	rs1411432	9	16728534	-0.012	0.003	2.5e-06	C	A	0.186454	16
	rs141062196	17	592087	-0.014	0.002	6.1e-09	A	G	0.194469	49
	rs140164052	16	57508330	-0.035	0.006	2.5e-10	A	G	0.031813	34.0278
	rs140064750	8	20048645	-0.031	0.007	2.6e-06	C	T	0.024578	19.6122
	rs1395221	4	24625280	-0.013	0.002	3.9e-11	T	G	0.397633	42.25
	rs1349852	4	68667499	0.019	0.002	2.3e-21	C	A	0.475227	90.25
	rs13389219	2	164672366	0.02	0.002	2.7e-23	T	C	0.39254	100
	rs13379043	14	73783423	0.022	0.002	1.5e-22	C	T	0.280373	121
	rs133015	22	38176519	0.02	0.002	5.6e-24	G	C	0.44	100
	rs13269725	8	71547654	-0.019	0.004	1.7e-07	G	A	0.078354	22.5625
	rs1318175	15	58293930	-0.078	0.003	3.4e-186	T	C	0.159965	676
	rs13144151	4	145482013	0.014	0.003	4.1e-07	G	A	0.850016	21.7778
	rs13137144	4	973657	0.012	0.002	4.7e-10	A	G	0.46135	36
	rs13111599	4	82995884	0.012	0.002	5.2e-08	G	A	0.737167	36
	rs13107325	4	102267552	-0.072	0.004	1.7e-82	T	C	0.074994	324
	rs13087167	3	186160351	0.014	0.002	3.5e-12	C	G	0.633015	49
	rs13066793	3	86988393	0.013	0.003	0.000140001	G	A	0.090121	18.7778
	rs12998038	2	42375247	0.008	0.002	0.00025	T	C	0.258661	16
	rs12987470	2	187458584	0.012	0.002	2.2e-08	T	A	0.294649	36
	rs12986742	2	58748008	-0.008	0.002	4.4e-05	C	T	0.475981	16
	rs12943517	17	4180628	-0.012	0.002	2.4e-08	A	G	0.310724	36
	rs12928099	16	15056648	0.013	0.002	9.9e-10	A	C	0.296023	42.25
	rs12926854	16	85917652	0.009	0.002	5.7e-05	G	A	0.269879	20.25
	rs12898210	15	58347511	-0.049	0.003	6.4e-60	G	T	0.121583	266.778
	rs1281959	6	153136413	0.01	0.002	6.5e-07	G	C	0.525667	25
	rs12740374	1	109274968	0.044	0.002	1.1e-78	T	G	0.220913	484
	rs12705595	7	109463855	0.01	0.002	1.4e-06	A	G	0.373407	25
	rs12686780	9	92620015	-0.012	0.003	2.1e-06	T	C	0.175006	16
	rs1260326	2	27508073	-0.026	0.002	4.5e-38	C	T	0.604673	169
	rs12575456	11	47304522	0.035	0.002	1.9e-62	A	G	0.321706	306.25
	rs12475332	2	226367331	0.011	0.002	8.1e-07	G	T	0.261048	30.25
	rs12462109	19	51840243	-0.013	0.002	6.4e-10	T	C	0.287067	42.25
	rs12436555	14	24165616	-0.015	0.003	1.8e-08	A	G	0.173179	25
	rs1240820	6	16824906	0.01	0.002	1.4e-06	A	G	0.293196	25
	rs1225053	3	131924008	-0.011	0.002	2.7e-07	C	T	0.264574	30.25
	rs12229011	12	124599168	-0.019	0.003	8.7e-09	T	C	0.097465	40.1111
	rs12205778	6	42947011	0.019	0.002	1.2e-16	A	G	0.258874	90.25
	rs12046972	1	219499801	-0.012	0.002	1.7e-09	C	T	0.56407	36
	rs117847213	11	111551181	0.021	0.005	2.4e-05	G	A	0.040824	17.64
	rs117762989	11	62836172	-0.024	0.005	8.4e-07	T	C	0.043039	23.04
	rs117399007	15	58972800	-0.029	0.005	2.5e-09	T	C	0.043444	33.64
	rs117291242	11	380315	-0.03	0.005	1.1e-08	T	C	0.036552	36
	rs117230571	13	41114931	-0.023	0.004	1.1e-09	G	A	0.077003	33.0625
	rs11688682	2	120590036	0.011	0.002	1.4e-06	C	G	0.27086	30.25
	rs116857878	16	57018671	0.041	0.007	1.1e-08	T	C	0.020348	34.3061
	rs116843064	19	8364439	0.133	0.007	4.8e-78	A	G	0.019315	361
	rs1168124	1	62674059	0.043	0.002	1.2e-95	T	C	0.65073	462.25
	rs11664369	18	60071840	-0.021	0.002	5.6e-22	T	C	0.26696	110.25
	rs11640494	16	87996079	-0.013	0.002	4.1e-11	A	G	0.456673	42.25
	rs11632618	15	58432507	0.108	0.004	1.1e-173	A	G	0.06962	729
	rs116006942	5	54109484	-0.028	0.004	9.4e-12	A	G	0.060786	49
	rs114165349	1	26695422	-0.068	0.007	4.6e-25	C	G	0.023139	94.3673
	rs113966472	16	56411282	0.03	0.006	2.6e-07	A	G	0.032405	25
	rs113740515	12	122714863	0.028	0.002	3.3e-31	A	G	0.2094	196
	rs1132274	20	17615510	-0.029	0.003	3.2e-26	A	C	0.154087	93.4444
	rs1125873	9	104959142	0.012	0.002	5.1e-10	T	A	0.492029	36
	rs11254464	10	17223448	0.007	0.002	0.000189998	C	T	0.42311	12.25
	rs112350227	2	160235122	-0.032	0.006	7.3e-08	T	C	0.027667	28.4444
	rs11218738	11	122654243	0.018	0.002	1.1e-15	A	G	0.249464	81
	rs112001035	17	68827664	-0.048	0.004	5.4e-30	A	G	0.060536	144
	rs111849006	14	52115175	0.015	0.003	1.7e-08	A	G	0.181219	25
	rs11171710	12	55974294	-0.008	0.002	3.1e-05	A	G	0.448217	16
	rs111363680	12	123682724	0.028	0.006	3.9e-06	T	C	0.031376	21.7778
	rs11045171	12	20317265	0.022	0.002	3.3e-19	G	A	0.197589	121
	rs11021232	11	95587644	-0.016	0.003	1.3e-10	C	T	0.181005	28.4444
	rs11009262	10	33159836	-0.022	0.004	2.3e-07	T	G	0.057333	30.25
	rs10883451	10	100164661	0.022	0.002	1.8e-29	C	T	0.496282	121
	rs10876447	12	53377157	-0.019	0.003	9.3e-13	A	G	0.154052	40.1111
	rs1083470	2	147113546	0.011	0.002	8.1e-08	A	G	0.615779	30.25
	rs10774439	12	6622652	0.016	0.003	1.3e-10	A	G	0.814838	28.4444
	rs10750766	11	65706327	-0.015	0.002	7.8e-12	A	C	0.709869	56.25
	rs10748165	12	70978610	0.011	0.002	2.1e-08	T	C	0.504155	30.25
	rs1055582	4	39698553	0.016	0.002	2.4e-15	T	C	0.505137	64
	rs10513801	3	186104564	-0.021	0.003	3.6e-13	G	T	0.137208	49
	rs10504477	8	70425950	-0.012	0.002	1.2e-09	C	T	0.412293	36
	rs1047891	2	210675783	-0.026	0.002	3.3e-34	A	C	0.315663	169
	rs1037117	15	101528455	0.016	0.002	9.5e-13	A	G	0.254731	64
	rs10271082	7	1041926	-0.019	0.002	1.7e-21	C	G	0.407793	90.25
	rs10170658	2	237791327	-0.013	0.002	1.7e-08	T	G	0.222908	42.25
	rs10108282	8	9863436	0.011	0.002	5.5e-06	A	T	0.205708	30.25
	rs10053349	5	79179600	0.008	0.002	3.2e-05	C	T	0.390257	16
	rs10023962	4	177038357	0.018	0.003	3.8e-12	G	T	0.816753	36
Model 3
HDL-C	rs9989419	16	56951227	0.144	0.002	0	G	A	0.605917	5184
	rs9987289	8	9325848	0.087	0.003	9.1e-155	G	A	0.908737	841
	rs998584	6	43790159	-0.034	0.002	1.1e-71	A	C	0.482733	289
	rs9977268	21	45487373	-0.016	0.002	7.4e-11	T	C	0.1987	64
	rs9933509	16	53784255	-0.014	0.002	2.4e-13	C	T	0.413899	49
	rs9834932	3	32493890	0.001	0.003	0.7	G	A	0.08896	0.111111
	rs976002	4	68477569	0.016	0.002	1e-12	G	A	0.245341	64
	rs968050	6	98126684	0.014	0.002	8.1e-13	T	C	0.48238	49
	rs9647335	3	136161568	0.028	0.002	2.4e-30	T	A	0.191928	196
	rs9608972	22	30535320	-0.017	0.002	1.4e-14	C	T	0.24146	72.25
	rs9604045	13	113272893	0.018	0.002	2e-14	T	G	0.253572	81
	rs9584870	13	98593612	0.01	0.002	1e-06	C	T	0.366281	25
	rs9561643	13	94600877	-0.005	0.002	0.017	C	A	0.314761	6.25
	rs9496567	6	100154877	-0.001	0.002	0.77	A	G	0.243536	0.25
	rs9480889	6	108867818	-0.017	0.002	1.2e-13	G	C	0.783024	72.25
	rs9465693	6	20312889	-0.012	0.002	6.2e-09	A	C	0.304872	36
	rs9426827	1	154617489	0.009	0.002	6.2e-06	C	T	0.47811	20.25
	rs921919	12	124780655	-0.042	0.002	1.4e-90	A	G	0.669162	441
	rs867939	18	22331727	0.011	0.002	4.6e-08	A	G	0.576368	30.25
	rs830620	3	71629997	0.015	0.002	9.6e-15	T	C	0.415386	56.25
	rs8102873	19	56977055	-0.011	0.002	1.5e-08	T	C	0.584663	30.25
	rs8086351	18	49645518	0.084	0.003	6.19e-246	G	C	0.824212	784
	rs8081548	17	7535517	0.018	0.002	6.9e-20	A	T	0.658521	81
	rs80236739	15	58680500	-0.028	0.004	3.4e-10	G	A	0.049802	49
	rs8016418	14	70331572	-0.008	0.002	6.4e-05	A	T	0.375016	16
	rs80005209	8	20014828	-0.144	0.006	2.5e-144	G	T	0.029614	576
	rs79828839	10	50592671	-0.003	0.002	0.17	T	C	0.198849	2.25
	rs79600951	16	56800342	-0.107	0.003	1.7e-235	G	C	0.092057	1272.11
	rs79506257	13	102901217	0.017	0.005	0.00021	A	G	0.047808	11.56
	rs79357714	11	117031923	-0.007	0.005	0.11	G	A	0.045793	1.96
	rs79287178	3	172576710	-0.021	0.006	0.000309999	A	G	0.031122	12.25
	rs79220007	6	26098246	-0.008	0.004	0.0350002	C	T	0.076188	4
	rs79153732	8	19805426	-0.094	0.007	4.2e-38	T	C	0.017377	180.327
	rs79149284	19	45010596	-0.017	0.005	0.000430002	T	C	0.038359	11.56
	rs78965095	18	49091501	0.036	0.007	1e-07	T	C	0.020298	26.449
	rs7861679	9	120613311	-0.007	0.002	0.000470002	T	C	0.696879	12.25
	rs78588343	6	7249227	0.013	0.002	6.7e-08	A	G	0.176361	42.25
	rs78484485	11	116727349	0.073	0.004	9.2e-67	A	G	0.053935	333.062
	rs7817574	8	143220400	0.033	0.002	3.5e-42	C	T	0.185003	272.25
	rs78058190	2	218835276	-0.078	0.005	1.8e-57	A	G	0.050415	243.36
	rs77960347	18	49583585	0.291	0.008	4.2e-269	G	A	0.013349	1323.14
	rs7786339	7	72674114	-0.003	0.003	0.25	T	C	0.168933	1
	rs77542162	17	69085137	-0.009	0.006	0.14	G	A	0.022455	2.25
	rs7746081	6	16126703	0.001	0.002	0.75	A	G	0.304325	0.25
	rs7735249	5	54014309	-0.021	0.003	4.3e-12	G	C	0.11282	49
	rs7734476	5	123513182	0	0.002	0.95	A	G	0.550071	0
	rs7725218	5	1282299	-0.012	0.002	1.2e-09	A	G	0.338422	36
	rs771481	1	93381096	0.029	0.002	9.1e-32	A	T	0.18382	210.25
	rs7714361	5	113154932	-0.009	0.002	7.8e-05	C	A	0.233693	20.25
	rs7704653	5	90959868	-0.008	0.002	8.3e-05	G	A	0.722957	16
	rs76962725	1	224239431	-0.028	0.005	4.6e-08	A	G	0.037253	31.36
	rs76456334	7	25788347	-0.029	0.005	3e-09	C	T	0.039665	33.64
	rs76247316	3	160364496	-0.011	0.002	2.4e-09	C	T	0.479856	30.25
	rs76186504	1	109297547	0.014	0.006	0.021	T	C	0.025013	5.44444
	rs7603427	2	203452830	-0.004	0.002	0.0219999	T	C	0.533489	4
	rs7583067	2	100180388	0.015	0.002	6.6e-11	T	C	0.240114	56.25
	rs75662196	8	20084145	0.068	0.006	6.7e-31	C	G	0.027941	128.444
	rs75609851	8	20013569	0.17	0.01	1.4e-69	A	G	0.010454	289
	rs75406471	10	5215684	-0.014	0.003	1.1e-07	A	G	0.154193	21.7778
	rs75268115	11	18280368	-0.003	0.003	0.450001	G	A	0.084658	1
	rs75152587	16	56546049	-0.094	0.008	1.1e-28	T	G	0.012738	138.062
	rs75032664	8	19834914	-0.055	0.009	1.3e-09	G	C	0.012909	37.3457
	rs74500135	9	103841535	0.067	0.01	2.3e-11	C	T	0.009847	44.89
	rs742036	16	910725	0.009	0.002	1.3e-06	A	G	0.375325	20.25
	rs7400002	13	113821971	-0.002	0.002	0.27	G	A	0.230544	1
	rs73455693	18	60360263	0.028	0.005	3.9e-08	A	G	0.037231	31.36
	rs73243877	4	26045994	-0.025	0.003	2.5e-23	G	A	0.168086	69.4444
	rs73216701	3	109146446	0.011	0.002	7.6e-09	G	A	0.430022	30.25
	rs7308584	12	6597578	-0.02	0.002	8.2e-16	A	G	0.184257	100
	rs73075609	20	5600143	-0.013	0.006	0.0290001	T	C	0.026702	4.69444
	rs7304603	12	70720620	-0.011	0.002	2e-08	C	T	0.537671	30.25
	rs729761	6	43836834	-0.009	0.002	3.6e-05	G	T	0.711787	20.25
	rs72926946	2	202613145	-0.021	0.002	3.1e-23	A	C	0.296376	110.25
	rs72911393	17	78394924	-0.023	0.003	3.6e-17	T	C	0.147729	58.7778
	rs7281183	21	15039346	-0.013	0.002	6.3e-09	A	G	0.737142	42.25
	rs72801474	5	133108436	0.021	0.003	1e-10	A	G	0.091899	49
	rs7274718	20	57538727	-0.006	0.002	0.00109999	A	G	0.5984	9
	rs72631343	17	69195129	0.005	0.003	0.0909997	G	C	0.128982	2.77778
	rs72555385	7	73709143	-0.027	0.004	1.1e-09	G	A	0.048966	45.5625
	rs7244	5	154420953	-0.01	0.003	0.000109999	A	G	0.174272	11.1111
	rs7202323	16	72183214	0.005	0.002	0.0269998	G	T	0.229693	6.25
	rs7186799	16	57186104	-0.022	0.002	5.2e-31	C	A	0.437388	121
	rs7170463	15	41596720	0.019	0.002	4.2e-20	G	A	0.311432	90.25
	rs71603401	4	18032840	-0.015	0.003	3.2e-08	G	A	0.136851	25
	rs7147511	14	100328481	-0.009	0.002	1.9e-06	T	C	0.495469	20.25
	rs7140110	13	113841051	-0.001	0.002	0.79	C	T	0.298456	0.25
	rs71311871	3	58434886	-0.01	0.003	0.00350002	G	A	0.083274	11.1111
	rs7077812	10	79336314	-0.004	0.002	0.0949992	C	T	0.194984	4
	rs703966	10	79194494	0.016	0.002	4.9e-16	A	G	0.418881	64
	rs7032795	9	114372665	0.013	0.002	1.9e-12	C	T	0.4936	42.25
	rs6999569	8	125463528	0.034	0.002	2.8e-70	G	A	0.470695	289
	rs696825	9	83968161	0.013	0.002	2.3e-09	T	C	0.252911	42.25
	rs6916318	6	127113961	-0.019	0.002	1.3e-23	T	A	0.530597	90.25
	rs6882076	5	156963286	0.008	0.002	7.7e-05	C	T	0.634088	16
	rs686030	9	15304784	0.05	0.003	6.5e-74	A	C	0.858823	277.778
	rs681869	18	2981400	-0.01	0.002	1.5e-06	T	C	0.70421	25
	rs6800707	3	52482277	-0.024	0.002	9.3e-23	G	C	0.810446	144
	rs6792725	3	24478792	0.002	0.002	0.36	G	A	0.692486	1
	rs6765484	3	50003880	0.023	0.002	3.9e-32	T	C	0.472827	132.25
	rs6762415	3	133759713	-0.011	0.002	1.2e-08	G	T	0.535292	30.25
	rs6709904	2	43853185	-0.005	0.003	0.0830004	G	A	0.112372	2.77778
	rs67038483	21	31723790	0.004	0.005	0.34	T	C	0.044856	0.64
	rs6689611	1	109288646	0.035	0.009	5.5e-05	A	G	0.012404	15.1235
	rs6657811	1	109264661	0.027	0.003	1.2e-21	T	A	0.129774	81
	rs6562773	13	73614798	0.005	0.002	0.012	G	A	0.547349	6.25
	rs6560499	9	76115850	0.003	0.002	0.17	A	G	0.575931	2.25
	rs6544713	2	43846742	-0.005	0.002	0.0129999	C	T	0.677083	6.25
	rs6506033	18	289209	0.019	0.004	2e-07	T	C	0.072522	22.5625
	rs6505176	17	30334751	-0.013	0.002	7.4e-11	G	T	0.33147	42.25
	rs6475606	9	22081851	-0.002	0.002	0.34	T	C	0.484427	1
	rs6469605	8	115589667	0.032	0.002	5.8e-61	T	C	0.568501	256
	rs6460894	7	12207704	-0.012	0.002	1.6e-09	C	T	0.339247	36
	rs6426328	1	246727958	-0.004	0.002	0.05	T	G	0.489974	4
	rs62473520	7	130898683	0.015	0.004	2.3e-05	C	T	0.07802	14.0625
	rs62428831	6	142926024	0.018	0.003	1e-10	C	T	0.141547	36
	rs62405458	5	180798919	-0.013	0.002	8.7e-08	T	C	0.182638	42.25
	rs62397245	5	177323687	-0.009	0.002	0.000140001	G	C	0.222389	20.25
	rs62369502	5	43815476	-0.018	0.004	9.8e-07	C	T	0.076466	20.25
	rs62274099	3	157092789	-0.01	0.002	8.8e-07	T	C	0.423919	25
	rs62271373	3	150348753	-0.041	0.004	2.5e-23	A	T	0.059972	105.063
	rs62246443	3	47130917	-0.015	0.003	3.8e-09	C	T	0.174261	25
	rs6224	15	90880313	0.01	0.002	1.5e-07	T	G	0.473666	25
	rs62135193	2	48528338	-0.01	0.002	2.4e-07	T	C	0.541321	25
	rs62122481	2	20993943	-0.014	0.002	1.1e-12	A	C	0.377007	49
	rs62119267	19	44631381	0.044	0.007	2.7e-11	C	A	0.022438	39.5102
	rs62112763	19	7220002	-0.014	0.002	2.9e-13	G	C	0.438907	49
	rs62102718	19	33400107	-0.024	0.002	3.4e-29	T	A	0.286413	144
	rs61980899	14	81210500	-0.013	0.002	7.4e-12	C	T	0.537796	42.25
	rs61905078	11	116725593	-0.085	0.004	1e-119	C	A	0.073874	451.563
	rs61884005	11	14381384	0.016	0.003	2.4e-08	G	C	0.121445	28.4444
	rs61805075	1	182167266	-0.026	0.002	6e-37	A	G	0.328694	169
	rs61754230	12	71785666	-0.013	0.007	0.0569994	T	C	0.019805	3.44898
	rs61729990	11	117181816	-0.026	0.007	0.000389996	A	C	0.017872	13.7959
	rs61596977	8	94984937	-0.016	0.003	3.1e-09	T	C	0.140363	28.4444
	rs61435086	8	20052781	0.089	0.009	3.7e-25	C	T	0.012312	97.7901
	rs61352607	12	57445390	0.031	0.002	4.4e-43	T	G	0.240851	240.25
	rs6074012	20	46071527	-0.005	0.002	0.017	C	T	0.524133	6.25
	rs59104589	2	241298487	0.015	0.002	3.5e-14	T	C	0.358286	56.25
	rs58542926	19	19268740	-0.007	0.004	0.0449997	T	C	0.074712	3.0625
	rs58298943	12	56997508	0.02	0.003	3.8e-09	T	C	0.084318	44.4444
	rs58148580	4	123837618	-0.009	0.003	0.00389996	T	C	0.109656	9
	rs57274629	1	65644609	0.013	0.002	1.9e-11	G	A	0.357618	42.25
	rs56902258	14	23263905	0.008	0.002	0.00109999	A	T	0.196219	16
	rs564832	11	30396699	-0.012	0.002	1.2e-08	C	T	0.315005	36
	rs559355	11	75740236	-0.035	0.003	9e-41	T	A	0.1573	136.111
	rs55812947	7	44751208	-0.015	0.003	1.4e-07	C	T	0.128943	25
	rs55714927	17	7176997	0.004	0.002	0.0779992	T	C	0.190291	4
	rs55637835	1	55000630	0.004	0.003	0.19	T	C	0.120861	1.77778
	rs556107	1	234717312	0.015	0.002	7.1e-15	T	C	0.523253	56.25
	rs4976033	5	68418419	-0.012	0.002	1.1e-09	G	A	0.401824	36
	rs49675	8	9294178	0.021	0.003	7.1e-11	A	G	0.098073	49
	rs4930352	11	66299522	0.016	0.002	7.3e-17	T	G	0.494128	64
	rs4875043	8	143414602	-0.015	0.002	1.3e-10	C	A	0.216821	56.25
	rs483808	19	7892596	0.012	0.002	5.8e-09	T	C	0.701868	36
	rs480823	11	116655013	-0.065	0.004	3.4e-73	C	T	0.079103	264.063
	rs4807462	19	3408667	-0.011	0.002	1.2e-08	T	A	0.359497	30.25
	rs4803818	19	45411025	-0.016	0.006	0.012	T	C	0.023133	7.11111
	rs478975	1	234637627	0.001	0.002	0.719999	A	G	0.642667	0.25
	rs4784709	16	56677463	-0.075	0.005	3e-55	A	T	0.959159	225
	rs4762756	12	20444643	0.013	0.002	6.5e-09	C	T	0.735634	42.25
	rs4761234	12	69338325	0.004	0.002	0.0309999	C	T	0.484322	4
	rs4731701	7	130746171	0.03	0.002	2.1e-54	T	C	0.493001	225
	rs472495	1	55055640	0.007	0.002	0.000870001	T	G	0.648999	12.25
	rs4689088	4	7220526	0.001	0.002	0.649999	A	G	0.618927	0.25
	rs4676609	3	39172765	0.006	0.002	0.015	T	C	0.196407	9
	rs4665972	2	27375230	0.005	0.002	0.0129999	C	T	0.604796	6.25
	rs4660586	1	41941558	0.009	0.002	1.5e-05	T	C	0.739226	20.25
	rs4650994	1	178546177	-0.018	0.002	2.1e-21	A	G	0.531842	81
	rs460428	22	29575000	-0.014	0.002	2.5e-10	C	T	0.230673	49
	rs45537841	7	87481324	-0.006	0.002	0.0259998	T	C	0.180832	9
	rs454715	19	48610979	-0.004	0.002	0.0530005	G	T	0.582686	4
	rs4470903	7	21565298	-0.001	0.002	0.61	G	C	0.215037	0.25
	rs41785	7	116845966	0.005	0.002	0.00990011	A	C	0.417255	6.25
	rs407133	21	45151974	-0.011	0.002	4.6e-08	C	G	0.558791	30.25
	rs3924313	12	124843829	-0.024	0.002	1.6e-31	A	G	0.322221	144
	rs3828960	7	135509865	-0.012	0.002	2.4e-07	G	A	0.206508	36
	rs3823376	6	29976407	0	0.002	1	T	C	0.502359	0
	rs3814883	16	29983601	-0.015	0.002	5.9e-16	T	C	0.482467	56.25
	rs3802548	10	45457297	0.029	0.002	8.2e-38	A	T	0.240619	210.25
	rs3798233	6	115995929	0.016	0.002	7.9e-17	C	A	0.402044	64
	rs3794752	17	55305468	0.013	0.002	2e-09	C	T	0.280634	42.25
	rs3775228	4	87064014	-0.02	0.002	2.4e-24	T	C	0.399421	100
	rs3768321	1	39570256	-0.045	0.002	1.5e-79	T	G	0.196691	506.25
	rs3749748	5	128014857	0.017	0.002	8.2e-14	T	C	0.247265	72.25
	rs3747973	1	205708020	0.014	0.002	2.7e-13	G	A	0.592542	49
	rs3746915	21	42298682	0.011	0.002	2.1e-08	G	A	0.580939	30.25
	rs3745683	19	11237845	-0.055	0.004	3.2e-51	A	G	0.074638	189.062
	rs3732356	3	119810266	-0.03	0.004	1e-14	T	G	0.933782	56.25
	rs35882350	12	513963	-0.002	0.002	0.33	G	A	0.260785	1
	rs35764292	2	21254157	-0.019	0.005	6.8e-05	G	A	0.040593	14.44
	rs35763453	12	45822112	-0.009	0.004	0.0230001	C	T	0.058622	5.0625
	rs35745599	7	6411449	0.027	0.002	1e-32	T	C	0.238665	182.25
	rs35081008	19	58150868	0.002	0.003	0.47	T	C	0.148288	0.444444
	rs34642857	3	123332172	-0.012	0.002	1.7e-08	C	T	0.250581	36
	rs343	8	19953276	0.134	0.003	0	A	C	0.08307	1995.11
	rs34265667	8	41684575	-0.017	0.005	0.00129999	A	G	0.033996	11.56
	rs34180494	15	75077671	-0.011	0.002	3.2e-07	C	A	0.273728	30.25
	rs34045894	10	33678561	-0.017	0.003	4.6e-11	A	G	0.15624	32.1111
	rs325485	5	104659667	0.01	0.002	2.2e-07	G	A	0.602503	25
	rs3184504	12	111446804	0.027	0.002	3.9e-44	C	T	0.517322	182.25
	rs308	8	19959965	0.127	0.007	1.1e-79	G	T	0.020639	329.163
	rs2943645	2	226234464	-0.043	0.002	5.9e-106	T	C	0.646663	462.25
	rs2937124	16	69828206	0.009	0.002	1.8e-05	T	C	0.362776	20.25
	rs2925979	16	81501185	0.037	0.002	1.6e-73	C	T	0.699999	342.25
	rs2910949	5	39522379	0.013	0.002	2e-11	G	T	0.354888	42.25
	rs28577186	16	4438190	0.005	0.002	0.0109999	A	G	0.664539	6.25
	rs28383314	6	32619436	0.011	0.002	3e-08	C	T	0.62419	30.25
	rs28362901	15	74420596	-0.024	0.003	1.2e-12	A	C	0.088332	64
	rs2812208	13	50132951	0.016	0.007	0.02	C	G	0.020949	5.22449
	rs2804894	10	33358163	0.017	0.002	2.3e-15	A	G	0.734831	72.25
	rs2803619	10	112174626	-0.036	0.002	6e-64	C	G	0.724583	324
	rs275184	15	39152478	0.01	0.003	0.00025	G	T	0.161911	11.1111
	rs2750411	6	138905493	-0.011	0.002	1.4e-08	G	T	0.4919	30.25
	rs2740488	9	104899461	-0.069	0.002	2.6e-221	C	A	0.265328	1190.25
	rs2738447	19	11116804	-0.007	0.002	0.000350002	C	A	0.592591	12.25
	rs2726112	7	36139143	-0.016	0.002	2.2e-16	G	A	0.453739	64
	rs267738	1	150968149	0.021	0.002	9.9e-21	G	T	0.219354	110.25
	rs2645979	12	83623264	0.011	0.002	8.7e-09	A	G	0.357369	30.25
	rs2642438	1	220796686	0.028	0.002	2.1e-40	G	A	0.702698	196
	rs2618566	20	17864040	0	0.002	0.87	T	G	0.659944	0
	rs2586116	17	40349572	-0.016	0.002	7.1e-14	G	C	0.259435	64
	rs254559	5	135109292	-0.011	0.002	3.5e-09	A	C	0.404831	30.25
	rs2544654	5	73592455	0.01	0.002	7.5e-07	T	G	0.715235	25
	rs2520096	9	134054294	0.015	0.002	7.7e-12	G	A	0.270192	56.25
	rs2516331	1	212243647	0.013	0.002	1.1e-10	A	C	0.375524	42.25
	rs2494747	14	104792100	-0.025	0.002	5.7e-38	T	G	0.61559	156.25
	rs2435307	18	23547946	0.016	0.002	1.5e-17	T	C	0.48634	64
	rs2419605	10	112218339	-0.03	0.003	8.7e-29	G	A	0.147744	100
	rs2417125	9	128799953	-0.013	0.002	5.2e-10	G	A	0.284014	42.25
	rs2407278	8	37541772	0.017	0.006	0.00309999	G	A	0.030202	8.02778
	rs235314	21	44851537	-0.018	0.002	2.4e-20	T	C	0.532212	81
	rs2339234	5	171185542	-0.012	0.002	7.3e-09	A	G	0.683004	36
	rs2302263	11	64254349	-0.036	0.003	1.6e-27	T	C	0.088695	144
	rs2298632	1	23383982	0.014	0.002	9.7e-14	T	C	0.498073	49
	rs2298624	18	49902652	0.03	0.003	1.1e-26	T	C	0.132532	100
	rs2298214	1	999842	-0.012	0.002	1.6e-10	A	C	0.577365	36
	rs2297409	9	104813965	-0.033	0.002	1e-43	A	G	0.194635	272.25
	rs2294915	22	43945024	-0.012	0.002	3.8e-08	T	C	0.231686	36
	rs2290866	8	104895605	-0.012	0.002	4.6e-08	T	C	0.253153	36
	rs2287622	2	168973818	-0.008	0.002	2.1e-05	G	A	0.602675	16
	rs2268840	3	186213385	0.017	0.002	2.2e-14	C	T	0.22846	72.25
	rs2256609	22	21570728	-0.033	0.002	2.2e-41	G	A	0.189238	272.25
	rs2247355	8	102864552	0.021	0.002	5.1e-17	T	C	0.182679	110.25
	rs2240466	7	73441939	0.037	0.003	5e-37	A	G	0.122767	152.111
	rs2238162	13	32385062	0.002	0.002	0.42	T	C	0.52309	1
	rs2237035	4	54660085	0.014	0.002	1.2e-12	T	G	0.385886	49
	rs2199048	17	75872207	0.004	0.002	0.0369999	G	A	0.313946	4
	rs2187114	18	72850603	0.007	0.003	0.0189998	A	G	0.101134	5.44444
	rs2155220	11	76555128	-0.011	0.002	3.8e-08	T	C	0.437951	30.25
	rs2131919	9	92521605	-0.016	0.003	2.4e-10	G	A	0.164245	28.4444
	rs2111705	14	74794938	-0.015	0.002	1.1e-14	A	G	0.543846	56.25
	rs2098918	4	37149911	0.012	0.002	5.8e-10	T	C	0.45513	36
	rs2073547	7	44542732	-0.003	0.002	0.26	G	A	0.184118	2.25
	rs2071379	17	28368811	-0.014	0.002	3.3e-12	G	A	0.595143	49
	rs2068888	10	93079885	0.019	0.002	1.3e-23	A	G	0.450441	90.25
	rs2066714	9	104824472	0.047	0.003	3.4e-60	C	T	0.128622	245.444
	rs201441	7	102094047	-0.011	0.002	1.4e-08	G	T	0.580679	30.25
	rs1970811	10	125007927	-0.012	0.002	1.4e-09	C	T	0.457743	36
	rs1938566	1	98013425	0.011	0.003	2.1e-05	T	C	0.834553	13.4444
	rs1888488	21	39314595	-0.005	0.002	0.0109999	T	C	0.565279	6.25
	rs188608977	1	109182782	0.01	0.01	0.27	T	G	0.010554	1
	rs1883711	20	40551182	-0.009	0.006	0.11	C	G	0.031552	2.25
	rs1862205	5	109320934	0.011	0.002	5.8e-09	A	G	0.404725	30.25
	rs183906992	7	95382636	0.029	0.005	5.5e-10	C	T	0.04275	33.64
	rs1801689	17	66214462	0.013	0.006	0.0189998	C	A	0.030448	4.69444
	rs1800961	20	44413724	-0.139	0.006	1.5e-140	T	C	0.031001	536.694
	rs17713879	2	254215	0.014	0.002	2e-12	A	G	0.364695	49
	rs1760940	14	20470092	0.012	0.002	3.9e-08	C	A	0.24702	36
	rs1760801	1	154287174	0.005	0.002	0.0129999	A	G	0.295535	6.25
	rs17585887	6	139514361	0.019	0.002	6.7e-22	C	T	0.59082	90.25
	rs174566	11	61824890	-0.056	0.002	1.2e-174	G	A	0.350061	784
	rs17309930	11	27726946	-0.022	0.002	1.5e-20	A	C	0.205132	121
	rs17138358	7	17880630	-0.027	0.002	2.2e-44	C	G	0.398392	182.25
	rs17124112	14	88139165	-0.021	0.004	3.8e-09	A	C	0.07993	27.5625
	rs17050272	2	120548864	0.006	0.002	0.000790005	A	G	0.409314	9
	rs17036085	1	109291417	0.006	0.009	0.5	G	A	0.012118	0.444444
	rs1601933	15	58379360	-0.071	0.002	2.4e-293	T	C	0.466403	1260.25
	rs1567353	9	1033773	-0.011	0.002	5.3e-08	G	C	0.307514	30.25
	rs150820726	19	44723891	0.016	0.01	0.1	T	A	0.010367	2.56
	rs150555490	11	116826365	0.022	0.004	1.2e-07	T	C	0.056772	30.25
	rs150503754	19	45075984	0.025	0.008	0.0017	C	T	0.014941	9.76563
	rs150483923	7	107316716	0.017	0.002	9.6e-14	A	C	0.225962	72.25
	rs150474434	2	118087545	-0.002	0.003	0.57	A	G	0.101602	0.444444
	rs150460588	15	56731259	-0.013	0.005	0.00619998	C	T	0.044411	6.76
	rs150423652	11	116733100	-0.133	0.012	2.1e-29	T	G	0.006638	122.84
	rs150237291	18	49254644	0.045	0.007	5.1e-12	C	T	0.021799	41.3265
	rs148933445	19	44799247	0.051	0.007	2.1e-13	A	G	0.021789	53.0816
	rs148827772	4	109844908	-0.038	0.007	3.1e-08	G	A	0.02259	29.4694
	rs148601586	19	44843409	-0.059	0.009	6.1e-12	G	C	0.013246	42.9753
	rs147772065	9	104970249	0.029	0.005	4.1e-08	C	G	0.034794	33.64
	rs147539187	6	11838809	0.001	0.004	0.73	G	C	0.073607	0.0625
	rs146534110	6	160157037	0.009	0.008	0.28	T	G	0.013235	1.26562
	rs145947882	17	43731839	-0.165	0.006	4.7e-161	C	A	0.026042	756.25
	rs145730801	14	94301859	-0.003	0.005	0.52	C	T	0.0444	0.36
	rs1446585	2	135649909	0.017	0.002	1.1e-14	G	A	0.244295	72.25
	rs144475339	16	56128773	0.053	0.01	1.6e-07	C	G	0.010556	28.09
	rs1431659	8	72526835	0.013	0.002	2.3e-09	G	A	0.728463	42.25
	rs143076454	16	871179	-0.013	0.007	0.0659994	A	G	0.018665	3.44898
	rs142288236	8	19988101	-0.078	0.008	1.6e-22	T	C	0.01469	95.0625
	rs1420384	2	170727366	0.008	0.002	0.00015	T	G	0.666922	16
	rs141440048	1	182359063	0.044	0.008	7.8e-09	T	C	0.017665	30.25
	rs1412234	9	28410685	-0.012	0.002	3.9e-09	C	T	0.327133	36
	rs1411432	9	16728534	-0.014	0.002	1.3e-08	C	A	0.186415	49
	rs141062196	17	592087	-0.019	0.002	5.2e-15	A	G	0.194436	90.25
	rs140164052	16	57508330	-0.042	0.005	1.2e-14	A	G	0.031786	70.56
	rs140064750	8	20048645	-0.044	0.006	3.7e-12	C	T	0.024546	53.7778
	rs139974673	15	43735687	-0.088	0.006	3.5e-49	C	T	0.026226	215.111
	rs1395221	4	24625280	-0.011	0.002	1e-08	T	G	0.397646	30.25
	rs138692741	19	44963875	-0.013	0.005	0.015	T	C	0.035767	6.76
	rs138191773	6	71812618	0.021	0.008	0.0051	A	G	0.016998	6.89063
	rs138026891	2	20886574	0.021	0.009	0.0259998	T	C	0.010555	5.44444
	rs1349852	4	68667499	0.011	0.002	5.8e-09	C	A	0.475293	30.25
	rs134551	22	28411637	0.007	0.002	0.000219999	T	C	0.335289	12.25
	rs13389219	2	164672366	0.028	0.002	4.5e-46	T	C	0.392619	196
	rs13379043	14	73783423	0.02	0.002	4.7e-20	C	T	0.28042	100
	rs13354321	5	158498289	0.01	0.002	1.4e-07	C	T	0.409915	25
	rs133015	22	38176519	0.021	0.002	1.2e-26	G	C	0.440063	110.25
	rs13269725	8	71547654	-0.026	0.004	1.9e-13	G	A	0.078342	42.25
	rs1318175	15	58293930	-0.066	0.003	1.3e-140	T	C	0.15987	484
	rs1316753	5	79235514	0.011	0.002	5.1e-09	C	G	0.393949	30.25
	rs13144151	4	145482013	0.018	0.003	3.8e-11	G	A	0.850001	36
	rs13118477	4	88783216	-0.019	0.002	1.1e-21	A	G	0.392641	90.25
	rs13111599	4	82995884	0.013	0.002	3.5e-09	G	A	0.737196	42.25
	rs13108218	4	3442204	0.001	0.002	0.719999	G	A	0.614805	0.25
	rs13107325	4	102267552	-0.08	0.004	7e-109	T	C	0.074942	400
	rs13087167	3	186160351	0.017	0.002	2.9e-17	C	G	0.632997	72.25
	rs13076933	3	12285932	-0.017	0.002	1.8e-14	G	T	0.259406	72.25
	rs13066793	3	86988393	0.022	0.003	3.3e-11	G	A	0.090115	53.7778
	rs12987470	2	187458584	0.011	0.002	2.2e-07	T	A	0.294664	30.25
	rs12986742	2	58748008	-0.011	0.002	3e-08	C	T	0.475905	30.25
	rs12928099	16	15056648	0.021	0.002	3.7e-25	A	C	0.29612	110.25
	rs12926854	16	85917652	0.012	0.002	9.5e-09	G	A	0.269909	36
	rs12916	5	75360714	0.01	0.002	5e-07	C	T	0.400519	25
	rs12898210	15	58347511	-0.04	0.003	1.9e-43	G	T	0.121527	177.778
	rs12880341	14	63769473	-0.005	0.003	0.0389996	C	T	0.159075	2.77778
	rs12691088	19	44915229	-0.09	0.007	1.1e-36	A	G	0.020967	165.306
	rs12603290	17	47572830	-0.009	0.002	5e-06	C	T	0.514767	20.25
	rs12575456	11	47304522	0.045	0.002	1.4e-106	A	G	0.321829	506.25
	rs1250258	2	215435462	0	0.002	1	T	C	0.736549	0
	rs12475332	2	226367331	0.013	0.002	2.5e-09	G	T	0.261038	42.25
	rs12445804	16	11612244	-0.001	0.004	0.81	A	G	0.07497	0.0625
	rs1229984	4	99318162	0	0.006	0.97	C	T	0.972788	0
	rs1225053	3	131924008	-0.015	0.002	3.9e-12	C	T	0.264492	56.25
	rs12246352	10	122945791	0.01	0.003	0.00109999	G	A	0.103936	11.1111
	rs12229011	12	124599168	-0.026	0.003	7.8e-16	T	C	0.097467	75.1111
	rs12208357	6	160122116	-0.019	0.004	2e-07	T	C	0.069993	22.5625
	rs12205778	6	42947011	0.016	0.002	8.6e-14	A	G	0.258895	64
	rs12185242	17	49329709	-0.008	0.002	1.5e-05	C	A	0.45465	16
	rs12054451	3	122345522	0	0.002	0.84	G	T	0.259485	0
	rs12046972	1	219499801	-0.015	0.002	1e-14	C	T	0.564083	56.25
	rs12046278	1	10739520	0	0.002	0.87	C	T	0.344979	0
	rs1183851	1	62492987	0.009	0.002	1.1e-05	C	T	0.395519	20.25
	rs118039278	6	160564494	0.018	0.004	4e-07	A	G	0.078824	20.25
	rs117762989	11	62836172	-0.027	0.005	9.3e-09	T	C	0.043022	29.16
	rs117733303	6	160501838	0.01	0.007	0.16	G	A	0.018388	2.04082
	rs117399007	15	58972800	-0.021	0.005	1.3e-05	T	C	0.043443	17.64
	rs117291242	11	380315	-0.032	0.005	4.5e-10	T	C	0.036567	40.96
	rs117287238	11	15069248	0.033	0.006	1.7e-08	A	G	0.028227	30.25
	rs117233107	12	4219355	0	0.008	0.97	A	G	0.015179	0
	rs117230571	13	41114931	-0.027	0.004	2.2e-13	G	A	0.076958	45.5625
	rs116857878	16	57018671	0.048	0.007	4.5e-12	T	C	0.020363	47.0204
	rs116843064	19	8364439	0.206	0.007	3.4e-195	A	G	0.019327	866.041
	rs11673631	19	44722159	0.001	0.005	0.83	C	G	0.043378	0.04
	rs116734477	5	52799190	0.007	0.005	0.16	T	C	0.040827	1.96
	rs11664369	18	60071840	-0.023	0.002	1.8e-26	T	C	0.267061	132.25
	rs11664106	18	2846814	0.008	0.002	0.00017	T	A	0.373914	16
	rs11640494	16	87996079	-0.015	0.002	6.5e-16	A	G	0.456655	56.25
	rs11632618	15	58432507	0.094	0.004	3.5e-139	A	G	0.069771	552.25
	rs11621792	14	24402720	0.003	0.002	0.11	T	C	0.452937	2.25
	rs11601507	11	5679844	-0.025	0.004	9e-12	A	C	0.069618	39.0625
	rs11591147	1	55039974	-0.001	0.007	0.89	T	G	0.01742	0.0204082
	rs115692156	2	20877448	0.003	0.011	0.75	G	A	0.008838	0.0743802
	rs114165349	1	26695422	-0.081	0.006	3.9e-37	C	G	0.023124	182.25
	rs113966472	16	56411282	0.032	0.006	4.8e-09	A	G	0.032408	28.4444
	rs113740515	12	122714863	0.038	0.002	1.2e-58	A	G	0.209452	361
	rs1133400	10	132645884	-0.008	0.002	0.000700003	G	A	0.220295	16
	rs1132274	20	17615510	-0.022	0.003	1.6e-16	A	C	0.154029	53.7778
	rs1125873	9	104959142	0.016	0.002	9.6e-17	T	A	0.492135	64
	rs11254464	10	17223448	0.013	0.002	3.9e-11	C	T	0.423107	42.25
	rs11240358	1	205101445	-0.008	0.002	3e-05	A	G	0.393823	16
	rs112350227	2	160235122	-0.032	0.006	4.1e-08	T	C	0.02764	28.4444
	rs11226108	11	104000027	-0.014	0.002	2.4e-08	C	G	0.191465	49
	rs112220485	17	42370695	-0.008	0.003	0.0230001	C	T	0.085772	7.11111
	rs11185542	3	196461056	0.013	0.002	2.2e-09	C	G	0.727874	42.25
	rs111849006	14	52115175	0.013	0.003	3.7e-07	A	G	0.181173	18.7778
	rs11171710	12	55974294	-0.011	0.002	2.8e-09	A	G	0.44814	30.25
	rs111363680	12	123682724	0.033	0.006	3.1e-08	T	C	0.031354	30.25
	rs11100083	4	156761446	0.013	0.002	2.4e-08	C	T	0.226356	42.25
	rs11045171	12	20317265	0.028	0.002	4.3e-32	G	A	0.197605	196
	rs11021232	11	95587644	-0.017	0.002	1.7e-11	C	T	0.18096	72.25
	rs11009262	10	33159836	-0.023	0.004	1.2e-08	T	G	0.057318	33.0625
	rs10899490	11	78394833	0	0.003	1	T	C	0.161461	0
	rs10883451	10	100164661	0.015	0.002	9.9e-15	C	T	0.496297	56.25
	rs10876447	12	53377157	-0.018	0.003	3.3e-12	A	G	0.154079	36
	rs1083470	2	147113546	0.012	0.002	3.4e-09	A	G	0.615717	36
	rs10822163	10	63364338	0.013	0.002	1.8e-11	G	C	0.473478	42.25
	rs10797119	9	89587580	-0.012	0.002	5.3e-10	C	T	0.536713	36
	rs10750766	11	65706327	-0.019	0.002	9.2e-19	A	C	0.709866	90.25
	rs10748165	12	70978610	0.009	0.002	3.3e-06	T	C	0.504135	20.25
	rs1055582	4	39698553	0.014	0.002	2.1e-13	T	C	0.505231	49
	rs10513801	3	186104564	-0.03	0.003	6.7e-28	G	T	0.137151	100
	rs10513688	3	171009429	0.003	0.003	0.39	A	G	0.097577	1
	rs10504477	8	70425950	-0.015	0.002	6.1e-15	C	T	0.412192	56.25
	rs1047891	2	210675783	-0.019	0.002	2.2e-20	A	C	0.315582	90.25
	rs10448340	9	136425617	0.001	0.002	0.780001	G	T	0.319827	0.25
	rs10405944	19	33237095	0.004	0.002	0.0649995	C	T	0.483319	4
	rs1037117	15	101528455	0.008	0.002	0.000109999	A	G	0.254809	16
	rs10271082	7	1041926	-0.019	0.002	4.7e-22	C	G	0.407729	90.25
	rs10201242	2	157608337	-0.006	0.004	0.11	A	G	0.073621	2.25
	rs10170658	2	237791327	-0.01	0.002	5.7e-06	T	G	0.2229	25
	rs10152471	15	101350708	-0.001	0.002	0.7	A	G	0.3887	0.25
	rs10108282	8	9863436	0.017	0.002	6.3e-13	A	T	0.205724	72.25
	rs1010759	20	35559863	-0.01	0.003	0.00016	A	G	0.140326	11.1111
	rs1009360	2	65048915	0.014	0.002	1.1e-12	C	T	0.418678	49
	rs10087526	8	54520591	0.003	0.002	0.24	G	T	0.198998	2.25
	rs10023962	4	177038357	0.011	0.002	3.7e-06	G	T	0.816773	30.25
LDL-C	rs9989419	16	56951227	-0.019	0.002	3.1e-18	G	A	0.605822	90.25
	rs9987289	8	9325848	0.045	0.004	5.1e-36	G	A	0.908808	126.562
	rs998584	6	43790159	0.008	0.002	0.00016	A	C	0.482764	16
	rs9977268	21	45487373	-0.002	0.003	0.36	T	C	0.198841	0.444444
	rs9933509	16	53784255	-0.014	0.002	1.2e-10	C	T	0.413891	49
	rs9834932	3	32493890	-0.032	0.004	1.5e-18	G	A	0.08883	64
	rs976002	4	68477569	0.022	0.002	4.4e-20	G	A	0.245283	121
	rs968050	6	98126684	0	0.002	0.85	T	C	0.482402	0
	rs9647335	3	136161568	-0.008	0.003	0.00239999	T	A	0.191855	7.11111
	rs9608972	22	30535320	-0.006	0.002	0.0109999	C	T	0.241474	9
	rs9604045	13	113272893	0.003	0.002	0.25	T	G	0.253661	2.25
	rs9584870	13	98593612	0.001	0.002	0.58	C	T	0.366193	0.25
	rs9561643	13	94600877	-0.002	0.002	0.29	C	A	0.314681	1
	rs9496567	6	100154877	-0.017	0.002	7.8e-13	A	G	0.243458	72.25
	rs9480889	6	108867818	-0.001	0.003	0.79	G	C	0.783135	0.111111
	rs9465693	6	20312889	-0.005	0.002	0.025	A	C	0.304859	6.25
	rs9426827	1	154617489	-0.004	0.002	0.032	C	T	0.478303	4
	rs921919	12	124780655	-0.005	0.002	0.0359998	A	G	0.669095	6.25
	rs867939	18	22331727	-0.003	0.002	0.23	A	G	0.576247	2.25
	rs830620	3	71629997	0.006	0.002	0.00340001	T	C	0.415546	9
	rs8102873	19	56977055	0.004	0.002	0.0669993	T	C	0.584863	4
	rs8086351	18	49645518	0.015	0.003	3.2e-08	G	C	0.824199	25
	rs8081548	17	7535517	-0.003	0.002	0.14	A	T	0.658564	2.25
	rs80236739	15	58680500	-0.011	0.005	0.0219999	G	A	0.049775	4.84
	rs8016418	14	70331572	0.013	0.002	5.9e-10	A	T	0.374844	42.25
	rs80005209	8	20014828	0.014	0.006	0.0259998	G	T	0.02958	5.44444
	rs79828839	10	50592671	0.014	0.003	2.9e-08	T	C	0.198784	21.7778
	rs79600951	16	56800342	0.008	0.004	0.0280001	G	C	0.091944	4
	rs79506257	13	102901217	0.01	0.005	0.0369999	A	G	0.047847	4
	rs79357714	11	117031923	-0.011	0.005	0.032	G	A	0.045721	4.84
	rs79287178	3	172576710	0.005	0.006	0.43	A	G	0.031141	0.694444
	rs79220007	6	26098246	-0.057	0.004	2e-48	C	T	0.076135	203.063
	rs79153732	8	19805426	-0.003	0.008	0.719999	T	C	0.017388	0.140625
	rs79149284	19	45010596	0.022	0.005	3.9e-05	T	C	0.038346	19.36
	rs78965095	18	49091501	0.016	0.007	0.0290001	T	C	0.020356	5.22449
	rs7861679	9	120613311	0.002	0.002	0.47	T	C	0.696823	1
	rs78588343	6	7249227	0.003	0.003	0.34	A	G	0.176191	1
	rs78484485	11	116727349	-0.009	0.005	0.0569994	A	G	0.054015	3.24
	rs7817574	8	143220400	-0.003	0.003	0.34	C	T	0.185021	1
	rs78058190	2	218835276	-0.001	0.005	0.83	A	G	0.050464	0.04
	rs77960347	18	49583585	0.071	0.009	7.7e-15	G	A	0.013351	62.2346
	rs7786339	7	72674114	-0.001	0.003	0.630001	T	C	0.168936	0.111111
	rs77542162	17	69085137	0.128	0.007	2.1e-74	G	A	0.022495	334.367
	rs7746081	6	16126703	-0.023	0.002	4e-25	A	G	0.304113	132.25
	rs7735249	5	54014309	0.008	0.003	0.016	G	C	0.112755	7.11111
	rs7734476	5	123513182	0.019	0.002	3.3e-19	A	G	0.550077	90.25
	rs7725218	5	1282299	-0.003	0.002	0.13	A	G	0.338276	2.25
	rs771481	1	93381096	0.004	0.003	0.13	A	T	0.183779	1.77778
	rs7714361	5	113154932	0.005	0.002	0.0560003	C	A	0.23371	6.25
	rs7704653	5	90959868	0.003	0.002	0.24	G	A	0.723013	2.25
	rs76962725	1	224239431	-0.017	0.006	0.00299999	A	G	0.037165	8.02778
	rs76456334	7	25788347	0.017	0.005	0.0016	C	T	0.039712	11.56
	rs76247316	3	160364496	-0.008	0.002	0.000179999	C	T	0.479967	16
	rs76186504	1	109297547	-0.087	0.007	4.9e-39	T	C	0.025032	154.469
	rs7603427	2	203452830	0.011	0.002	8.9e-08	T	C	0.533433	30.25
	rs7583067	2	100180388	0.005	0.002	0.0449997	T	C	0.240139	6.25
	rs75662196	8	20084145	-0.001	0.006	0.83	C	G	0.027966	0.0277778
	rs75609851	8	20013569	-0.004	0.011	0.69	A	G	0.010484	0.132231
	rs75406471	10	5215684	-0.01	0.003	0.000430002	A	G	0.15423	11.1111
	rs75268115	11	18280368	-0.013	0.004	0.000379997	G	A	0.084697	10.5625
	rs75152587	16	56546049	-0.002	0.009	0.87	T	G	0.012695	0.0493827
	rs75032664	8	19834914	-0.001	0.01	0.91	G	C	0.012818	0.01
	rs74500135	9	103841535	0.042	0.011	0.000129999	C	T	0.009882	14.5785
	rs742036	16	910725	-0.005	0.002	0.0290001	A	G	0.375263	6.25
	rs7400002	13	113821971	0.01	0.002	8.9e-05	G	A	0.230625	25
	rs73455693	18	60360263	0.002	0.006	0.66	A	G	0.037283	0.111111
	rs73243877	4	26045994	0.008	0.003	0.00470002	G	A	0.168142	7.11111
	rs73216701	3	109146446	0.002	0.002	0.43	G	A	0.430109	1
	rs7308584	12	6597578	-0.002	0.003	0.47	A	G	0.18441	0.444444
	rs73075609	20	5600143	0.037	0.007	1.2e-08	T	C	0.026791	27.9388
	rs7304603	12	70720620	0.003	0.002	0.1	C	T	0.537859	2.25
	rs729761	6	43836834	0.004	0.002	0.08	G	T	0.711896	4
	rs72926946	2	202613145	-0.016	0.002	1.2e-12	A	C	0.296118	64
	rs72911393	17	78394924	-0.018	0.003	5.3e-10	T	C	0.147618	36
	rs7281183	21	15039346	-0.001	0.002	0.719999	A	G	0.73691	0.25
	rs72801474	5	133108436	-0.005	0.004	0.14	A	G	0.091865	1.5625
	rs7274718	20	57538727	0.007	0.002	0.00219999	A	G	0.598539	12.25
	rs72631343	17	69195129	-0.029	0.003	4.6e-21	G	C	0.128894	93.4444
	rs72555385	7	73709143	0.02	0.005	4.7e-05	G	A	0.048989	16
	rs7244	5	154420953	0.003	0.003	0.26	A	G	0.174172	1
	rs7202323	16	72183214	-0.026	0.002	6.5e-25	G	T	0.229741	169
	rs7186799	16	57186104	0.006	0.002	0.004	C	A	0.437426	9
	rs7170463	15	41596720	-0.001	0.002	0.75	G	A	0.311672	0.25
	rs71603401	4	18032840	0.005	0.003	0.0810009	G	A	0.136795	2.77778
	rs7147511	14	100328481	0.003	0.002	0.14	T	C	0.495433	2.25
	rs7140110	13	113841051	0.021	0.002	9e-20	C	T	0.298356	110.25
	rs71311871	3	58434886	-0.028	0.004	7.5e-14	G	A	0.083052	49
	rs7077812	10	79336314	0.005	0.003	0.0759994	C	T	0.194905	2.77778
	rs703966	10	79194494	-0.003	0.002	0.2	A	G	0.41877	2.25
	rs7032795	9	114372665	0.006	0.002	0.00490004	C	T	0.493474	9
	rs6999569	8	125463528	-0.052	0.002	1.1e-137	G	A	0.470732	676
	rs696825	9	83968161	0	0.002	0.92	T	C	0.25293	0
	rs6916318	6	127113961	0.012	0.002	2.5e-09	T	A	0.530528	36
	rs6882076	5	156963286	0.032	0.002	1.7e-50	C	T	0.63426	256
	rs686030	9	15304784	0.011	0.003	0.000230001	A	C	0.858697	13.4444
	rs681869	18	2981400	-0.005	0.002	0.0460002	T	C	0.704166	6.25
	rs6800707	3	52482277	0.003	0.003	0.22	G	C	0.810535	1
	rs6792725	3	24478792	-0.008	0.002	0.000430002	G	A	0.692379	16
	rs6765484	3	50003880	0.004	0.002	0.0929994	T	C	0.472882	4
	rs6762415	3	133759713	-0.003	0.002	0.15	G	T	0.535176	2.25
	rs6709904	2	43853185	-0.043	0.003	1.1e-39	G	A	0.112585	205.444
	rs67038483	21	31723790	0.023	0.005	5.5e-06	T	C	0.044983	21.16
	rs6689611	1	109288646	-0.097	0.01	3.2e-24	A	G	0.012372	94.09
	rs6657811	1	109264661	-0.095	0.003	2.8e-207	T	A	0.129926	1002.78
	rs6562773	13	73614798	-0.007	0.002	0.000560003	G	A	0.547566	12.25
	rs6560499	9	76115850	-0.012	0.002	8.9e-09	A	G	0.576007	36
	rs6544713	2	43846742	-0.054	0.002	5e-129	C	T	0.676864	729
	rs6506033	18	289209	0.003	0.004	0.43	T	C	0.072514	0.5625
	rs6505176	17	30334751	-0.001	0.002	0.6	G	T	0.331514	0.25
	rs6475606	9	22081851	-0.02	0.002	2.3e-22	T	C	0.48447	100
	rs6469605	8	115589667	-0.006	0.002	0.0025	T	C	0.568577	9
	rs6460894	7	12207704	0.001	0.002	0.56	C	T	0.339014	0.25
	rs6426328	1	246727958	0.009	0.002	2.3e-05	T	G	0.489799	20.25
	rs62473520	7	130898683	-0.008	0.004	0.0359998	C	T	0.078006	4
	rs62428831	6	142926024	0.001	0.003	0.780001	C	T	0.141337	0.111111
	rs62405458	5	180798919	0.001	0.003	0.58	T	C	0.182663	0.111111
	rs62397245	5	177323687	0.001	0.003	0.780001	G	C	0.222377	0.111111
	rs62369502	5	43815476	-0.001	0.004	0.709999	C	T	0.076512	0.0625
	rs62274099	3	157092789	0.002	0.002	0.27	T	C	0.424245	1
	rs62271373	3	150348753	-0.005	0.004	0.28	A	T	0.059974	1.5625
	rs62246443	3	47130917	0.005	0.003	0.0749998	C	T	0.17409	2.77778
	rs6224	15	90880313	-0.008	0.002	0.00032	T	G	0.473852	16
	rs62135193	2	48528338	-0.001	0.002	0.55	T	C	0.541209	0.25
	rs62122481	2	20993943	0.066	0.002	6.19e-205	A	C	0.376939	1089
	rs62119267	19	44631381	-0.251	0.007	3.7e-271	C	A	0.022427	1285.73
	rs62112763	19	7220002	-0.001	0.002	0.75	G	C	0.438905	0.25
	rs62102718	19	33400107	0	0.002	0.84	T	A	0.286208	0
	rs61980899	14	81210500	-0.004	0.002	0.0830004	C	T	0.537722	4
	rs61905078	11	116725593	0.05	0.004	8.1e-36	C	A	0.073844	156.25
	rs61884005	11	14381384	-0.003	0.003	0.36	G	C	0.121452	1
	rs61805075	1	182167266	0.011	0.002	2.6e-07	A	G	0.328888	30.25
	rs61754230	12	71785666	0.043	0.007	9.1e-09	T	C	0.019784	37.7347
	rs61729990	11	117181816	-0.031	0.008	9.3e-05	A	C	0.017885	15.0156
	rs61596977	8	94984937	-0.006	0.003	0.032	T	C	0.14044	4
	rs61435086	8	20052781	-0.013	0.009	0.17	C	T	0.012323	2.08642
	rs61352607	12	57445390	-0.013	0.002	2.3e-07	T	G	0.240585	42.25
	rs6074012	20	46071527	0.012	0.002	2.4e-08	C	T	0.523914	36
	rs59104589	2	241298487	-0.01	0.002	1.7e-06	T	C	0.358564	25
	rs58542926	19	19268740	-0.106	0.004	5.79e-158	T	C	0.074622	702.25
	rs58298943	12	56997508	-0.001	0.004	0.77	T	C	0.084268	0.0625
	rs58148580	4	123837618	0.018	0.003	1.4e-07	T	C	0.109784	36
	rs57274629	1	65644609	0.005	0.002	0.012	G	A	0.357817	6.25
	rs56902258	14	23263905	-0.003	0.003	0.2	A	T	0.196194	1
	rs564832	11	30396699	0.005	0.002	0.02	C	T	0.314951	6.25
	rs559355	11	75740236	-0.004	0.003	0.15	T	A	0.157483	1.77778
	rs55812947	7	44751208	-0.003	0.003	0.34	C	T	0.128851	1
	rs55714927	17	7176997	-0.026	0.003	2.4e-23	T	C	0.190364	75.1111
	rs55637835	1	55000630	-0.019	0.003	8.4e-09	T	C	0.120881	40.1111
	rs556107	1	234717312	0.035	0.002	1.2e-63	T	C	0.523338	306.25
	rs4976033	5	68418419	0.001	0.002	0.630001	G	A	0.402092	0.25
	rs49675	8	9294178	0.018	0.004	5.3e-07	A	G	0.098209	20.25
	rs4930352	11	66299522	-0.002	0.002	0.38	T	G	0.494102	1
	rs4875043	8	143414602	-0.001	0.003	0.64	C	A	0.216951	0.111111
	rs483808	19	7892596	-0.001	0.002	0.69	T	C	0.701978	0.25
	rs480823	11	116655013	0.036	0.004	5.3e-20	C	T	0.078993	81
	rs4807462	19	3408667	0.001	0.002	0.55	T	A	0.359396	0.25
	rs4803818	19	45411025	0.027	0.007	8e-05	T	C	0.023044	14.8776
	rs478975	1	234637627	0.013	0.002	9.4e-10	A	G	0.642585	42.25
	rs4784709	16	56677463	0.014	0.005	0.00669993	A	T	0.959198	7.84
	rs4762756	12	20444643	0.003	0.002	0.17	C	T	0.735574	2.25
	rs4761234	12	69338325	-0.003	0.002	0.15	C	T	0.484358	2.25
	rs4731701	7	130746171	-0.008	0.002	0.000129999	T	C	0.493067	16
	rs472495	1	55055640	0.043	0.002	7.3e-85	T	G	0.648959	462.25
	rs4689088	4	7220526	0.012	0.002	2.1e-08	A	G	0.6187	36
	rs4676609	3	39172765	0.001	0.003	0.75	T	C	0.196494	0.111111
	rs4665972	2	27375230	-0.034	0.002	2.1e-57	C	T	0.604624	289
	rs4660586	1	41941558	-0.002	0.002	0.42	T	C	0.739369	1
	rs4650994	1	178546177	-0.004	0.002	0.032	A	G	0.531667	4
	rs460428	22	29575000	-0.004	0.002	0.15	C	T	0.230672	4
	rs45537841	7	87481324	-0.016	0.003	8e-09	T	C	0.180742	28.4444
	rs454715	19	48610979	-0.024	0.002	2e-30	G	T	0.58273	144
	rs4470903	7	21565298	0.033	0.003	1.7e-38	G	C	0.214997	121
	rs41785	7	116845966	-0.006	0.002	0.00460002	A	C	0.417497	9
	rs407133	21	45151974	0.002	0.002	0.27	C	G	0.558829	1
	rs3924313	12	124843829	-0.001	0.002	0.79	A	G	0.322445	0.25
	rs3828960	7	135509865	-0.002	0.003	0.34	G	A	0.206535	0.444444
	rs3823376	6	29976407	0.017	0.002	1e-16	T	C	0.502179	72.25
	rs3814883	16	29983601	-0.002	0.002	0.26	T	C	0.482538	1
	rs3802548	10	45457297	0.008	0.002	0.000790005	A	T	0.240533	16
	rs3798233	6	115995929	0.018	0.002	5.7e-17	C	A	0.401936	81
	rs3794752	17	55305468	0.002	0.002	0.37	C	T	0.280971	1
	rs3775228	4	87064014	0.01	0.002	1e-06	T	C	0.399699	25
	rs3768321	1	39570256	-0.004	0.003	0.14	T	G	0.196392	1.77778
	rs3749748	5	128014857	0.008	0.002	0.000560003	T	C	0.247248	16
	rs3747973	1	205708020	0.003	0.002	0.18	G	A	0.5926	2.25
	rs3746915	21	42298682	-0.005	0.002	0.012	G	A	0.580677	6.25
	rs3745683	19	11237845	-0.015	0.004	0.000230001	A	G	0.074611	14.0625
	rs3732356	3	119810266	-0.025	0.004	6.7e-09	T	G	0.933674	39.0625
	rs35882350	12	513963	0.014	0.002	4e-09	G	A	0.261067	49
	rs35764292	2	21254157	0.028	0.005	1.8e-07	G	A	0.040467	31.36
	rs35763453	12	45822112	0.006	0.005	0.18	C	T	0.058669	1.44
	rs35745599	7	6411449	0.009	0.002	0.000140001	T	C	0.238839	20.25
	rs35081008	19	58150868	-0.032	0.003	1.2e-27	T	C	0.14811	113.778
	rs34642857	3	123332172	-0.004	0.002	0.1	C	T	0.250439	4
	rs343	8	19953276	-0.012	0.004	0.00189998	A	C	0.083153	9
	rs34265667	8	41684575	-0.032	0.006	2.6e-08	A	G	0.033987	28.4444
	rs34180494	15	75077671	-0.005	0.002	0.0299999	C	A	0.273766	6.25
	rs34045894	10	33678561	0.002	0.003	0.53	A	G	0.156159	0.444444
	rs325485	5	104659667	-0.004	0.002	0.0669993	G	A	0.602938	4
	rs3184504	12	111446804	0.027	0.002	2.3e-38	C	T	0.517203	182.25
	rs308	8	19959965	-0.022	0.007	0.00269998	G	T	0.020586	9.87755
	rs2943645	2	226234464	0	0.002	0.89	T	C	0.646632	0
	rs2937124	16	69828206	0.001	0.002	0.7	T	C	0.362793	0.25
	rs2925979	16	81501185	-0.004	0.002	0.1	C	T	0.699989	4
	rs2910949	5	39522379	0.009	0.002	1.9e-05	G	T	0.354777	20.25
	rs28577186	16	4438190	-0.004	0.002	0.0589997	A	G	0.664609	4
	rs28383314	6	32619436	0.017	0.002	9.9e-16	C	T	0.624111	72.25
	rs28362901	15	74420596	-0.008	0.004	0.0340001	A	C	0.088473	4
	rs2812208	13	50132951	-0.017	0.007	0.017	C	G	0.020897	5.89796
	rs2804894	10	33358163	0.001	0.002	0.709999	A	G	0.734751	0.25
	rs2803619	10	112174626	-0.018	0.002	1.2e-14	C	G	0.724365	81
	rs275184	15	39152478	-0.012	0.003	2.5e-05	G	T	0.162068	16
	rs2750411	6	138905493	-0.002	0.002	0.35	G	T	0.491855	1
	rs2740488	9	104899461	-0.025	0.002	1.3e-26	C	A	0.265466	156.25
	rs2738447	19	11116804	0.042	0.002	2.9e-89	C	A	0.592612	441
	rs2726112	7	36139143	0.006	0.002	0.00549997	G	A	0.45374	9
	rs267738	1	150968149	-0.007	0.003	0.00490004	G	T	0.219351	5.44444
	rs2645979	12	83623264	-0.001	0.002	0.7	A	G	0.357237	0.25
	rs2642438	1	220796686	0.025	0.002	8e-29	G	A	0.702657	156.25
	rs2618566	20	17864040	-0.025	0.002	9.6e-30	T	G	0.659861	156.25
	rs2586116	17	40349572	-0.004	0.002	0.11	G	C	0.259359	4
	rs254559	5	135109292	-0.002	0.002	0.4	A	C	0.405057	1
	rs2544654	5	73592455	-0.001	0.002	0.630001	T	G	0.715372	0.25
	rs2520096	9	134054294	0	0.002	0.88	G	A	0.270194	0
	rs2516331	1	212243647	0.002	0.002	0.39	A	C	0.375291	1
	rs2494747	14	104792100	-0.002	0.002	0.29	T	G	0.615805	1
	rs2435307	18	23547946	-0.006	0.002	0.00329997	T	C	0.486229	9
	rs2419605	10	112218339	-0.011	0.003	0.000239999	G	A	0.147688	13.4444
	rs2417125	9	128799953	-0.005	0.002	0.0269998	G	A	0.28405	6.25
	rs2407278	8	37541772	-0.007	0.006	0.27	G	A	0.030159	1.36111
	rs235314	21	44851537	0.001	0.002	0.5	T	C	0.532057	0.25
	rs2339234	5	171185542	-0.003	0.002	0.16	A	G	0.683227	2.25
	rs2302263	11	64254349	0.007	0.004	0.0599998	T	C	0.088863	3.0625
	rs2298632	1	23383982	0.004	0.002	0.0840001	T	C	0.497862	4
	rs2298624	18	49902652	0.008	0.003	0.00619998	T	C	0.132434	7.11111
	rs2298214	1	999842	-0.005	0.002	0.0259998	A	C	0.577173	6.25
	rs2297409	9	104813965	-0.006	0.003	0.0239999	A	G	0.194468	4
	rs2294915	22	43945024	-0.007	0.002	0.00269998	T	C	0.231729	12.25
	rs2290866	8	104895605	0.002	0.002	0.51	T	C	0.253121	1
	rs2287622	2	168973818	-0.021	0.002	2.9e-23	G	A	0.602794	110.25
	rs2268840	3	186213385	0.002	0.002	0.44	C	T	0.228272	1
	rs2256609	22	21570728	-0.01	0.003	8.8e-05	G	A	0.189296	11.1111
	rs2247355	8	102864552	0.005	0.003	0.0790005	T	C	0.182785	2.77778
	rs2240466	7	73441939	0.001	0.003	0.66	A	G	0.1229	0.111111
	rs2238162	13	32385062	-0.017	0.002	2.8e-15	T	C	0.522955	72.25
	rs2237035	4	54660085	-0.003	0.002	0.16	T	G	0.38595	2.25
	rs2199048	17	75872207	-0.012	0.002	8.6e-08	G	A	0.313764	36
	rs2187114	18	72850603	-0.005	0.003	0.14	A	G	0.101058	2.77778
	rs2155220	11	76555128	-0.004	0.002	0.0389996	T	C	0.438259	4
	rs2131919	9	92521605	0	0.003	0.87	G	A	0.164258	0
	rs2111705	14	74794938	-0.01	0.002	5.3e-06	A	G	0.543896	25
	rs2098918	4	37149911	0	0.002	0.93	T	C	0.454941	0
	rs2073547	7	44542732	0.036	0.003	2.3e-40	G	A	0.184007	144
	rs2071379	17	28368811	0.008	0.002	8.6e-05	G	A	0.595306	16
	rs2068888	10	93079885	-0.019	0.002	4.6e-20	A	G	0.450695	90.25
	rs2066714	9	104824472	0.021	0.003	1.4e-11	C	T	0.128775	49
	rs201441	7	102094047	-0.001	0.002	0.77	G	T	0.580937	0.25
	rs1970811	10	125007927	-0.003	0.002	0.23	C	T	0.457454	2.25
	rs1938566	1	98013425	-0.006	0.003	0.04	T	C	0.834554	4
	rs1888488	21	39314595	0.014	0.002	1.2e-10	T	C	0.565288	49
	rs188608977	1	109182782	0.048	0.01	3.5e-06	T	G	0.010569	23.04
	rs1883711	20	40551182	0.103	0.006	7.5e-64	C	G	0.031412	294.694
	rs1862205	5	109320934	0.005	0.002	0.0129999	A	G	0.404998	6.25
	rs183906992	7	95382636	0.003	0.005	0.61	C	T	0.042729	0.36
	rs1801689	17	66214462	0.062	0.006	1.8e-24	C	A	0.030551	106.778
	rs1800961	20	44413724	-0.06	0.006	4.1e-23	T	C	0.030912	100
	rs17713879	2	254215	0.003	0.002	0.17	A	G	0.364836	2.25
	rs1760940	14	20470092	0.007	0.002	0.00350002	C	A	0.247083	12.25
	rs1760801	1	154287174	-0.007	0.002	0.00189998	A	G	0.295743	12.25
	rs17585887	6	139514361	-0.008	0.002	8.4e-05	C	T	0.59109	16
	rs174566	11	61824890	-0.032	0.002	3.8e-47	G	A	0.349716	256
	rs17309930	11	27726946	-0.004	0.003	0.12	A	C	0.205433	1.77778
	rs17138358	7	17880630	-0.005	0.002	0.016	C	G	0.398484	6.25
	rs17124112	14	88139165	-0.007	0.004	0.0749998	A	C	0.079894	3.0625
	rs17050272	2	120548864	-0.021	0.002	2.5e-22	A	G	0.409275	110.25
	rs17036085	1	109291417	-0.056	0.009	3.6e-09	G	A	0.012169	38.716
	rs1601933	15	58379360	-0.01	0.002	3e-06	T	C	0.466584	25
[truncated: 1,387 more rows]

## Sheet: Table S6
Supplementary Table S6. Causal effects of lipid-related traits levels on vascular dementia via multivariable IVW MR analyses
Phenotypes	IVs	OR (95% CI)	Beta (SE)	P
Model 1
HDL-C	328	1.023 (0.835-1.255)	0.023 (0.104)	0.824
LDL-C	328	0.918 (0.730-1.154)	-0.086 (0.117)	0.462
mvMR‐Egger intercept			0.011 (0.006)	0.041
Q statistic				<0.001
Model 2
HDL-C	323	0.766 (0.384-1.528)	-0.266 (0.352)	0.45
apoA-I	323	1.148 (0.537-2.456)	0.138 (0.388)	0.722
mvMR‐Egger intercept			0.006 (0.006)	0.316
Q statistic				0.333
Model 3
HDL-C	416	0.634 (0.214-1.879)	-0.455 (0.554)	0.412
LDL-C	416	1.212 (0.441-3.331)	0.192 (0.516)	0.71
TG	416	0.869 (0.606-1.247)	-0.140 (0.184)	0.449
apoA	416	1.449 (0.549-3.824)	0.371 (0.495)	0.454
apoB	416	0.863 (0.374-1.994)	-0.147 (0.427)	0.73
mvMR‐Egger intercept			-0.003 (0.004)	0.496
Q statistic				0.334

## Sheet: Table S7
Supplementary file 1-Table 2. SMR association between expression of gene HMGCR, PCSK9,NPC1L1 or CETP and vascular dementia outcomes.
Supplementary Table S7. SMR association between expression of gene HMGCR, PCSK9, NPC1L1 or APOB and VaD outcomes
Gene	probe ID	Gene chromosome	Probe_bp	top SNP	SNP Chromosome	top SNP_base pair	Effect allele	Other allele	Effect allele frequency	eQTL association				GWAS association			SMR association				HEIDI Test
										beta	se	p		beta	se	p	beta	se	p		p	Number of SNPs
HMGCR	ENSG00000113161	5	74645041	rs6453133	5	74692776	G	A	0.289	0.128	0.009	1.2137e-50		0.059	0.052	0.262	0.457879	0.409713	0.263755		0.0750006	20
PCSK9	ENSG00000169174.10	1	55505221	rs472495	1	55521313	T	G	0.625	0.187	0.025	8.79413e-14		-0.017	0.05	0.731	-0.0912696	0.266617	0.732107		0.706416	8
NPC1L1	ENSG00000015520.14	7	44552134	rs41279633	7	44580876	T	G	0.143	0.473	0.054	1.68881e-18		-0.037	0.061	0.547	-0.0777398	0.129166	0.547268		0.00490185	5
APOB	ENSG00000084674.14	2	21224301	rs4665179	2	21321724	C	T	0.304175	0.410481	0.0367049	4.92463e-29		0.0043	0.0545	0.937	0.0104755	0.132774	0.937114		0.720717	20

## Sheet: Table S8
Supplementary Table S8. Information of genetic instrumental variants associated with LDL cholesterol located within 200 kb windows from gene HMGCR, PCSK9, NPC1L1 or APOB
Gene	SNP	Chromosome	Base pair	Beta	SE	p	Effect allele	other allele	Maf	mean F-statistic
HMGCR
	rs6453188	5	75290164	-0.014225	0.00237163	2e-09	A	G	0.72899	35.9758
	rs62361845	5	75178017	-0.0181138	0.00316769	1.1e-08	C	T	0.126738	32.6989
	rs545145188	5	75136624	-0.0245387	0.0026362	1.3e-20	T	C	0.222411	86.6456
	rs1525783	5	75240469	0.0142622	0.00238216	2.1e-09	A	G	0.278378	35.8452
	rs115354848	5	75216636	0.0393845	0.00687957	1e-08	A	G	0.023441	32.7739
	rs10942746	5	75216334	0.0144141	0.00211611	9.7e-12	G	C	0.459804	46.3979
	rs10075456	5	75154614	0.0430973	0.00653218	4.2e-11	A	G	0.027649	43.5295
	rs10056543	5	75143624	0.0258831	0.00224267	8.2e-31	C	A	0.319761	133.199
PCSK9
	rs79396670	1	55588142	-0.0336489	0.00562029	2.1e-09	A	G	0.035496	35.8446
	rs77875082	1	55485042	0.0481535	0.00605559	1.8e-15	A	G	0.032388	63.2329
	rs7551981	1	55719166	0.0333048	0.00214839	3.4e-54	T	G	0.624824	240.319
	rs7546522	1	55516713	-0.0168117	0.00295297	1.2e-08	T	C	0.155442	32.412
	rs7525503	1	55522558	0.0454642	0.0075822	2e-09	T	G	0.02036	35.9541
	rs6691964	1	55433978	-0.0234719	0.00358388	5.8e-11	A	G	0.092472	42.8933
	rs6662286	1	55730327	0.0367331	0.00385771	1.7e-21	C	T	0.920938	90.6684
	rs56349475	1	55576102	-0.0475957	0.00671909	1.4e-12	C	T	0.024601	50.1781
	rs55637835	1	55466303	-0.0187129	0.00324835	8.4e-09	T	C	0.120881	33.1861
	rs530804537	1	55583210	-0.192336	0.00997554	7.8e-83	A	G	0.011303	371.748
	rs472495	1	55521313	0.0425743	0.00218093	7.3e-85	T	G	0.648959	381.076
	rs45613943	1	55518622	-0.0340702	0.0048672	2.6e-12	C	T	0.048725	48.9994
	rs41294821	1	55513183	-0.0386615	0.00705365	4.2e-08	T	C	0.022807	30.0421
	rs2495517	1	55448842	0.0177548	0.0025792	5.8e-12	G	A	0.794271	47.3873
	rs2483205	1	55518316	-0.0295845	0.00214514	2.9e-43	T	C	0.438633	190.203
	rs2479420	1	55492190	-0.0283879	0.0023826	9.9e-33	T	C	0.73803	141.959
	rs17192725	1	55496131	0.0305717	0.00365832	6.4e-17	A	G	0.095408	69.8354
	rs17111503	1	55503448	0.0406795	0.00235743	1e-66	G	A	0.268141	297.765
	rs17111483	1	55485098	-0.023068	0.00354515	7.7e-11	C	T	0.096727	42.34
	rs150119739	1	55520938	0.0452728	0.00520209	3.2e-18	A	G	0.045318	75.7389
	rs146273942	1	55453841	-0.0538858	0.00722418	8.7e-14	A	G	0.023188	55.638
	rs12750160	1	55674000	-0.220271	0.00976993	1.5e-112	T	C	0.012373	508.314
	rs12739979	1	55496648	-0.0202563	0.00254032	1.5e-15	T	C	0.246521	63.5833
	rs12732125	1	55470153	-0.10344	0.0073736	1e-44	T	C	0.020368	196.797
	rs11810371	1	55496861	-0.0294547	0.00507333	6.4e-09	A	G	0.043743	33.7072
	rs11591147	1	55505647	-0.348456	0.00793088	1e-200	T	G	0.017468	1930.43
	rs11587071	1	55522674	-0.0282322	0.00279415	5.3e-24	T	C	0.168881	102.092
	rs11583974	1	55551718	0.0314531	0.00517068	1.2e-09	A	G	0.042146	37.0025
	rs11206517	1	55526428	0.0680285	0.00580615	1e-31	G	T	0.033149	137.279
	rs11206513	1	55507649	0.0316517	0.0021463	3.2e-49	T	C	0.600617	217.477
NPC1L1
	rs73107478	7	44596644	0.0259282	0.00392582	4e-11	C	A	0.079159	43.6198
	rs217399	7	44592091	-0.0213142	0.00211012	5.5e-24	T	C	0.443739	102.029
	rs2073547	7	44582331	0.0355498	0.00267287	2.3e-40	G	A	0.184007	176.896
	rs148825701	7	44559803	0.017365	0.00256025	1.2e-11	T	C	0.212133	46.0029
	rs12666108	7	44586578	0.0249436	0.00363876	7.1e-12	C	T	0.091516	46.9906
	rs11763759	7	44570067	-0.0133498	0.00234076	1.2e-08	C	T	0.303527	32.5264
APOB
	rs75679231	2	20852025	0.0474884	0.0063988	1.20005e-13	C	A	0.028955	55.078
	rs4971541	2	20916051	0.0186704	0.00236146	2.70023e-15	G	A	0.265729	62.5095
	rs71435586	2	21069844	-0.0687846	0.0055815	6.79986e-35	A	G	0.036474	151.873
	rs112968086	2	21074166	-0.0156233	0.00247323	2.69998e-10	A	G	0.230853	39.904
	rs62120793	2	21093112	-0.0676764	0.00800936	2.90001e-17	G	A	0.017523	71.3968
	rs4305231	2	21111034	-0.0348933	0.0021561	6.59933e-59	T	C	0.377607	261.907
	rs7557067	2	21208211	-0.0527285	0.0024772	1.50003e-100	G	A	0.227783	453.074
	rs116537336	2	21033574	0.0743904	0.00841299	9.3994e-19	A	C	0.016745	78.1867
	rs150035236	2	21096976	-0.083253	0.0115805	6.4998e-13	C	T	0.009079	51.6827
	rs137978266	2	21135220	0.0709235	0.0100731	1.9002e-12	G	A	0.011587	49.574
	rs36134738	2	21182116	-0.0809843	0.00417288	6.70039e-84	G	A	0.069376	376.643
	rs1344063	2	21184545	-0.0127234	0.00209853	1.29999e-09	C	T	0.557534	36.76
	rs497166	2	21238897	0.0749277	0.00751954	2.19989e-23	C	T	0.980477	99.2893
	rs12720820	2	21239661	-0.0712302	0.00376652	9.20026e-80	C	T	0.083743	357.641
	rs6727365	2	21097962	-0.0300554	0.00224201	5.60015e-41	C	T	0.319462	179.709
	rs79424931	2	21101806	0.0247664	0.00450681	3.89996e-08	A	C	0.057761	30.1986
	rs75941937	2	21122046	-0.05671	0.00501906	1.29987e-29	T	C	0.046041	127.666
	rs10198175	2	21133883	-0.0465695	0.00338712	5.19996e-43	G	A	0.891006	189.035
	rs140798831	2	21149771	-0.0364752	0.00219716	6.79986e-62	C	T	0.656841	275.595
	rs149196850	2	21179379	-0.0709265	0.00960711	1.59993e-13	A	G	0.012092	54.5044
	rs113190464	2	21189751	-0.0681472	0.00964729	1.59993e-12	A	G	0.011877	49.8983
	rs1317821	2	21213193	0.0486294	0.00238484	1.99986e-92	T	C	0.25754	415.795
	rs7255	2	20878820	0.0173508	0.0020943	1.20005e-16	C	T	0.554019	68.6375
	rs340620	2	20924110	0.0139999	0.00216558	1e-10	C	T	0.632846	41.7928
	rs56078519	2	20926296	0.0633188	0.00529317	5.60015e-33	G	A	0.040245	143.098
	rs340624	2	20932572	-0.0210418	0.00211374	2.39994e-23	C	T	0.408045	99.0975
	rs62123892	2	21084445	-0.0578687	0.00420455	4.19952e-43	T	G	0.067356	189.43
	rs10184290	2	21093216	-0.0384427	0.00374409	9.8992e-25	C	T	0.084862	105.423
	rs6531257	2	21098532	-0.0332511	0.00339882	1.29987e-22	A	G	0.104493	95.7096
	rs145400326	2	21109020	-0.0305377	0.00509886	2.1e-09	C	T	0.045182	35.8696
	rs62120798	2	21115501	0.0558084	0.00523374	1.50003e-26	C	T	0.044009	113.704
	rs1801701	2	21228827	0.0394744	0.00348176	8.60003e-30	T	C	0.098843	128.539
	rs79800183	2	20978615	-0.0833989	0.00779052	9.60064e-27	C	T	0.019482	114.601
	rs115692156	2	21077208	-0.0801663	0.0119215	1.80011e-11	G	A	0.008834	45.2191
	rs113039407	2	21121012	0.0619963	0.00659373	5.30029e-21	C	A	0.0261	88.4035
	rs4971538	2	21121130	0.0541705	0.00319447	1.69981e-64	G	T	0.120984	287.56
	rs62122481	2	21216815	0.065847	0.00215559	1e-200	A	C	0.376939	933.125
	rs4665709	2	21220955	-0.0487348	0.00260358	3.50026e-78	A	G	0.19872	350.378
	rs533617	2	21233972	-0.115228	0.00533769	2.30144e-103	C	T	0.039479	466.025
